# Supplementary material for: Selective Sweeps and Polygenic Adaptation Drive Local Adaptation along Moisture and Temperature Gradients in Natural Populations of Coast Redwood and Giant Sequoia
Source: MDPI journal article supplement (doi:10.3390/genes12111826), 2021-11-19
Supplement: s1 [file s1]

## Supplementary Materials

### Selective sweeps and polygenic adaptation drive local adaptation along moisture and temperature gradients in natural populations of coast redwood and giant sequoia

Amanda R De La Torre, Manoj K. Sekhwal, David B. Neale

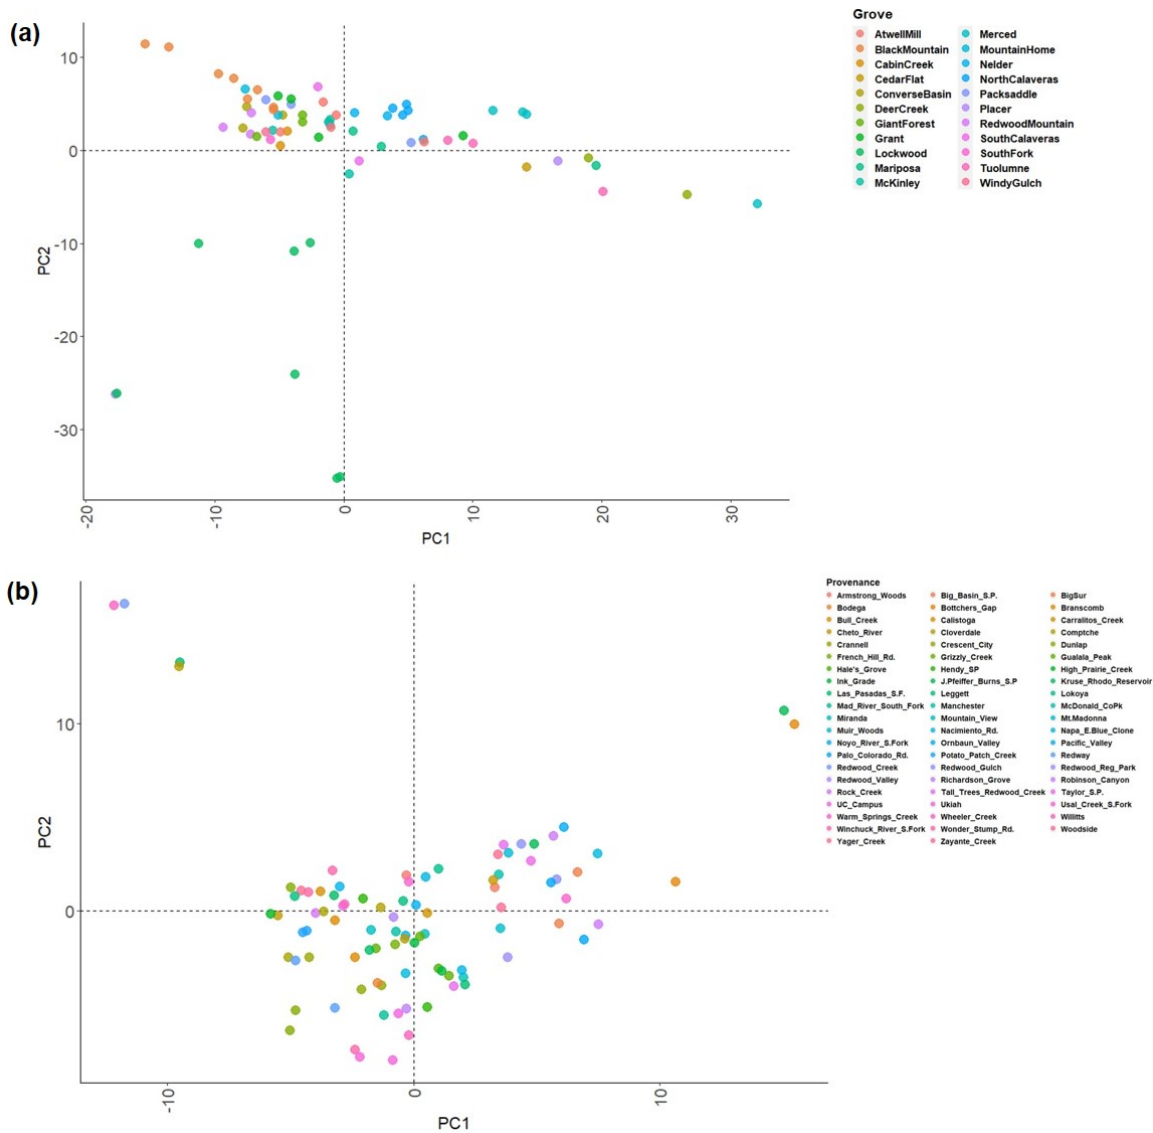

**Supplementary Figure S1.** Population structure in SEGI (a) and SESE (b) based on principal component analysis (PCA) results. PCA was carried out at TASSEL and plots were performed in R.

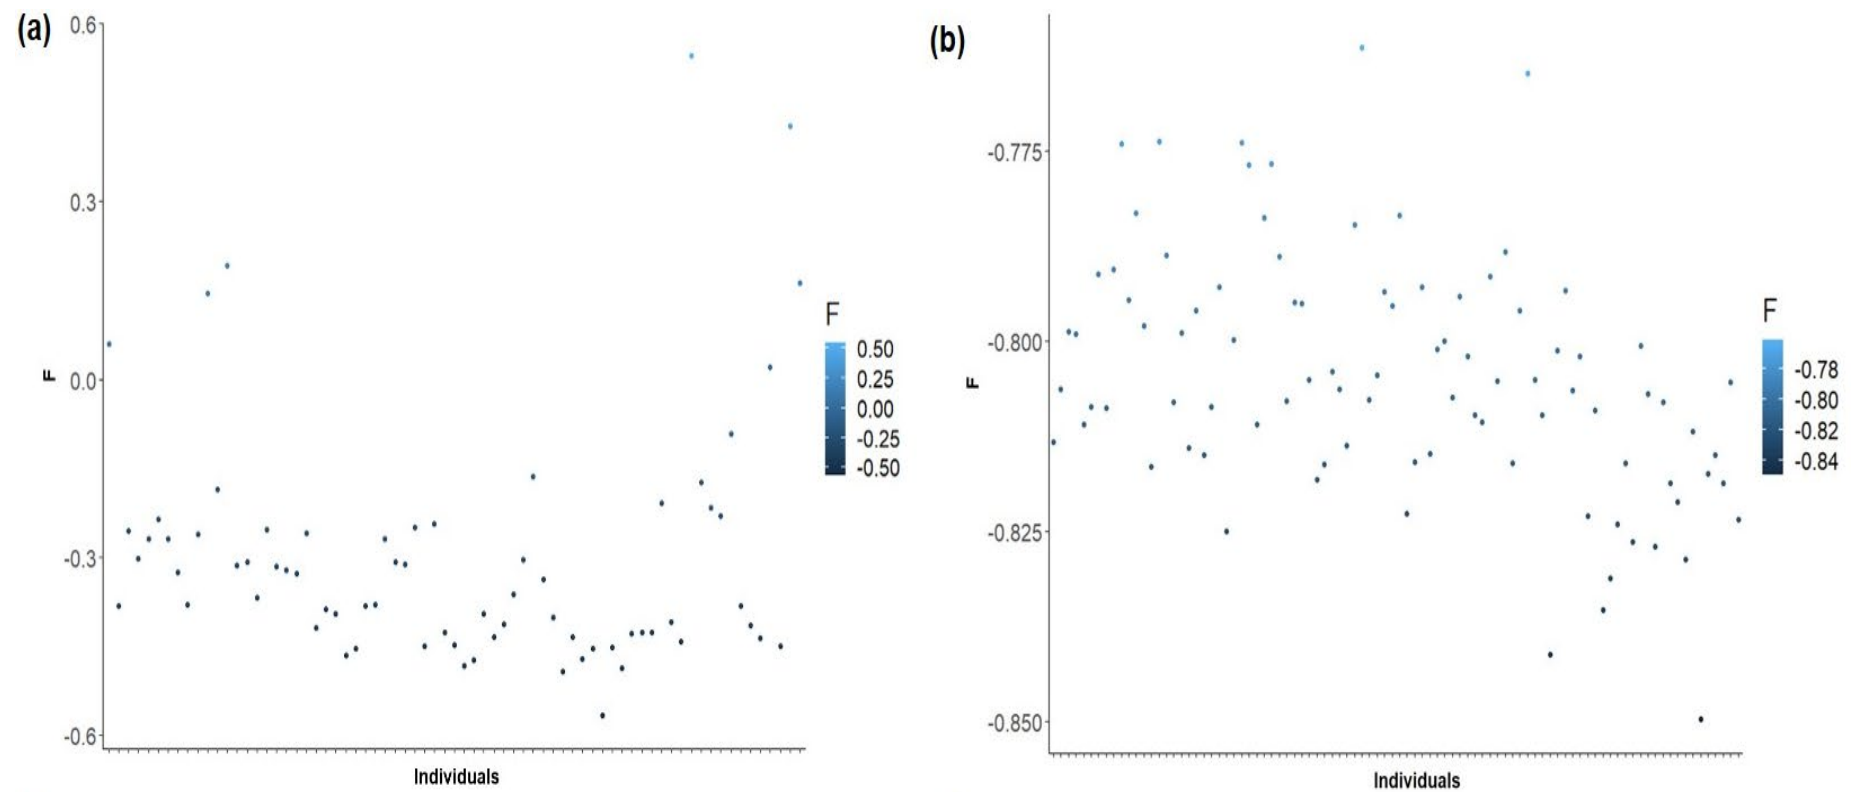

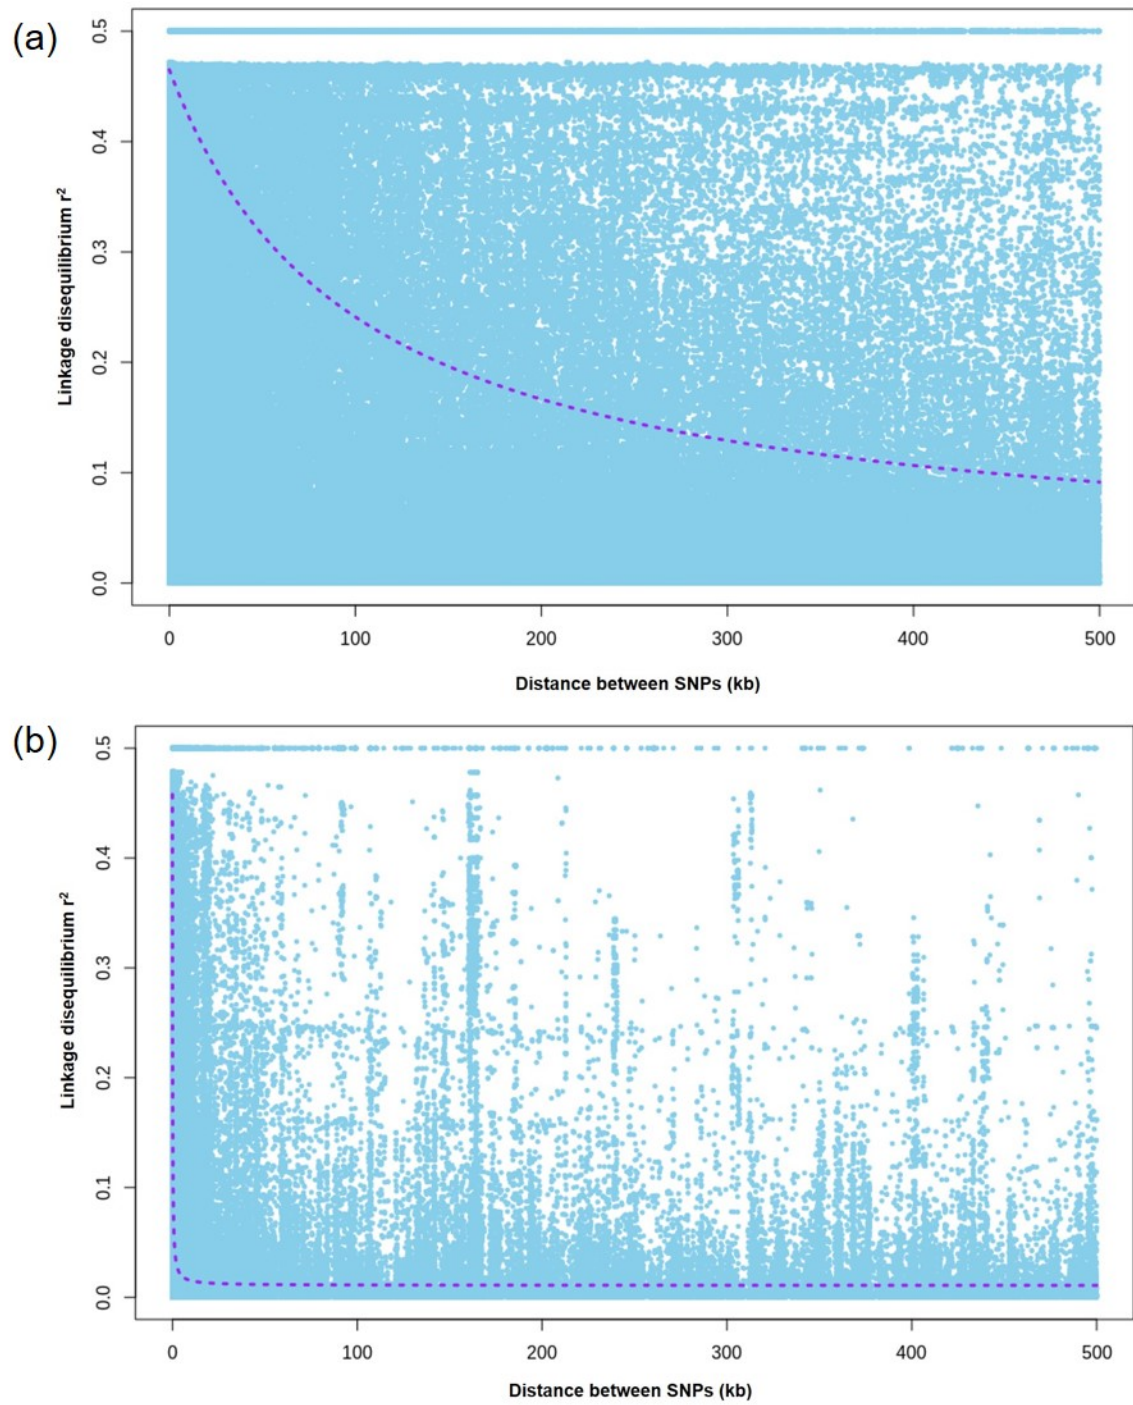

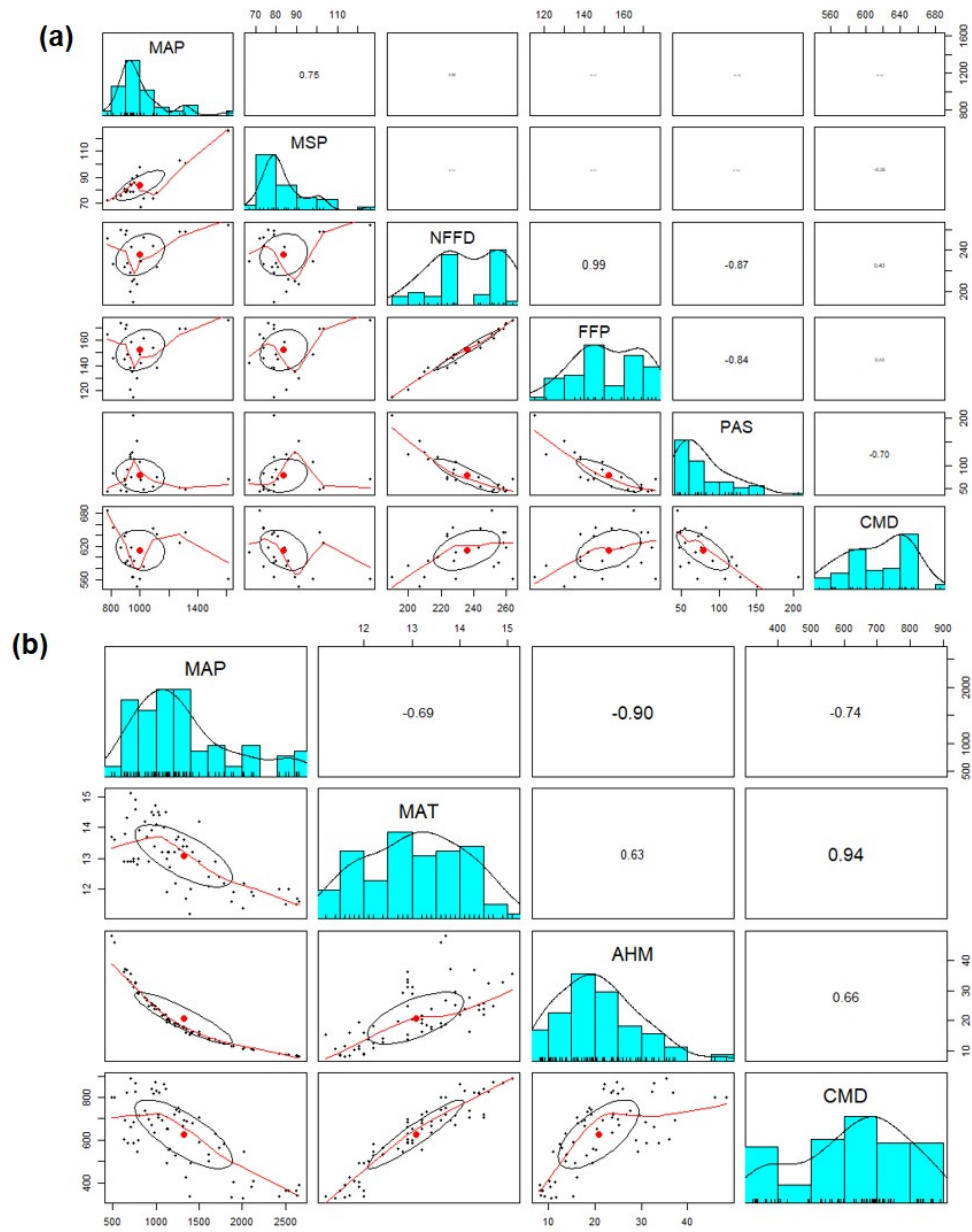

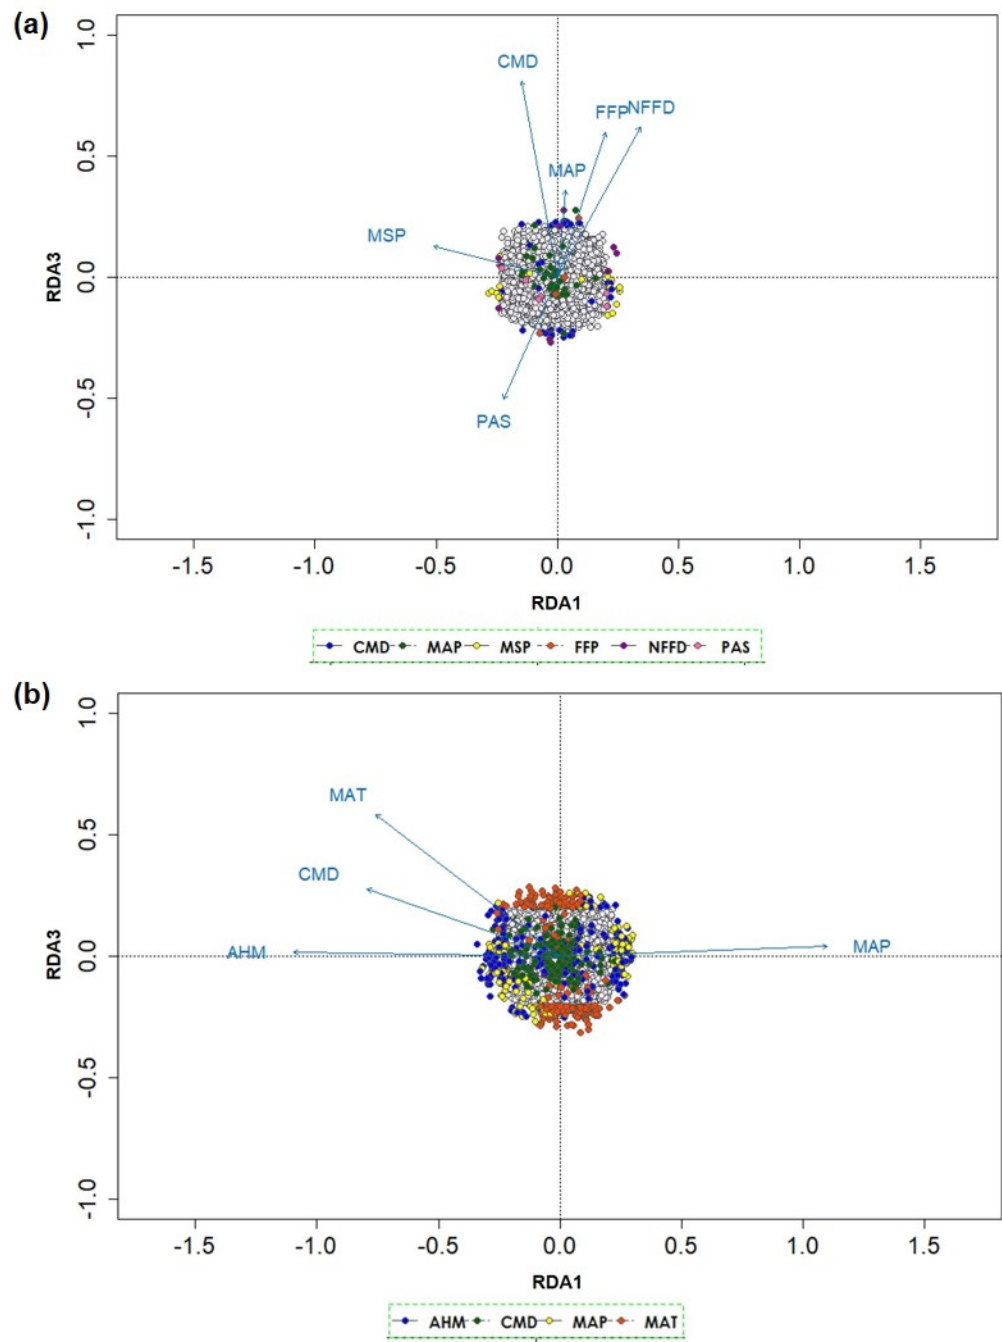

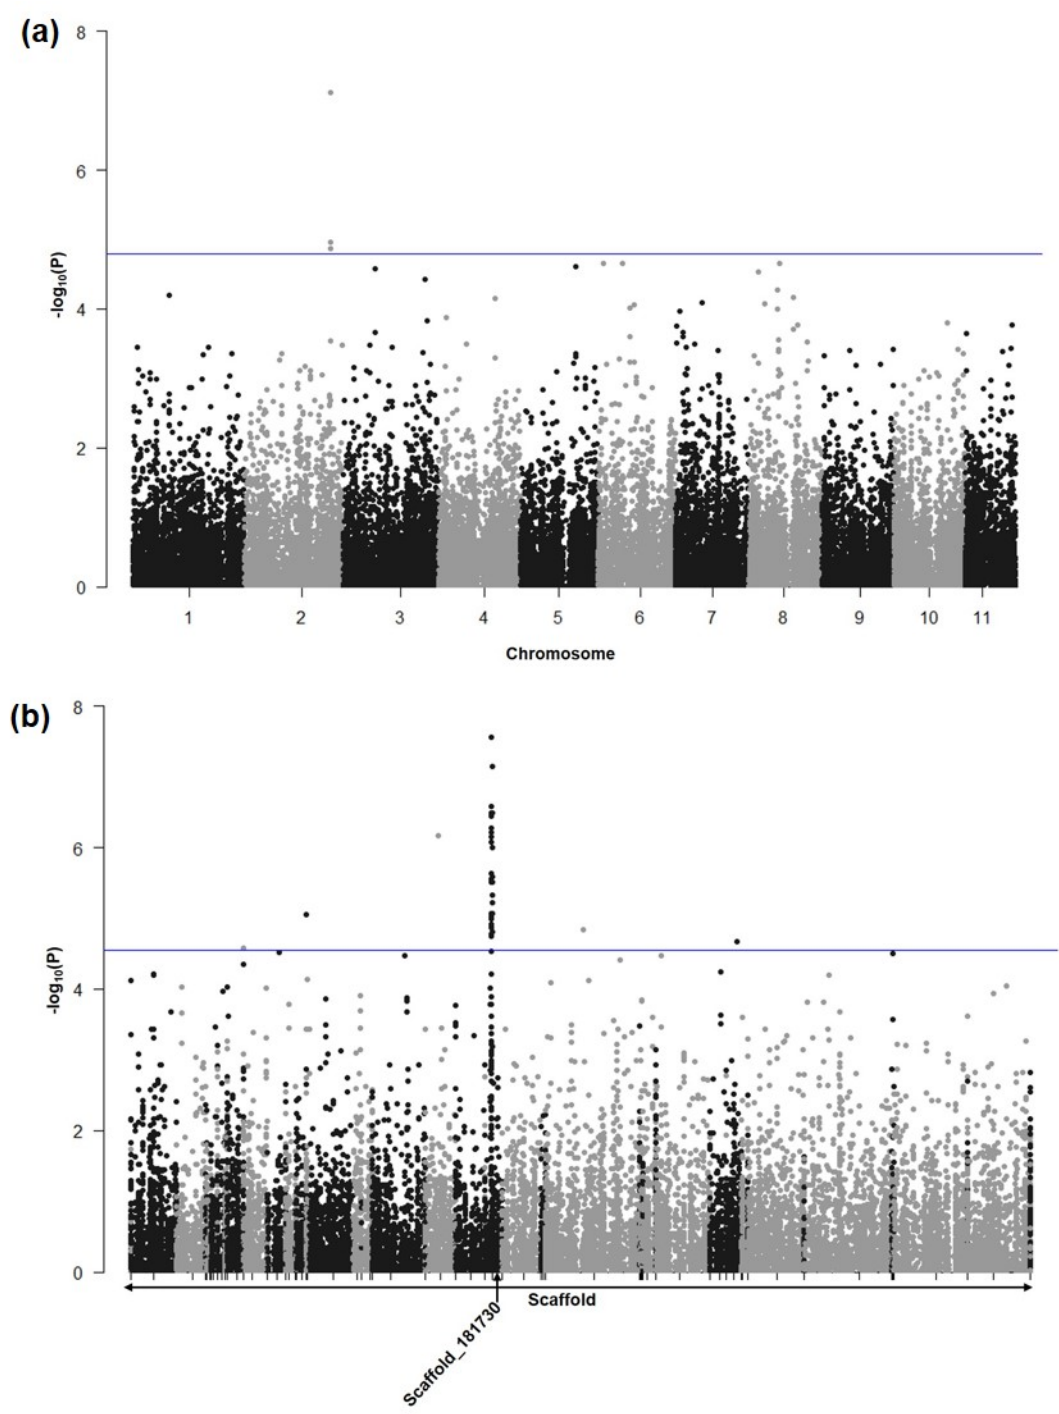

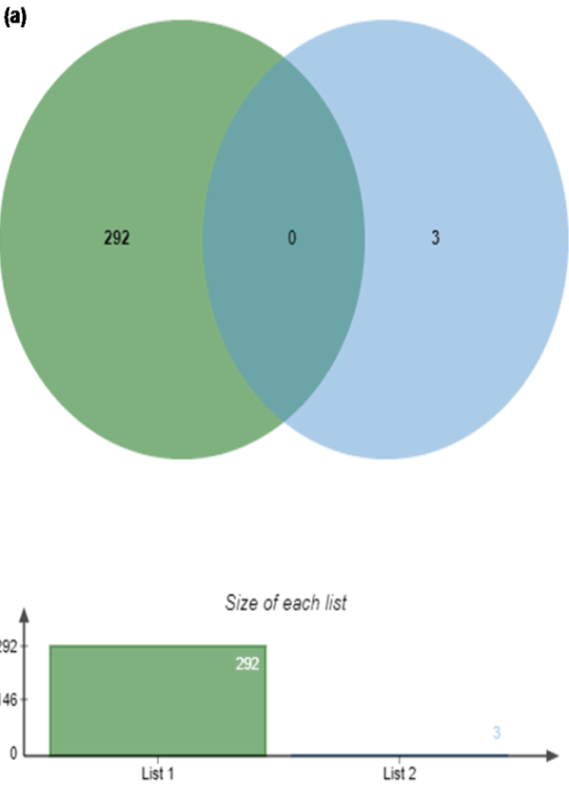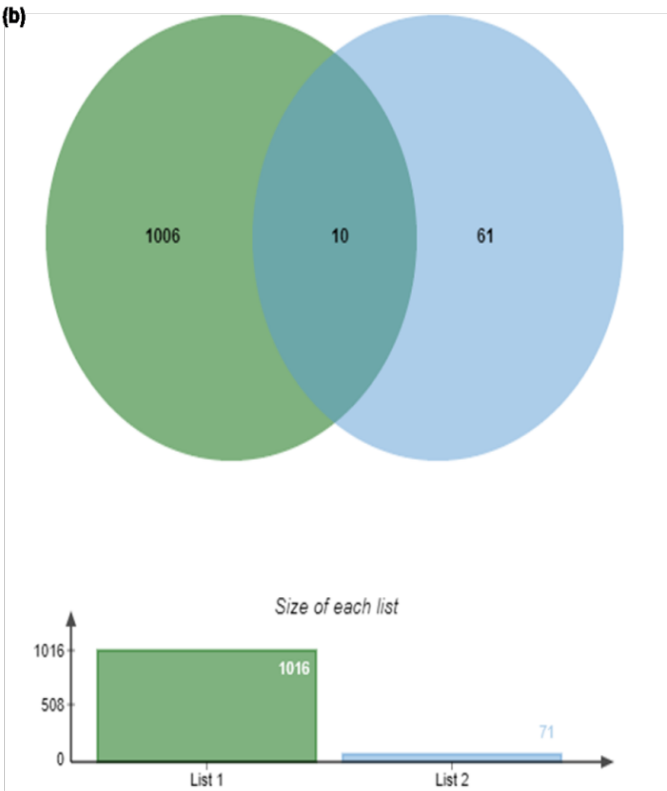

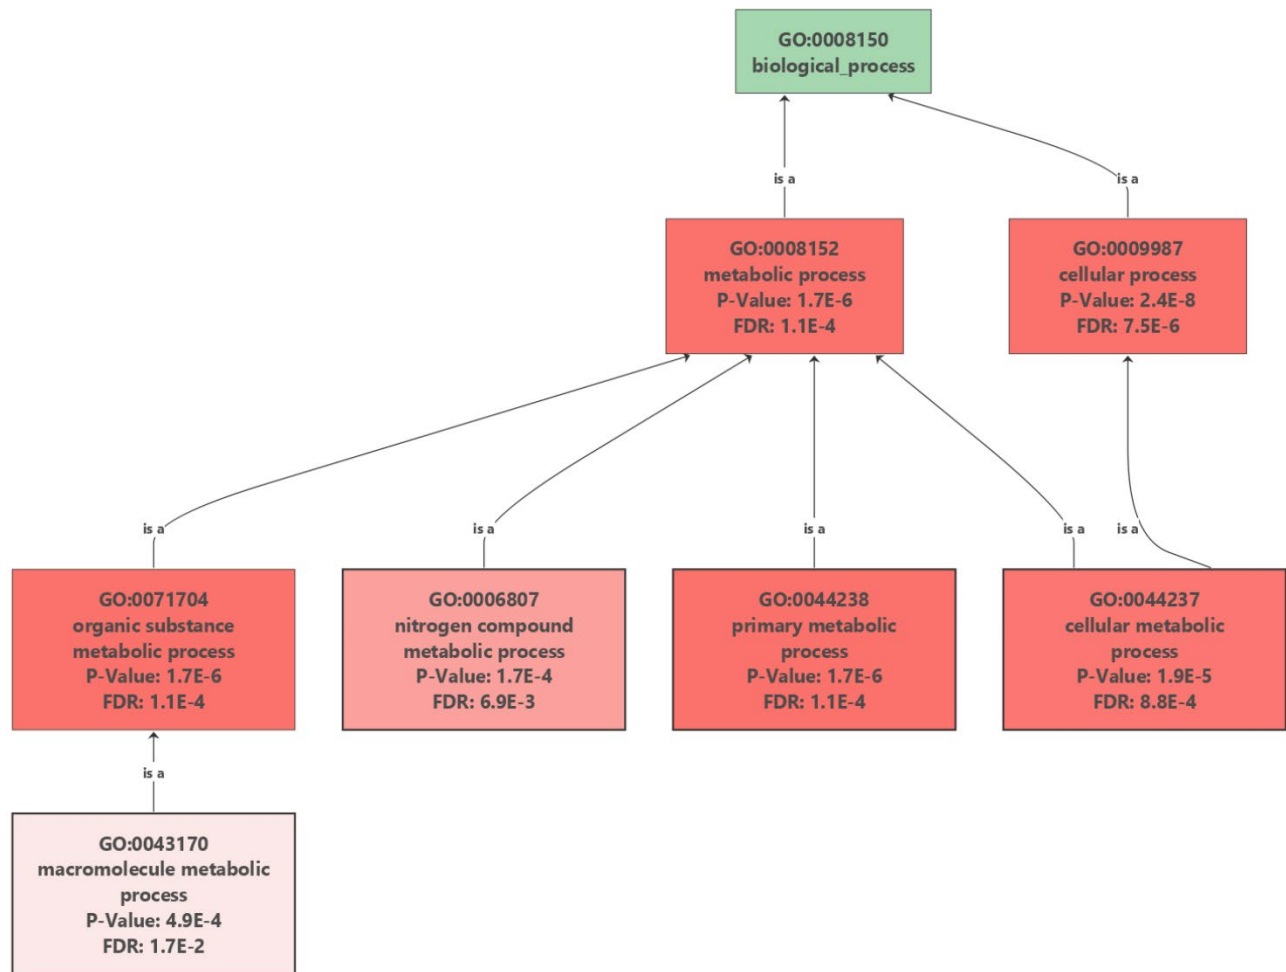



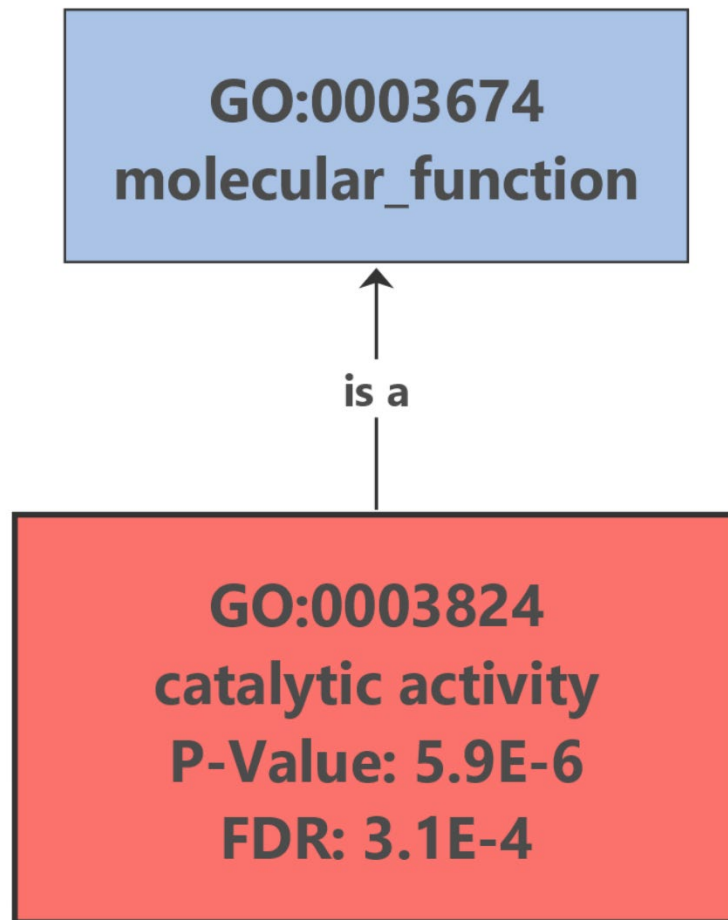

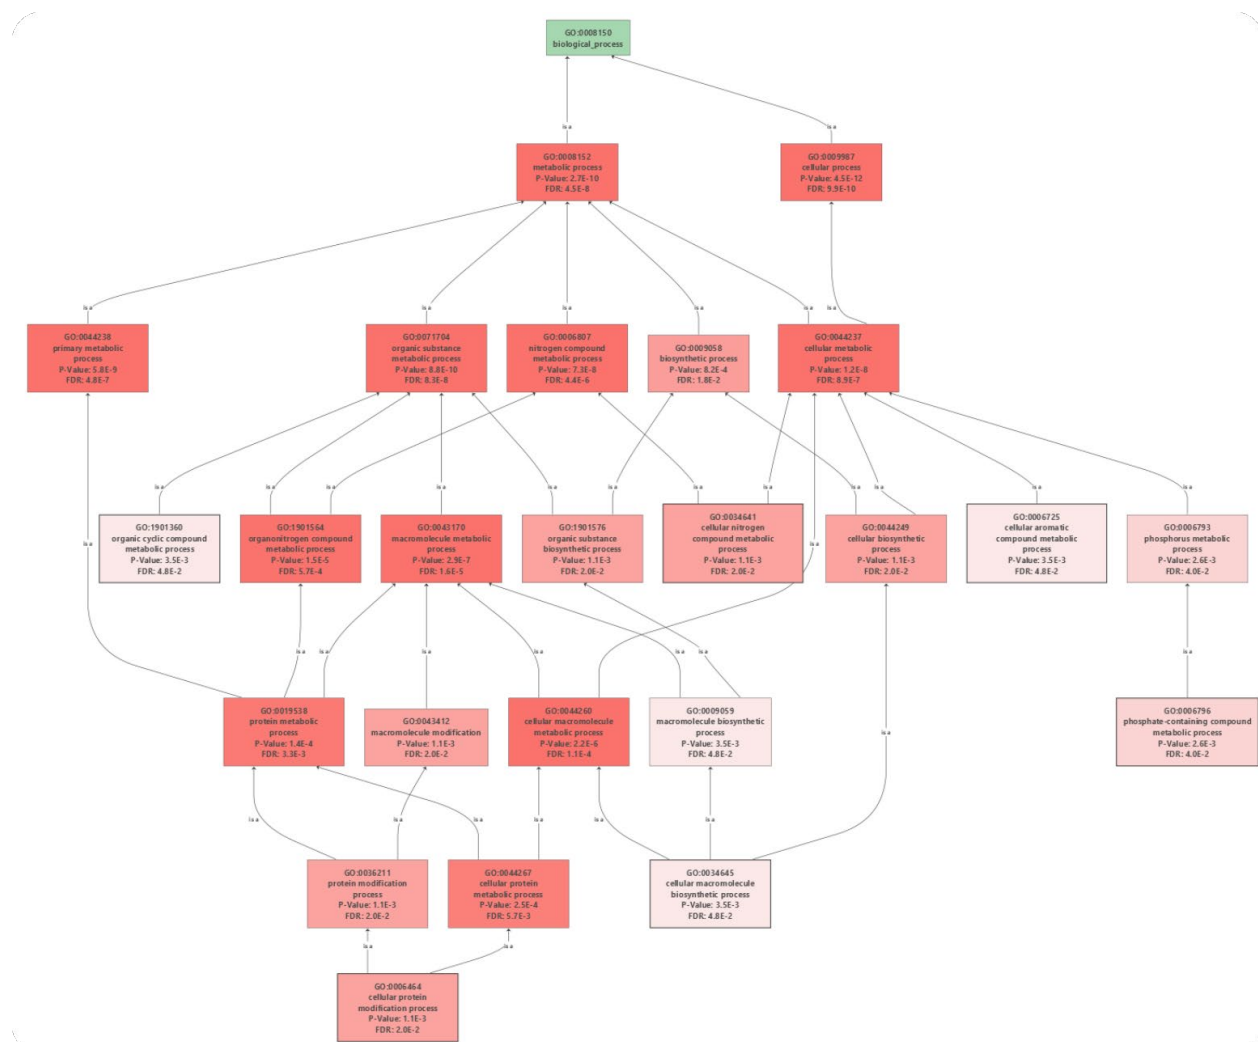

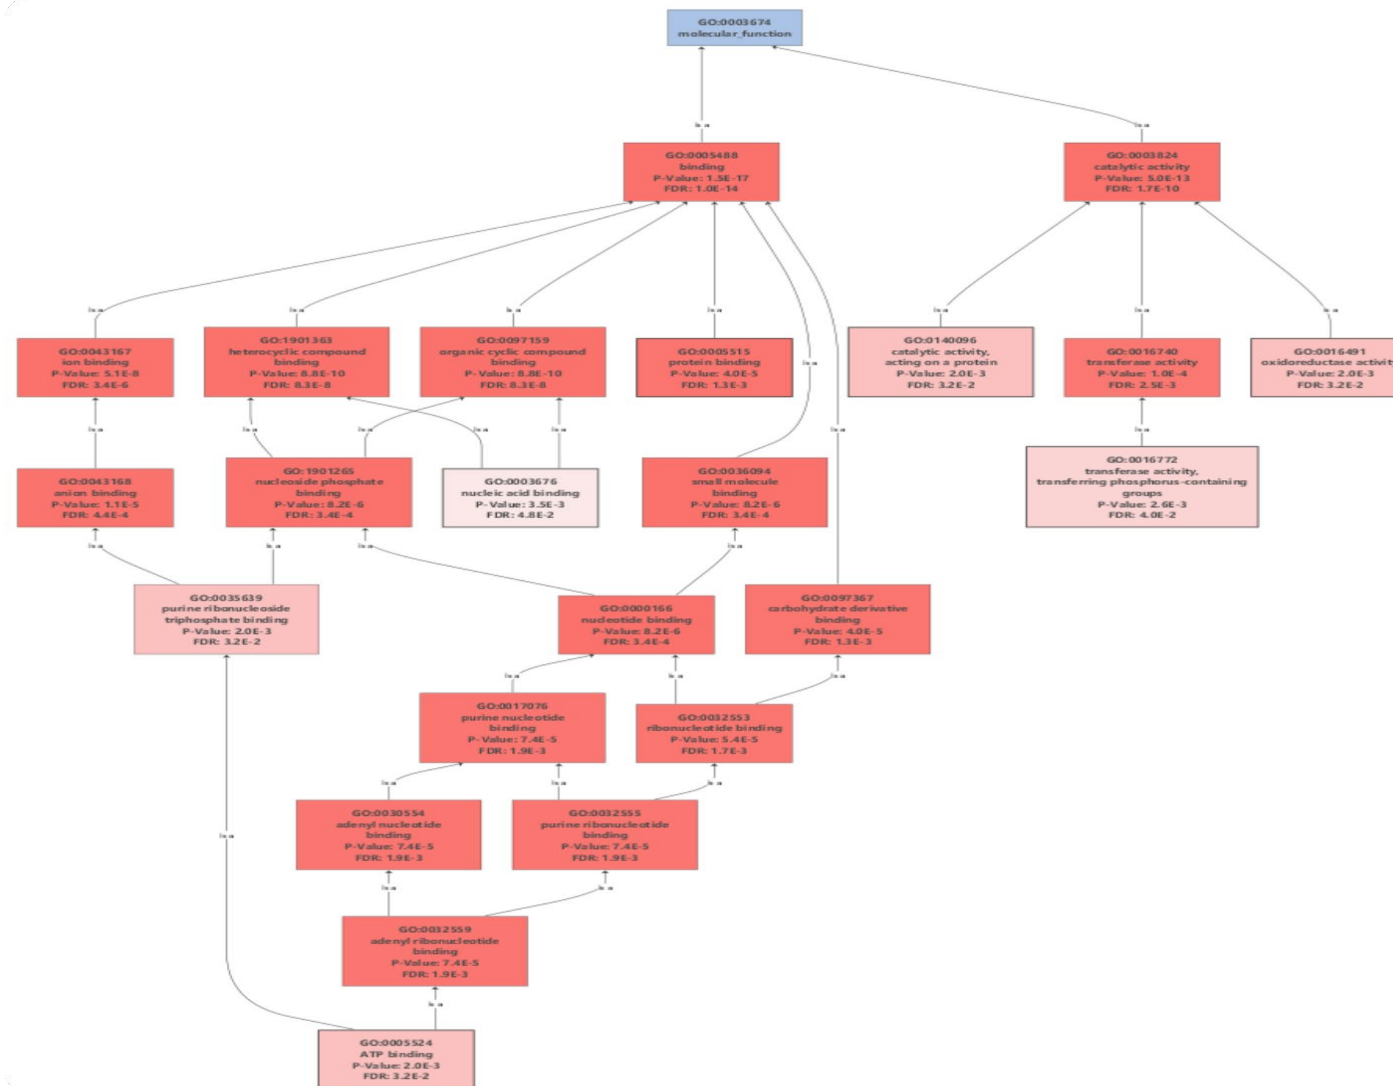

**Supplementary Figure S11.** GO enrichment analysis of molecular function (mf) in SESE. All GO terms are with p-value and FDR, calculated by Blast2GO.
