# Supplementary material for: Selective Sweeps and Polygenic Adaptation Drive Local Adaptation along Moisture and Temperature Gradients in Natural Populations of Coast Redwood and Giant Sequoia
Source: Genes (Basel). 2021 Nov 19;12(11):1826. doi: 10.3390/genes12111826 (PMC8621000; doi:10.3390/genes12111826)
Supplement: Supplementary file 1 [file genes-12-01826-s001.zip › Supplementary Tables.xlsx]

## Sheet: Table S1
Table S1. SNPs statistics before and after imputation for giant sequoia individuals. Number of sites, proportion of missing SNPs before and afer filtering, and after imputation are shown, as well as the proportion of heterogenous sites.
Taxa Name	Number of Sites	Proportion Missing (Original)	Proportion Missing (Filter)	Proportion Missing (%) (Filter)	Proportion Missing (Imputation)	Proportion Missing (%) (Imputation)	Proportion Heterozygous (Original)	Proportion Heterozygous (Filter)	Proportion Heterozygous (Imputation)
11-12-2-S102-L004	577774	0.79109	0.21379	27.0247	0.0585	7.39486	0.39209	0.29329	0.33624
11-13-4-S103-L004	577774	0.77042	0.1255	16.2898	0.02989	3.8797	0.59132	0.43456	0.45923
12-12-1-S105-L004	577774	0.77126	0.14928	19.3553	0.03918	5.08	0.5428	0.39359	0.41942
12-14-1-S106-L004	577774	0.76998	0.14181	18.4174	0.03135	4.07153	0.56415	0.40829	0.43417
12-15-1-S107-L004	577774	0.77484	0.15308	19.7563	0.03122	4.02922	0.53747	0.39836	0.42378
12-17-2-S108-L004	577774	0.77566	0.14768	19.0393	0.0298	3.84189	0.52903	0.38749	0.4133
12-18-1-S109-L004	577774	0.77105	0.15606	20.2399	0.0426	5.52493	0.54894	0.39805	0.42044
13-17-1-S111-L004	577774	0.77162	0.13552	17.563	0.02491	3.22827	0.57758	0.41811	0.43879
13-18-1-S112-L004	577774	0.76949	0.13539	17.5948	0.02769	3.59849	0.58535	0.43237	0.45516
14-11-2-S113-L004	577774	0.77288	0.14417	18.6536	0.0278	3.59694	0.54219	0.39656	0.42462
14-12-2-S114-L004	577774	0.79652	0.21662	27.1958	0.05588	7.01552	0.37206	0.26539	0.32143
14-13-1-S115-L004	577774	0.78057	0.16547	21.1986	0.04043	5.17955	0.51097	0.37079	0.40301
15-12-3-S116-L004	577774	0.799	0.22358	27.9825	0.06292	7.87484	0.35374	0.25083	0.30012
15-13-1-S117-L004	577774	0.76917	0.13501	17.5527	0.0272	3.53628	0.57448	0.41285	0.43712
15-15-2-S119-L004	577774	0.77624	0.14621	18.8357	0.02399	3.09054	0.56221	0.41092	0.43847
15-17-1-S120-L004-E12	577774	0.77234	0.13532	17.5208	0.0235	3.0427	0.58708	0.42853	0.45582
16-12-1-S121-L004	577774	0.78514	0.17395	22.1553	0.04512	5.74675	0.52951	0.39255	0.4229
16-17-4-S122-L004	577774	0.77471	0.14385	18.5682	0.03431	4.42875	0.56526	0.41252	0.43403
16-19-2-S123-L004-G12	577774	0.77337	0.14936	19.3129	0.03654	4.72478	0.56443	0.41457	0.43805
17-13-3-S125-L004	577774	0.77488	0.14394	18.5758	0.02842	3.66766	0.56557	0.41543	0.44261
17-15-1-S127-L004	577774	0.77967	0.14136	18.1307	0.0288	3.69387	0.5542	0.39556	0.41939
17-17-3-S128-L004	577774	0.77005	0.12371	16.0652	0.02493	3.23745	0.60119	0.44678	0.46849
21-12-3-S129-L004	577774	0.77249	0.14388	18.6255	0.02871	3.71655	0.57678	0.435	0.45805
21-16-6-S130-L004-F12	577774	0.77688	0.15432	19.8641	0.03403	4.38034	0.57935	0.43789	0.45864
22-16-2-S131-L004	577774	0.7677	0.13033	16.9767	0.02195	2.85919	0.61982	0.46052	0.48285
22-17-1-S132-L004	577774	0.77003	0.12948	16.8149	0.0274	3.5583	0.60647	0.45642	0.47498
22-20-2-S134-L004	577774	0.78454	0.15291	19.4904	0.02508	3.19678	0.60072	0.43346	0.46092
23-11-2-S136-L004	577774	0.7729	0.12743	16.4873	0.02976	3.85043	0.59245	0.43417	0.45907
23-11-3-S137-L004	577774	0.77757	0.15023	19.3204	0.03416	4.39317	0.55295	0.39745	0.42613
23-11-4-S138-L004	577774	0.77712	0.15179	19.5324	0.03152	4.056	0.54857	0.40813	0.4388
23-12-3-S139-L004	577774	0.77798	0.15017	19.3026	0.03439	4.42042	0.55037	0.41135	0.4385
23-12-4-S140-L004	577774	0.78266	0.15815	20.2067	0.04226	5.39953	0.52245	0.39261	0.41807
23-13-7-S141-L004	577774	0.76948	0.1215	15.7899	0.02648	3.44129	0.61465	0.45647	0.4755
23-8-4-S135-L004	577774	0.78326	0.15862	20.2513	0.04122	5.26262	0.51757	0.3907	0.4161
24-13-1-S142-L004	577774	0.77025	0.12501	16.2298	0.02257	2.93022	0.60423	0.44926	0.46784
25-14-2-S143-L004	577774	0.77191	0.13418	17.3829	0.03218	4.16888	0.6062	0.45315	0.47073
25-15-2-S144-L004	577774	0.77143	0.1269	16.45	0.02008	2.60296	0.61909	0.46577	0.48749
25-19-3-S147-L004	577774	0.76825	0.12801	16.6625	0.02704	3.51969	0.62011	0.46264	0.48299
26-12-1-S149-L004	577774	0.78005	0.16413	21.041	0.04686	6.00731	0.58772	0.43807	0.4584
26-14-1-S151-L004	577774	0.77167	0.13275	17.2029	0.02512	3.25528	0.6012	0.45074	0.47038
26-17-7-S152-L004	577774	0.77865	0.15449	19.8408	0.03414	4.38451	0.60779	0.44358	0.46364
31-11-8-S153-L004	577774	0.77023	0.13896	18.0414	0.02899	3.76381	0.58217	0.42721	0.4485
31-12-6-S154-L004	577774	0.77228	0.14477	18.7458	0.02687	3.47931	0.54873	0.40813	0.43397
31-13-1-S155-L004	577774	0.78071	0.16612	21.2781	0.04176	5.34898	0.50346	0.36327	0.3927
31-13-4-S156-L004-H12	577774	0.77454	0.13679	17.6608	0.0274	3.53758	0.57821	0.42089	0.44768
31-14-3-S157-L004	577774	0.77053	0.13647	17.7112	0.02969	3.85319	0.58858	0.43951	0.46112
32-11-8-S159-L004	577774	0.76761	0.11703	15.246	0.01927	2.51039	0.61826	0.46879	0.48563
32-12-3-S160-L004	577774	0.77111	0.13705	17.7731	0.0267	3.46254	0.6158	0.44958	0.47053
33-12-3-S164-L004	577774	0.77089	0.12514	16.2332	0.01916	2.48544	0.62193	0.46203	0.48272
33-12-4-S165-L004	577774	0.77447	0.14288	18.4487	0.03193	4.12282	0.60227	0.45554	0.47718
33-13-1-S166-L004	577774	0.76884	0.12641	16.4417	0.02442	3.17621	0.63628	0.49221	0.51547
33-13-2-S167-L004	577774	0.76989	0.12513	16.253	0.02735	3.55246	0.61706	0.45669	0.47893
33-13-3-S168-L004	577774	0.7726	0.12592	16.2982	0.02461	3.18535	0.61913	0.46739	0.49086
33-15-3-S169-L004	577774	0.77443	0.13513	17.449	0.0257	3.31857	0.61015	0.44849	0.47194
34-13-8-S170-L004	577774	0.77037	0.13983	18.151	0.03054	3.96433	0.61234	0.44697	0.47001
34-14-1-S171-L004	577774	0.77146	0.1366	17.7067	0.02631	3.41042	0.59886	0.4472	0.4702
36-12-1-S174-L004	577774	0.78422	0.16897	21.5462	0.04331	5.52268	0.51921	0.37905	0.40659
36-13-1-S175-L004	577774	0.77563	0.13171	16.981	0.03169	4.08571	0.59426	0.44255	0.46121
36-14-2-S176-L004	577774	0.76986	0.1239	16.0938	0.02051	2.66412	0.61133	0.45323	0.47482
81-11-4-S177-L004	577774	0.80999	0.26225	32.3769	0.08174	10.0915	0.22547	0.14067	0.23119
81-11-6-S178-L004	577774	0.77702	0.1513	19.4718	0.0344	4.42717	0.51154	0.36833	0.40159
81-11-9-S179-L004	577774	0.7823	0.16906	21.6106	0.0468	5.98236	0.52511	0.38007	0.41458
81-13-1-S180-L004	577774	0.77756	0.16068	20.6646	0.03963	5.09671	0.5333	0.3856	0.41417
82-12-1-S182-L004	577774	0.78946	0.19812	25.0956	0.05114	6.47785	0.46647	0.33971	0.37779
82-13-1-S183-L004	577774	0.77256	0.13926	18.0258	0.02601	3.36673	0.58575	0.43339	0.4567
82-17-1-S184-L004	577774	0.772	0.13156	17.0415	0.02369	3.06865	0.58761	0.44385	0.46832
82-17-3-S185-L004	577774	0.77093	0.12645	16.4023	0.02214	2.87186	0.6062	0.45252	0.47371
83-12-1-S186-L004	577774	0.79171	0.2069	26.1333	0.05326	6.72721	0.42055	0.30521	0.34175
84-12-6-S188-L004	577774	0.77069	0.14139	18.3459	0.02778	3.60456	0.6018	0.45504	0.47611
85-11-2-S189-L004	577774	0.80938	0.25401	31.3833	0.07815	9.65554	0.25502	0.17798	0.24899
85-12-1-S190-L004	577774	0.79709	0.20888	26.2053	0.05615	7.04437	0.36545	0.26031	0.30545

## Sheet: Table S2
Table S2. SNPs statistics before and after imputation for coast redwood individuals. Number of sites, proportion of missing SNPs before and afer filtering, and after imputation are shown, as well as the proportion of heterogenous sites.
Taxa Name	Number of Sites	Proportion Missing (Original)	Proportion Missing (Filter)	Proportion Missing (%) (Filter)	Proportion Missing (Imputation)	Proportion Missing (%) (Imputation)	Proportion Heterozygous (Original)	Proportion Heterozygous (Filter)	Proportion Heterozygous (Imputation)
A_01_5_14_S1	803738	0.90287	0.42275	46.8229	0.06545	7.24911	0.75685	0.80713	0.82577
C_02_1_10_S2	803738	0.89794	0.33957	37.8166	0.03045	3.3911	0.76591	0.81487	0.82657
C_03_1_6_S3	803738	0.89786	0.34147	38.0315	0.03387	3.7723	0.75999	0.8123	0.82292
C_04_2_7_S4	803738	0.90518	0.40523	44.7679	0.05849	6.4617	0.74304	0.80282	0.82784
D_01_7_S5	803738	0.90057	0.37869	42.05	0.0428	4.75255	0.76377	0.81284	0.82582
D_01_8_3_S6	803738	0.90332	0.40253	44.5612	0.05246	5.80747	0.74812	0.80659	0.82886
D_03_1_6_S7	803738	0.90803	0.39967	44.0151	0.06848	7.5416	0.74878	0.8039	0.82055
D_03_2_7_S8	803738	0.9039	0.38861	42.9926	0.03867	4.27813	0.76002	0.80958	0.83082
D_03_5_9_S9	803738	0.90762	0.41877	46.1394	0.07233	7.96919	0.753	0.80121	0.82295
D_04_1_7_S10	803738	0.90714	0.42843	47.2287	0.06453	7.11357	0.74029	0.78912	0.81843
D_04_5_S11	803738	0.90919	0.44362	48.7929	0.05498	6.04714	0.74303	0.79388	0.82757
D_05_3_19_S12	803738	0.904	0.40801	45.1338	0.0646	7.14602	0.7489	0.796	0.81731
D_06_3_4_S13	803738	0.902	0.40246	44.6186	0.05722	6.34368	0.75085	0.80001	0.82345
D_06_4_11_S14	803738	0.89646	0.34564	38.5561	0.02883	3.21598	0.76196	0.81825	0.82934
D_08_1_7_S15	803738	0.91707	0.46045	50.2088	0.09905	10.8007	0.74704	0.79414	0.81783
H_07_3_3_S16	803738	0.90854	0.42165	46.4096	0.07137	7.85546	0.74667	0.79752	0.82056
H_07_4_12_S17	803738	0.90441	0.37974	41.9876	0.05657	6.25491	0.75793	0.81112	0.82296
H_08_1_1_S18	803738	0.9023	0.36222	40.1441	0.0472	5.23108	0.75961	0.81336	0.82201
H_09_4_4_S19	803738	0.90009	0.39758	44.1711	0.03888	4.31957	0.757	0.80931	0.83096
H_12_2_11_S20	803738	0.90333	0.39163	43.354	0.04974	5.50629	0.74747	0.80324	0.82181
H_13_1_4_S21	803738	0.90176	0.37183	41.2338	0.05217	5.78535	0.76285	0.8155	0.82742
H_15_1_15_S22	803738	0.8988	0.3531	39.2857	0.04133	4.59835	0.76714	0.81786	0.8245
H_16_2_S23	803738	0.89966	0.3837	42.6494	0.04152	4.61508	0.75548	0.80367	0.82342
H_18_1_S24	803738	0.89985	0.36373	40.4212	0.0354	3.93399	0.76374	0.82038	0.83221
H_22_1_2_S25	803738	0.91099	0.45001	49.3979	0.06929	7.60601	0.744	0.79953	0.82279
H_22_2_10_S26	803738	0.90564	0.4389	48.463	0.05463	6.0322	0.73094	0.78453	0.82132
L_01_4_2_S27	803738	0.91788	0.46358	50.5055	0.12671	13.8046	0.76939	0.79999	0.81852
M_01_4_10_S28	803738	0.89419	0.36263	40.554	0.02581	2.88641	0.75108	0.80906	0.83027
M_01_5_5_S29	803738	0.91063	0.40645	44.6339	0.07722	8.47984	0.75502	0.80424	0.81812
M_02_2_6_S30	803738	0.91365	0.4197	45.9366	0.09227	10.0991	0.75637	0.80371	0.81926
M_03_3_9_S31	803738	0.91128	0.45346	49.7608	0.07393	8.11276	0.74887	0.7939	0.82393
M_05_2_4_S32	803738	0.90487	0.39405	43.5477	0.045	4.97309	0.75789	0.80981	0.82588
M_07_1_1_S33	803738	0.90064	0.3812	42.3255	0.05002	5.55383	0.76572	0.80698	0.8192
M_07_2_8_S34	803738	0.90767	0.41809	46.0619	0.05699	6.27871	0.74399	0.80084	0.82089
M_08_2_S35	803738	0.90091	0.36258	40.246	0.0423	4.69525	0.76096	0.81404	0.82473
M_09_1_S36	803738	0.90051	0.38523	42.7791	0.05299	5.88444	0.76446	0.81499	0.82916
M_09_2_7_S37	803738	0.89704	0.3556	39.6415	0.0335	3.7345	0.76035	0.81559	0.82983
M_10_1_11_S38	803738	0.90108	0.42652	47.3343	0.05291	5.87184	0.75094	0.79879	0.82782
M_10_2_2_S39	803738	0.8994	0.40672	45.2213	0.05417	6.0229	0.75081	0.80101	0.82681
M_12_1_7_S40	803738	0.90518	0.41219	45.5368	0.04504	4.97581	0.76353	0.80989	0.83044
M_12_2_7_S41	803738	0.90681	0.38577	42.5414	0.05632	6.21078	0.75612	0.80499	0.81716
M_13_6_3_S42	803738	0.90998	0.44593	49.0044	0.06661	7.31994	0.73704	0.78239	0.81758
M_14_14_S43	803738	0.90623	0.40575	44.7734	0.06507	7.1803	0.75659	0.81013	0.82675
M_15_1_S44	803738	0.91016	0.43459	47.7487	0.08445	9.27859	0.76402	0.80428	0.82335
M_15_2_3_S45	803738	0.90365	0.4148	45.9027	0.05221	5.77768	0.7489	0.80137	0.82289
M_16_2_5_S46	803738	0.90328	0.4067	45.0248	0.06514	7.2115	0.75343	0.80168	0.82084
M_16_3_S47	803738	0.91025	0.46152	50.7026	0.07992	8.78001	0.7518	0.78854	0.8206
M_17_2_15_S48	803738	0.89701	0.35506	39.5826	0.03099	3.45481	0.75321	0.82069	0.83052
M_18_1_14_S49	803738	0.90912	0.4378	48.1565	0.07238	7.96155	0.75428	0.80918	0.83033
M_18_2_2_S50	803738	0.91031	0.42848	47.0697	0.06611	7.26236	0.75222	0.80143	0.82147
M_19_1_9_S51	803738	0.90189	0.38828	43.0518	0.04383	4.85979	0.76744	0.81381	0.82946
M_19_2_S52	803738	0.90322	0.41059	45.4585	0.04566	5.05525	0.76112	0.80464	0.82854
N_01_4_4_S53	803738	0.90421	0.38695	42.7943	0.05593	6.18551	0.75262	0.80657	0.82098
N_01_5_4_S54	803738	0.90004	0.38451	42.7214	0.05353	5.94751	0.76681	0.81468	0.82746
N_02_1_3_S55	803738	0.90147	0.38312	42.4995	0.05291	5.8693	0.75462	0.80553	0.81932
N_02_2_13_S56	803738	0.90543	0.41544	45.8832	0.06227	6.8774	0.75901	0.80475	0.82288
N_03_2_4_S57	803738	0.90271	0.3789	41.9736	0.05609	6.21351	0.77185	0.81832	0.82399
N_03_4_7_S58	803738	0.90028	0.37599	41.7637	0.05026	5.58271	0.77251	0.81749	0.82485
N_04_2_S59	803738	0.90274	0.39387	43.6305	0.05952	6.59326	0.75503	0.80276	0.81841
N_05_2_2_S60	803738	0.90507	0.41142	45.4573	0.06501	7.18287	0.75954	0.80835	0.82669
R_01_1_8_S61	803738	0.90037	0.38594	42.8646	0.05277	5.86092	0.76739	0.80356	0.81632
R_02_2_10_S62	803738	0.90196	0.38464	42.6449	0.06487	7.19211	0.7717	0.81898	0.82704
R_02_4_2_S63	803738	0.90532	0.41998	46.3902	0.05187	5.72947	0.74852	0.79953	0.82266
S_01_1_1_S64	803738	0.91079	0.45869	50.3618	0.08632	9.47749	0.75361	0.78629	0.81442
S_01_2_S65	803738	0.90337	0.40208	44.5089	0.05619	6.22004	0.75936	0.80833	0.82448
S_02_2_3_S66	803738	0.90426	0.39789	44.0017	0.05638	6.23493	0.76402	0.8131	0.82814
S_03_1_8_S67	803738	0.89952	0.39644	44.0724	0.05882	6.53904	0.77063	0.82334	0.83466
S_03_2_1_S68	803738	0.90405	0.42276	46.7629	0.05229	5.78397	0.7542	0.80018	0.82592
S_04_3_26_S69	803738	0.89892	0.38269	42.5722	0.04511	5.01824	0.75578	0.80086	0.8219
S_05_1_2_S70	803738	0.90123	0.37479	41.5865	0.0485	5.38153	0.75979	0.81289	0.82417
S_05_2_12_S71	803738	0.90316	0.38116	42.2029	0.04972	5.50512	0.7561	0.80722	0.82242
T_01_1_4_S72	803738	0.89858	0.37493	41.7247	0.04839	5.38516	0.76664	0.81827	0.82817
T_02_2_6_S73	803738	0.90343	0.40442	44.765	0.0632	6.99556	0.76317	0.81128	0.82322
Y_01_2_3_S74	803738	0.89921	0.37822	42.0614	0.04734	5.26462	0.77763	0.82667	0.83077
Y_01_3_1_S75	803738	0.89888	0.37536	41.7586	0.04221	4.69584	0.77725	0.82362	0.83297
Y_03_3_S76	803738	0.89666	0.35683	39.7955	0.03494	3.89668	0.76764	0.82181	0.83174
Y_03_4_4_S77	803738	0.89991	0.36049	40.0585	0.03679	4.08819	0.76426	0.817	0.82737
Y_04_1_S78	803738	0.89873	0.37067	41.2438	0.04347	4.83683	0.77329	0.82315	0.82984
Y_05_2_3_S79	803738	0.90023	0.37014	41.1162	0.04341	4.8221	0.75951	0.81032	0.82174
Y_05_4_1_S80	803738	0.90183	0.39167	43.4306	0.05835	6.47018	0.76239	0.81147	0.82313
Y_06_3_2_S81	803738	0.90427	0.41008	45.3493	0.0626	6.92271	0.76886	0.8173	0.82832
Y_06_4_10_S82	803738	0.90609	0.41976	46.3265	0.05511	6.08218	0.76007	0.81003	0.82295
Y_08_1_8_S83	803738	0.90336	0.40671	45.0219	0.0547	6.05517	0.76616	0.81599	0.82841
Y_08_2_7_S84	803738	0.89941	0.38828	43.1705	0.04605	5.12002	0.76765	0.81652	0.82964
Y_09_1_16_S85	803738	0.89186	0.34518	38.7034	0.03456	3.87505	0.77531	0.82611	0.83176
Y_09_2_7_S86	803738	0.9105	0.44078	48.4108	0.08845	9.71444	0.7695	0.81151	0.82475
Y_10_1_5_S87	803738	0.90268	0.40184	44.5163	0.06572	7.28054	0.77867	0.83181	0.83795
Y_10_3_S88	803738	0.9005	0.37817	41.9956	0.04719	5.24042	0.7724	0.81826	0.83029
Z_01_2_S89	803738	0.90938	0.40476	44.5094	0.07013	7.71185	0.77202	0.81926	0.82786
Z_02_6_14_S90	803738	0.90768	0.39925	43.9858	0.06946	7.65248	0.77626	0.82065	0.82609
Z_03_1_3_S91	803738	0.9022	0.41894	46.4354	0.06102	6.76347	0.76012	0.80279	0.82482
Z_04_2_2_S92	803738	0.90642	0.41212	45.4668	0.05311	5.85931	0.76734	0.81612	0.8298

## Sheet: Table S3
Table S3. Genomic location of selective sweeps in the genome of giant sequoia identified by non-overlapping sliding windows. BIN start and end indicate the genomic location of the sweeps in the chromosomes of the species; N_Variants indicate the number of SNPs in that genomic location; FST is the fixation index; PI is the nucleotide diversity; TajimaD shows the results of Tajima’s D test; Genes s…
Percentage is the Percentage of Identity in the BLAST search; Similarity Search is the NCBI gene ID; and Description, KEGG Description and KEGG pathways show the functional annotation of the genes. Last three columns in the table are the different gene ontology levels.
CHROM	BIN_START	BIN_END	N_VARIANTS	FST	PI	TajimaD	Genes	CDS	Percentage	Similarity Search	Description	KEGG Description	KEGG Pathways	Gene Ontology: Biological Process	Gene Ontology: Cellular Process	Gene Ontology: Molecular Function
1	148970001	148980000	5	0.148419	7.5e-05	-0.297144	SEGI_33573	SEGI_01643	81, 50	XP_039065704.1, XP_024537319.1	Expansin-A10-like; Exocyst complex component	Expansin-A10, Exocyst complex component EXO70A1-like	Insulin signaling pathway,Salmonella infection	GO:0009987-cellular_process(L=1),GO:0044699-single-organism_process(L=1),GO:0051179-localization(L=1),	GO:0005623-cell(L=1),GO:0032991-macromolecular_complex(L=1),GO:0043226-organelle(L=1),	NA
1	149020001	149030000	2	0.140737	2.2e-05	-0.514404	SEGI_29898	SEGI_29898	66	XP_002518528.1	Xyloglucan endotransglucosylase/hydrolase	Xyloglucan:xyloglucosyl transferase		GO:0008152-metabolic_process(L=1),GO:0009987-cellular_process(L=1),	GO:0005576-extracellular_region(L=1),GO:0005623-cell(L=1),	GO:0003824-catalytic_activity(L=1),
1	149060001	149070000	3	0.110255	3.07e-05	-0.647418	.	.	-	-	-	-	-	-	-	-
1	149460001	149470000	4	0.136753	3.66e-05	-0.86805	SEGI_11024	SEGI_29898	65, 66	AKH04258.1, XP_002518528.1	Alcohol dehydrogenase; xyloglucan endotransglucosylase/hydrolase	Secoisolariciresinol dehydrogenase-like, Xyloglucan:xyloglucosyl transferase	Glycosyltransferases	GO:0008152-metabolic_process(L=1),GO:0009987-cellular_process(L=1),	GO:0005576-extracellular_region(L=1),GO:0005623-cell(L=1),	GO:0003824-catalytic_activity(L=1),
1	149510001	149520000	2	0.136753	1.83e-05	-0.669298	SEGI_15829	SEGI_15829	58	XP_038981362.1	Inorganic pyrophosphatase 2-like	Pyridoxal phosphate phosphatase	Vitamin B6 metabolism,Metabolic pathways	GO:0008152-metabolic_process(L=1),GO:0009987-cellular_process(L=1),GO:0044699-single-organism_process(L=1),GO:0050896-response_to_stimulus(L=1),GO:0071840-cellular_component_organization_or_biogenesis(L=1),	-	GO:0003824-catalytic_activity(L=1),GO:0005488-binding(L=1),
1	149790001	149800000	3	0.104164	4.72e-05	-0.106644	SEGI_06014	SEGI_06014	67	XP_009382296.1	Methyltransferase PMT13	Homogalacturonan methyltransferase	Methyltransferases	GO:0008152-metabolic_process(L=1),GO:0009987-cellular_process(L=1),GO:0044699-single-organism_process(L=1),GO:0071840-cellular_component_organization_or_biogenesis(L=1),	GO:0005623-cell(L=1),GO:0016020-membrane(L=1),GO:0043226-organelle(L=1),	GO:0003824-catalytic_activity(L=1),
1	282320001	282330000	4	0.116772	3.06e-05	-0.76619	SEGI_04817	SEGI_04817	90	XP_041024165.1	Urease accessory protein G	Urease accessory protein	Protein processing	GO:0008152-metabolic_process(L=1),GO:0009987-cellular_process(L=1),GO:0065007-biological_regulation(L=1),	GO:0005623-cell(L=1),GO:0016020-membrane(L=1),	GO:0003824-catalytic_activity(L=1),GO:0005488-binding(L=1),GO:0016530-metallochaperone_activity(L=1),
1	516880001	516890000	13	0.110493	0.00017412	-0.3093	.	.	-	-	-	-	-	-	-	-
2	332490001	332500000	4	0.105809	6.6e-05	-0.103308	.	.	-	-	-	-	-	-	-	-
2	781100001	781110000	10	0.127584	7.91e-05	-0.874064	.	.	-	-	-	-	-	-	-	-
3	379010001	379020000	5	0.110454	6.49e-05	-0.526342	SEGI_06563	SEGI_06563	57	XP_023892426.1	Pentatricopeptide_repeat-containing_protein	Pentatricopeptide repeat-containing protein	-	GO:0008152-metabolic_process(L=1),	-	GO:0003824-catalytic_activity(L=1),GO:0005488-binding(L=1),
3	379150001	379160000	8	0.108987	0.00010309	-0.590696	SEGI_11461	SEGI_11461	79	XP_021905346.1	NAD(P)H-ubiquinone oxidoreductase A1, mitochondrial-like	NADH:ubiquinone reductase	Acting on NADH or NADPH	GO:0008152-metabolic_process(L=1),GO:0009987-cellular_process(L=1),GO:0044699-single-organism_process(L=1),GO:0050896-response_to_stimulus(L=1),	GO:0005623-cell(L=1),GO:0016020-membrane(L=1),GO:0043226-organelle(L=1),	GO:0003824-catalytic_activity(L=1),GO:0005488-binding(L=1),
3	379160001	379170000	4	0.104586	5.03e-05	-0.450639	SEGI_11461	SEGI_11461	79	XP_021905346.1	NAD(P)H-ubiquinone oxidoreductase A1, mitochondrial-like	NADH:ubiquinone reductase	Acting on NADH or NADPH	GO:0008152-metabolic_process(L=1),GO:0009987-cellular_process(L=1),GO:0044699-single-organism_process(L=1),GO:0050896-response_to_stimulus(L=1),	GO:0005623-cell(L=1),GO:0016020-membrane(L=1),GO:0043226-organelle(L=1),	GO:0003824-catalytic_activity(L=1),GO:0005488-binding(L=1),
3	650780001	650790000	2	0.103824	2.88e-05	-0.295344	SEGI_37702	SEGI_37702	42	XP_009354827.1	Glutathione S-transferase	Glutathione S-transferase	Glutathione metabolism, Metabolism of xenobiotics by cytochrome P450,Metabolic pathways,Longevity regulating pathway	GO:0008152-metabolic_process(L=1),GO:0009987-cellular_process(L=1),GO:0044699-single-organism_process(L=1),GO:0050896-response_to_stimulus(L=1),GO:0065007-biological_regulation(L=1),	GO:0005576-extracellular_region(L=1),GO:0005623-cell(L=1),GO:0016020-membrane(L=1),GO:0043226-organelle(L=1),	GO:0003824-catalytic_activity(L=1),GO:0005488-binding(L=1),GO:0016209-antioxidant_activity(L=1),
4	250710001	250720000	3	0.103655	4.46e-05	-0.176394	SEGI_08514	SEGI_08514	48	XP_006848591.2	Uncharacterized_protein	Uncharacterized_protein	-	-	-	-
4	521510001	521520000	2	0.121958	3.07e-05	-0.184394	.	.	-	-	-	-	-	-	-	-
5	476020001	476030000	6	0.210332	7.45e-05	-0.463182	.	.	-	-	-	-	-	-	-	-
7	305070001	305080000	2	0.109685	3.14e-05	-0.0351081	SEGI_23557	SEGI_23557	34	XP_031116256	TMV_resistance_protein_N-like	TMV resistance protein N-like	NA	GO:0009987-cellular_process(L=1),GO:0023052-signaling(L=1),GO:0044699-single-organism_process(L=1),GO:0050896-response_to_stimulus(L=1),GO:0065007-biological_regulation(L=1),
8	86890001	86900000	4	0.187832	5.29e-05	-0.0570518	SEGI_04618	SEGI_04618	84	QHZ00920.1	Terpene synthase 13	Terpinolene synthase	terpinolene synthase	GO:0008152-metabolic_process(L=1),GO:0009987-cellular_process(L=1),GO:0050896-response_to_stimulus(L=1),GO:0051704-multi-organism_process(L=1),	GO:0005623-cell(L=1),GO:0043226-organelle(L=1),	GO:0003824-catalytic_activity(L=1),GO:0005488-binding(L=1),
8	213240001	213250000	2	0.140613	3.3e-05	-0.0892549	SEGI_04577	SEGI_04577	72	XP_039115062.1	RCC1 domain-containing protein RUG3, mitochondrial isoform	E3 ubiquitin-protein ligase HERC3	Ubiquitin mediated proteolysis	GO:0008152-metabolic_process(L=1),GO:0009987-cellular_process(L=1),GO:0044699-single-organism_process(L=1),GO:0071840-cellular_component_organization_or_biogenesis(L=1),	GO:0005623-cell(L=1),GO:0043226-organelle(L=1),	GO:0003824-catalytic_activity(L=1),
8	369990001	370000000	2	0.122228	1.31e-05	-0.406352	SEGI_31026	SEGI_31026	85	MCI02725.1	Clathrin_heavy_chain	Clathrin heavy chain 1-like	Lysosome,Endocytosis,Synaptic vesicle cycle,Bacterial invasion of epithelial cells	GO:0000003-reproduction(L=1),GO:0002376-immune_system_process(L=1),GO:0008152-metabolic_process(L=1),GO:0009987-cellular_process(L=1),GO:0022610-biological_adhesion(L=1),GO:0023052-signaling(L=1),GO:0032501-multicellular_organismal_process(L=1),GO:0032502-developmental_process(L=1),GO:0040011-locomotion(L=1),GO:0044699-single-organism_process(L=1),GO:0050896-response_to_stimulus(L=1),GO:0051179-l…	GO:0005576-extracellular_region(L=1),GO:0005623-cell(L=1),GO:0016020-membrane(L=1),GO:0030054-cell_junction(L=1),GO:0032991-macromolecular_complex(L=1),GO:0043226-organelle(L=1),GO:0045202-synapse(L=1),GO:0055044-symplast(L=1),	GO:0003824-catalytic_activity(L=1),GO:0004871-signal_transducer_activity(L=1),GO:0005198-structural_molecule_activity(L=1),GO:0005215-transporter_activity(L=1),GO:0005488-binding(L=1),GO:0060089-molecular_transducer_activity(L=1),
10	271070001	271080000	9	0.137318	0.000157718	-0.0311075	.	.	-	-	-	-	-	-	-	-
10	283280001	283290000	2	0.167707	3.14e-05	-0.0351081	SEGI_34131	SEGI_34131	49	XP_021897465.1	ATP-dependent_RNA_helicase	ATP-dependent RNA helicase FAL1 isoform	RNA transport	-	-	-
11	95200001	95210000	2	0.132737	2.19e-05	-0.412918	*	*	-	-	-	-	-	-	-	-
*SEGI_29752 located at 95210489

## Sheet: Table S4
Table S4. Genomic location of selective sweeps in the genome of coast redwood identified by non-overlapping sliding windows. BIN start and end indicate the genomic location of the sweeps in the scaffolds of the species; N_Variants indicate the number of SNPs in that genomic location; FST is the fixation index; PI is the nucleotide diversity; TajimaD shows the results of Tajima’s D test; Genes sho…
Scaffold	BIN_Start	BIN_End	N_Variants	FST	PI	TajimaD	Genes	CDS	Percentage	Similarity Search	Description	KEGG Description	KEGG Pathways	Gene Ontology: Biological Process	Gene Ontology: Cellular Process	Gene Ontology: Molecular Function
SCAFFOLD_142490	238872001	238931000	40	0.126732	1.81e-06	-0.189549	SESE_103346	SESE_103346	68.83	XP_006846538.1	Transmembrane protein 120	Transmembrane protein 120A	Ribosome biogenesis in eukaryotes	GO:0016020-membrane(L=1),	-	-
SCAFFOLD_143733	1	5001	6	0.113884	6.25e-06	-0.233625	.	.	-	-	-	-	-	-	-	-
SCAFFOLD_144279	54490001	54509000	10	0.19964	3.07e-06	-0.297647	SESE_073730	SESE_073730	77.09	AAR21073.1	PR5 allergen Cup s 3.1 precursor	Thaumatin-like protein	-
SCAFFOLD_152400	203151001	203170000	47	0.220265	1.02e-05	-0.514985	.	.	-	-	-	-	-	-	-	-
SCAFFOLD_153330	1001	20000	10	0.182433	2.35e-06	-0.113491	.	.	-	-	-	-	-	-	-	-
SCAFFOLD_177458	269487001	269506000	10	0.151058	7.37e-06	-0.201018	.	.	-	-	-	-	-	-	-	-
SCAFFOLD_177458	309590001	309610000	30	0.16194	1.02e-06	-0.458393	.	.	-	-	-	-	-	-	-	-
SCAFFOLD_195192	342931001	342950000	10	0.134287	7.54e-06	-0.352137	.	.	-	-	-	-	-	-	-	-
SCAFFOLD_203021	137861001	137880000	10	0.152765	2.41e-06	-0.371725	.	.	-	-	-	-	-	-	-	-
SCAFFOLD_203021	955005001	955024000	10	0.169695	3.37e-06	-0.151349	SESE_038676	SESE_038676	58.8	PON81944.1	Formiminotransferase catalytic domain	Glutamate formiminotransferase	Histidine metabolism,Metabolic pathways	GO:0008152-metabolic_process(L=1),	-	GO:0003824-catalytic_activity(L=1),GO:0005488-binding(L=1),
SCAFFOLD_203021	965153001	965172000	10	0.111391	9.55e-06	-0.411902	.	.	-	-	-	-	-	-	-	-
SCAFFOLD_251294	154353001	155340000	22	0.352757	1.33e-06	-0.282626	SESE_100182, SESE_021453	SESE_100182	48.24;64.62	XP_010061131.2;XP_020519027.1	Uncharacterized protein LOC104448891;cinnamoyl-CoA reductase 1 isoform	Uncharacterized protein LOC104448891;Cinnamoyl-CoA reductase 2 isoform X1	-	-	-	-
SCAFFOLD_274470	76721001	76740000	10	0.186829	1.52e-06	-0.364514	.	.	-	-	-	-	-	-	-	-
SCAFFOLD_327349	130944001	130961000	8	0.209005	9.21e-06	-0.224018	SESE_107388	SESE_107388	70.85	XP_016468442.1	Protein DJ-1 homolog D-like	Protein DJ-1 homolog D-like	Pyruvate metabolism,Metabolic pathways,Microbial metabolism in diverse environments	GO:0008152-metabolic_process(L=1),GO:0009987-cellular_process(L=1),		GO:0003824-catalytic_activity(L=1),
SCAFFOLD_333177	36001	55000	10	0.413201	1.21e-05	-0.0776007	.	.	-	-	-	-	-	-	-	-
SCAFFOLD_343581	195881001	195900000	10	0.148287	6.25e-06	-0.233625	SESE_032271	SESE_032271	85.23	XP_030464388.1	UDP-xylose transporter 3	UDP-xylose transporter 3	Transporters	-	-	-
SCAFFOLD_343581	49530001	49841000	30	0.183361	1.66e-06	-0.415029	SESE_023539	.	-	-	-	-	-	-	-	-
SCAFFOLD_343581	785329001	787230001	10	0.188898	2.41e-06	-0.371725	SESE_026869	SESE_026869	56.59	XP_031278434.1	Reticulon-like protein B5	Reticulon-like protein B13	Membrane trafficking	GO:0009987-cellular_process(L=1),GO:0044699-single-organism_process(L=1),GO:0071840-cellular_component_organization_or_biogenesis(L=1),	GO:0005623-cell(L=1),GO:0016020-membrane(L=1),GO:0043226-organelle(L=1),	-
SCAFFOLD_353338	1026420001	1027757000	10	0.162002	2.87e-06	-0.544357	.	.	-	-	-	-	-	-	-	-
SCAFFOLD_353338	691305001	691324000	10	0.10108	8.04e-06	-0.125884	.	.	-	-	-	-	-	-	-	-
SCAFFOLD_36326	3285001	3304000	10	0.123795	6.74e-06	-0.282626	.	.	-	-	-	-	-	-	-	-
SCAFFOLD_38659	138001	157000	10	0.115275	1.79e-05	-0.270614	SESE_063418	SESE_063418	-	-	-	-	-	-	-	-
SCAFFOLD_387868	794150001	794169000	10	0.102224	7.64e-06	-0.0876633	.	.	-	-	-	-	-	-	-	-
SCAFFOLD_387868	848491001	848510000	10	0.209004	3.71e-06	-0.409799	.	.	-	-	-	-	-	-	-	-
SCAFFOLD_52599	63001	82000	10	0.125975	6.37e-06	-0.390771	SESE_063106	SESE_063106	72.97	XP_016683038.1	Endoribonuclease YBEY, chloroplastic isoform X4	Endoribonuclease YbeY	Ribosome biogenesis	GO:0008152-metabolic_process(L=1),GO:0009987-cellular_process(L=1),GO:0044699-single-organism_process(L=1),GO:0051179-localization(L=1),GO:0071840-cellular_component_organization_or_biogenesis(L=1),	GO:0003824-catalytic_activity(L=1),GO:0005215-transporter_activity(L=1),	-
SCAFFOLD_81965	11099001	11118000	10	0.117754	2.53e-06	-0.167678	SESE_025687	.	-	-	-			-	-	-
SCAFFOLD_81965	246831001	246850000	10	0.140278	2.11e-06	-0.291712	SESE_098747	SESE_098747	33.74	XP_024524596.1	BTB/POZ domain-containing protein	BTB/POZ domain-containing protein At5g48130	-	GO:0008152-metabolic_process(L=1),GO:0009987-cellular_process(L=1),GO:0023052-signaling(L=1),GO:0044699-single-organism_process(L=1),GO:0050896-response_to_stimulus(L=1),GO:0065007-biological_regulation(L=1),	-	GO:0004871-signal_transducer_activity(L=1),GO:0060089-molecular_transducer_activity(L=1),
SCAFFOLD_82755	40001	59000	10	0.248384	9.38e-06	-0.357143	.	.	-	-	-	-	-	-	-	-
SCAFFOLD_87677	85377001	85970001	11	0.179983	5.94e-06	-0.458393	.	.	-	-	-	-	-	-	-	-

## Sheet: Table S5
Table S5. Total numbers of candidate SNPs in giant sequoia identified by RDA and LFMM methods. The table contains candidate SNPs their genomic positions, genes and associated environmental variables.
RDA_analysis						LFMM_analysis
Chr	Position	SNPs	Gene	Environmental variable		Chr2	position	SNPs	Gene
chr1	712545	G	.	MAP		chr2	757405366	A	SEGI_30997*
chr1	200744756	T	.	CMD		chr2	757405451	T	SEGI_30997
chr1	241363536	A	SEGI_31880*	CMD		chr2	757405621	A	SEGI_30997
chr1	271353586	T	SEGI_24916*	MSP
chr1	271496065	C	.	CMD
chr1	317423509	T	.	MAP
chr1	317424017	A	.	MAP
chr1	317424206	A	.	MAP
chr1	317424274	T	.	MAP
chr1	317424750	C	.	MAP
chr1	317425164	G	.	MAP
chr1	317425342	C	.	MAP
chr1	317426042	A	.	MAP
chr1	317426094	A	.	MAP
chr1	326860611	A	.	MAP
chr1	326861598	C	SEGI_37058*	MAP
chr1	467436439	A	.	MAP
chr1	468165008	A	.	PAS
chr1	468165687	A	SEGI_18256	PAS
chr1	468166952	T	SEGI_18256*	PAS
chr1	468166964	C	SEGI_18256*	PAS
chr1	468167324	C	SEGI_18256*	PAS
chr1	468167911	A	SEGI_18256*	PAS
chr1	468168075	C	SEGI_18256*	PAS
chr1	468168080	G	SEGI_18256*	PAS
chr1	468168093	G	SEGI_18256*	PAS
chr1	468168304	T	SEGI_18256*	PAS
chr1	468168453	G	SEGI_18256*	PAS
chr1	468168792	A	SEGI_18256	PAS
chr1	468168918	C	SEGI_18256*	PAS
chr1	468169171	T	SEGI_18256*	PAS
chr1	468169190	G	SEGI_18256*	PAS
chr1	753120550	A	.	MAP
chr1	753121803	T	.	MAP
chr1	897272822	C	.	MSP
chr1	913363908	T	.	CMD
chr10	156138902	A	.	FFP
chr10	219884684	C	.	CMD
chr10	219884904	G	.	CMD
chr10	219926216	C	SEGI_18436	CMD
chr10	219936870	C	SEGI_18436	CMD
chr10	234509197	C	.	MAP
chr10	234515062	A	.	MAP
chr10	289758279	A	.	NFFD
chr10	289758309	C	.	NFFD
chr10	289758400	C	.	NFFD
chr10	289846657	T	SEGI_37506	NFFD
chr10	289846701	T	SEGI_37506	NFFD
chr10	289856846	T	SEGI_37506	NFFD
chr10	289902855	A	.	NFFD
chr10	289902923	G	.	NFFD
chr10	289978545	G	.	NFFD
chr10	290066202	A	.	NFFD
chr10	421280977	T	SEGI_20855*	CMD
chr10	421472470	T	.	CMD
chr10	505321383	T	.	NFFD
chr10	563730401	C	.	CMD
chr10	563730446	T	.	CMD
chr10	563730447	C	.	CMD
chr10	563730468	C	.	CMD
chr10	615047516	G	.	MAP
chr10	615070835	T	.	MAP
chr11	14627857	A	SEGI_24660	PAS
chr11	35469990	A	.	MSP
chr11	35470481	C	.	MSP
chr11	56405279	A	SEGI_24707*	MSP
chr11	102710941	A	.	MAP
chr11	169251199	T	.	PAS
chr11	229963897	A	.	PAS
chr11	381608932	A	.	NFFD
chr11	381609049	G	.	NFFD
chr11	381613242	A	.	NFFD
chr11	381614738	A	.	NFFD
chr11	381614857	A	.	NFFD
chr11	381615284	T	.	NFFD
chr11	381615444	A	.	NFFD
chr11	441882716	C	SEGI_29292*	MAP
chr2	196653720	T	.	NFFD
chr2	196654659	A	SEGI_30531*	NFFD
chr2	196654818	T	SEGI_30531*	NFFD
chr2	196655031	A	SEGI_30531*	NFFD
chr2	196655169	G	SEGI_30531*	NFFD
chr2	196657520	G	SEGI_30531	NFFD
chr2	382071911	G	.	CMD
chr2	522612125	A	.	CMD
chr2	649289929	T	SEGI_25599	MAP
chr2	649344665	A	.	MAP
chr2	649344666	A	.	MAP
chr2	649344974	A	.	MAP
chr2	649377890	T	.	MAP
chr2	824751010	C	SEGI_19226*	CMD
chr2	824752350	T	.	CMD
chr2	851009400	T	SEGI_27020	MSP
chr2	868322184	T	.	CMD
chr3	76077990	C	.	FFP
chr3	76118850	A	.	FFP
chr3	104090917	T	SEGI_10011	CMD
chr3	104111924	T	SEGI_10011*	CMD
chr3	209428845	T	.	NFFD
chr3	209453057	C	SEGI_11925	NFFD
chr3	311798717	G	.	CMD
chr3	311798769	G	.	CMD
chr3	311798910	T	.	CMD
chr3	401320046	A	.	FFP
chr3	401320281	G	.	FFP
chr3	401320524	G	SEGI_17061	FFP
chr3	401320580	C	SEGI_17061	FFP
chr3	408234486	G	SEGI_13597*	CMD
chr3	408234532	T	SEGI_13597*	CMD
chr3	475665219	G	.	CMD
chr3	477073823	C	SEGI_29666	CMD
chr3	486218762	A	SEGI_00815*	MAP
chr3	563953393	G	SEGI_09451*	PAS
chr3	613380372	A	.	CMD
chr3	613380373	A	.	CMD
chr3	634359805	T	.	CMD
chr3	634359816	A	.	CMD
chr3	634359842	T	.	CMD
chr3	634359944	G	.	CMD
chr3	634359988	A	.	CMD
chr3	634360046	C	.	CMD
chr3	634360084	C	.	CMD
chr3	634360151	A	.	CMD
chr3	634360225	T	SEGI_22232*	CMD
chr3	634360328	A	SEGI_22232	CMD
chr3	634391269	C	SEGI_22232*	CMD
chr3	634391373	G	SEGI_22232	CMD
chr3	634391441	A	SEGI_22232*	CMD
chr3	634391489	A	SEGI_22232*	CMD
chr3	634391512	C	SEGI_22232	CMD
chr3	634391525	A	SEGI_22232	CMD
chr3	634391539	G	SEGI_22232	CMD
chr3	634391708	G	SEGI_22232	CMD
chr3	634391716	A	SEGI_22232*	CMD
chr3	634391835	C	SEGI_22232	CMD
chr3	634392461	T	SEGI_22232	CMD
chr3	634392688	T	SEGI_22232	CMD
chr3	673678851	A	.	MSP
chr3	673679211	G	SEGI_11478	MSP
chr3	716191933	C	SEGI_02591	MAP
chr3	716200145	A	SEGI_02591	MAP
chr3	716202004	A	SEGI_02591*	MAP
chr3	716202168	A	SEGI_02591	MAP
chr3	716202275	T	SEGI_02591	MAP
chr3	716202414	A	SEGI_02591*	MAP
chr3	716202488	T	SEGI_02591	MAP
chr3	716202924	A	SEGI_02591	MAP
chr3	716202950	C	SEGI_02591	MAP
chr3	716203204	G	SEGI_02591	MAP
chr3	716208643	T	SEGI_02591	MAP
chr3	716229044	T	SEGI_02591	MAP
chr3	716229240	C	SEGI_02591*	MAP
chr3	716229315	G	SEGI_02591	MAP
chr3	716242632	G	SEGI_02591	MAP
chr3	716297091	C	.	MAP
chr3	716297147	C	.	MAP
chr3	716297159	G	.	MAP
chr3	716297188	C	.	MAP
chr3	716297296	A	.	MAP
chr3	716297464	G	.	MAP
chr3	716297581	C	.	MAP
chr3	741946237	A	SEGI_09259	CMD
chr4	58954541	C	SEGI_33223	MSP
chr4	58954918	C	SEGI_33223	MSP
chr4	59067527	C	.	MSP
chr4	59067601	A	.	MSP
chr4	59067940	A	SEGI_01182	MSP
chr4	59148678	G	SEGI_24670	MSP
chr4	60516184	T	.	MAP
chr4	329452342	G	SEGI_09261	MSP
chr4	330207271	G	.	MSP
chr4	330290407	G	SEGI_34105	MSP
chr4	330290967	T	SEGI_34105*	MSP
chr4	331261372	A	SEGI_14834	MSP
chr4	466340619	C	.	MAP
chr4	473283714	C	.	MAP
chr4	473318178	G	SEGI_21478	MAP
chr4	473318727	G	SEGI_21478	MAP
chr4	473330962	C	SEGI_21478	MAP
chr4	473331350	T	SEGI_21478	MAP
chr4	473331356	T	SEGI_21478	MAP
chr4	473332554	T	SEGI_21478	MAP
chr4	473351552	A	SEGI_22391	MAP
chr4	473352677	T	SEGI_22391	MAP
chr4	473352879	C	SEGI_22391*	MAP
chr4	473353088	T	SEGI_22391*	MAP
chr4	473353103	A	SEGI_22391*	MAP
chr4	473371633	T	.	MAP
chr4	473371657	C	.	MAP
chr4	473383217	A	.	MAP
chr4	473383345	A	.	MAP
chr4	533677120	T	.	CMD
chr4	533677121	G	.	CMD
chr4	533677259	T	.	CMD
chr4	533677397	G	.	MSP
chr4	534256555	A	.	MAP
chr4	534256587	C	.	MAP
chr4	607659912	C	.	MSP
chr4	674247474	A	.	MAP
chr5	63242235	G	SEGI_01914	PAS
chr5	72157606	C	SEGI_33526*	MSP
chr5	180511743	G	.	MSP
chr5	192320958	G	.	MAP
chr5	192321029	G	.	MAP
chr5	321036221	A	.	CMD
chr5	355563093	CTTTTT	SEGI_01196	MAP
chr5	432935874	A	.	MAP
chr5	521655834	G	.	NFFD
chr5	521831689	G	.	NFFD
chr5	521831692	T	.	NFFD
chr5	521831705	C	.	NFFD
chr5	521831887	G	.	NFFD
chr5	522015597	A	.	NFFD
chr5	522015810	T	.	NFFD
chr5	522017501	T	.	NFFD
chr5	522017642	G	.	NFFD
chr5	522022398	A	.	NFFD
chr5	522022475	T	.	NFFD
chr5	522022790	A	.	NFFD
chr5	535903704	C	.	MAP
chr5	548490735	G	SEGI_09865	MAP
chr5	548501421	G	SEGI_04086	MAP
chr5	548502851	T	.	MAP
chr5	548654998	A	.	MAP
chr5	585793198	G	.	NFFD
chr5	644304325	A	SEGI_06629*	CMD
chr5	649919749	C	SEGI_04694*	MSP
chr5	649919757	C	SEGI_04694*	MSP
chr6	379710569	C	.	CMD
chr6	436359268	G	.	CMD
chr6	436359344	C	.	CMD
chr6	436359509	G	.	CMD
chr6	436359704	A	.	CMD
chr6	436362946	A	.	CMD
chr6	436364060	A	.	CMD
chr6	439468798	A	.	MSP
chr6	439468961	G	.	MSP
chr6	439469136	C	.	MSP
chr6	652659266	A	.	MSP
chr6	278386643	G	.	NFFD
chr6	278397017	T	.	NFFD
chr6	278436674	G	.	NFFD
chr6	186369496	A	.	PAS
chr6	186456671	G	SEGI_02202	PAS
chr6	531675800	G	.	PAS
chr6	531675807	A	.	PAS
chr6	531675810	C	.	PAS
chr7	90105354	C	.	PAS
chr7	260167949	G	SEGI_08479*	NFFD
chr7	330789446	G	.	MSP
chr7	330789628	A	.	MSP
chr7	584298917	T	.	MSP
chr7	584298987	T	.	MSP
chr7	584299250	C	.	MSP
chr7	584299585	T	SEGI_21199	MSP
chr7	584299586	G	SEGI_21199	MSP
chr7	584299588	C	SEGI_21199	MSP
chr7	584299617	A	SEGI_21199	MSP
chr7	584299666	G	SEGI_21199	MSP
chr7	584302572	A	SEGI_21199	MSP
chr7	584302628	C	SEGI_21199	MSP
chr7	584302879	T	SEGI_21199*	MSP
chr7	584303020	G	SEGI_21199	MSP
chr7	584303502	G	SEGI_21199*	MSP
chr7	584303647	T	SEGI_21199	MSP
chr7	584303941	T	SEGI_21199*	MSP
chr7	584304030	C	SEGI_21199	MSP
chr7	584304370	T	SEGI_21199	MSP
chr7	584304384	G	SEGI_21199	MSP
chr7	584305072	C	SEGI_21199*	MSP
chr7	584305222	T	SEGI_21199	MSP
chr7	584305526	T	.	MSP
chr7	584305556	T	.	MSP
chr7	584327307	A	.	MSP
chr7	584327406	A	.	MSP
chr7	584327613	C	.	MSP
chr7	584346276	A	.	MSP
chr7	584346379	C	.	MSP
chr7	584346380	C	.	MSP
chr7	584346571	C	.	MSP
chr8	87787786	A	.	NFFD
chr8	114198871	A	.	FFP
chr8	114199280	G	SEGI_31232*	FFP
chr8	114201101	C	SEGI_31232*	FFP
chr8	189526385	A	.	CMD
chr8	434242494	A	.	CMD
chr9	327515453	G	.	MSP
chr9	463503914	G	SEGI_34257	MAP
chr9	485220987	T	SEGI_09541*	CMD
chr9	574713697	G	SEGI_29217	MAP
chr9	574722872	C	SEGI_29217	MAP
chr9	574796597	C	SEGI_21288	MAP
* represent SNPs in both gene and CDS

## Sheet: Table S6
Table S6. Total numbers of candidate SNPs in coast redwood identified by RDA and LFMM methods. The table contains candidate SNPs their genomic positions, genes and associated environmental variables.
RDA_analysis						LFMM_analysis
Scaffold	Position	SNPs	Gene	Environmental variable		Scaffolds	Position	SNPs	Gene
Scaffold_100309	43099472	A	.	AHM		Scaffold_126231	22282	C	SESE_089222
Scaffold_100309	80166154	A	.	AHM		Scaffold_167773	207125440	G	SESE_020758
Scaffold_100309	106061598	G	.	AHM		Scaffold_181730	102627731	G	.
Scaffold_100309	113534621	T	SESE_026109	CMD		Scaffold_181730	102627841	C	.
Scaffold_100309	113534887	A	.	CMD		Scaffold_181730	102628357	T	SESE_121765
Scaffold_100309	71350234	T	.	MAP		Scaffold_181730	102628397	C	SESE_121765
Scaffold_100309	79638768	G	SESE_012239	MAP		Scaffold_181730	102629046	G	SESE_121765
Scaffold_100309	79638779	T	SESE_012239	MAP		Scaffold_181730	102629051	C	SESE_121765
Scaffold_100309	174612477	T	SESE_064138	MAP		Scaffold_181730	102629057	A	SESE_121765
Scaffold_100309	113534611	A	SESE_026109	MAT		Scaffold_181730	102629207	C	SESE_121765*
Scaffold_100309	162663214	C	SESE_032509	MAT		Scaffold_181730	102629305	G	SESE_121765
Scaffold_100309	168453059	C	.	MAT		Scaffold_181730	102629335	G	SESE_121765
Scaffold_101596	105402	C	SESE_107124*	MAT		Scaffold_181730	102629353	A	SESE_121765*
Scaffold_106958	27300	A	.	CMD		Scaffold_181730	102629427	T	SESE_121765*
Scaffold_108588	107810	T	.	MAP		Scaffold_181730	102629538	A	SESE_121765
Scaffold_115556	22224	T	.	MAT		Scaffold_181730	102629637	A	SESE_121765*
Scaffold_11564	112100	A	.	MAT		Scaffold_181730	102629693	A	SESE_121765
Scaffold_11644	17095714	A	.	MAT		Scaffold_181730	102629854	C	SESE_121765*
Scaffold_11805	28000	T	SESE_120078	CMD		Scaffold_181730	102630112	C	SESE_121765
Scaffold_118054	1699	T	.	AHM		Scaffold_181730	102630493	C	SESE_121765
Scaffold_118054	1782	A	.	AHM		Scaffold_181730	102630525	T	SESE_121765
Scaffold_122649	43280	T	.	AHM		Scaffold_181730	102630526	C	SESE_121765
Scaffold_122649	43296	G	.	AHM		Scaffold_181730	102630682	T	SESE_121765*
Scaffold_123020	33934	T	.	MAT		Scaffold_181730	102630712	G	SESE_121765*
Scaffold_123671	27520980	C	.	AHM		Scaffold_181730	102630769	C	SESE_121765*
Scaffold_123671	27521100	A	.	AHM		Scaffold_181730	102631273	G	SESE_121765*
Scaffold_123671	27521643	T	.	AHM		Scaffold_181730	102631349	G	SESE_121765*
Scaffold_123671	117511157	C	.	CMD		Scaffold_181730	102631511	C	SESE_121765
Scaffold_123671	117511261	T	.	CMD		Scaffold_181730	102633202	T	SESE_121765*
Scaffold_123671	106299155	C	SESE_007135	MAT		Scaffold_181730	102633221	A	SESE_121765*
Scaffold_123671	106409841	T	.	MAT		Scaffold_181730	102633290	T	SESE_121765
Scaffold_123671	106409870	G	.	MAT		Scaffold_181730	102633311	A	SESE_121765
Scaffold_123671	106410168	A	.	MAT		Scaffold_181730	102633466	T	SESE_121765*
Scaffold_123671	106410777	A	.	MAT		Scaffold_181730	102633897	C	.
Scaffold_123671	106412135	T	.	MAT		Scaffold_181730	102794048	C	.
Scaffold_123671	106412246	T	.	MAT		Scaffold_181730	102794221	A	SESE_009736*
Scaffold_123671	106412548	T	.	MAT		Scaffold_181730	102794470	C	SESE_009736*
Scaffold_123671	164411026	C	.	MAT		Scaffold_181730	102794608	G	SESE_009736*
Scaffold_125242	126827	A	SESE_107044*	AHM		Scaffold_181730	102794665	G	SESE_009736*
Scaffold_125626	66965	G	.	AHM		Scaffold_181730	102794923	G	SESE_009736*
Scaffold_125626	67053	C	.	CMD		Scaffold_181730	102795556	G	SESE_009736
Scaffold_126231	22282	C	SESE_089222	CMD		Scaffold_181730	102795660	T	SESE_009736
Scaffold_133194	344861	C	SESE_001258	AHM		Scaffold_181730	102795661	G	SESE_009736
Scaffold_14017	34488	A	SESE_072616	MAP		Scaffold_181730	102795703	A	SESE_009736
Scaffold_142412	585767	C	SESE_130738*	AHM		Scaffold_181730	102795708	T	SESE_009736
Scaffold_142412	18776703	T	SESE_014569	CMD		Scaffold_181730	104903234	T	SESE_109856
Scaffold_142412	18777220	G	SESE_014572*	CMD		Scaffold_181730	104903243	C	SESE_109856
Scaffold_142412	44257427	G	.	CMD		Scaffold_181730	118019231	G	SESE_067476
Scaffold_142412	3481210	A	.	MAT		Scaffold_181730	118019265	C	SESE_067476
Scaffold_142412	7297690	C	SESE_109345	MAT		Scaffold_181730	118019293	A	SESE_067476
Scaffold_142412	7297889	T	SESE_109345	MAT		Scaffold_181730	118019951	G	SESE_067476
Scaffold_142412	18776797	C	SESE_014569*	MAT		Scaffold_181730	118020047	A	SESE_067476
Scaffold_142490	12647764	A	.	MAT		Scaffold_181730	118020067	C	SESE_067476
Scaffold_142490	23605758	A	.	CMD		Scaffold_181730	118020128	C	SESE_067476
Scaffold_142490	26976988	T	SESE_085808*	MAT		Scaffold_181730	118020155	C	SESE_067476
Scaffold_142490	45452171	A	SESE_019171	MAT		Scaffold_181730	118020287	A	SESE_067476*
Scaffold_142490	45452434	G	SESE_019171	AHM		Scaffold_181730	118020401	T	SESE_067476*
Scaffold_142490	157531349	T	.	AHM		Scaffold_181730	118020429	A	SESE_067476*
Scaffold_142490	189894969	T	.	MAT		Scaffold_181730	118020497	C	SESE_067476*
Scaffold_142490	224170208	T	.	MAT		Scaffold_181730	118020547	A	SESE_067476*
Scaffold_142490	235386824	C	SESE_083869*	CMD		Scaffold_181730	118020815	C	SESE_067476*
Scaffold_142490	235386906	A	.	CMD		Scaffold_181730	118020929	A	SESE_067476*
Scaffold_142490	238882261	C	SESE_103346	MAT		Scaffold_181730	118021124	T	SESE_067476*
Scaffold_142490	238889845	G	SESE_103346	AHM		Scaffold_181730	118021480	A	SESE_067476*
Scaffold_142490	238890154	G	SESE_103346	AHM		Scaffold_181730	118021489	A	SESE_067476*
Scaffold_142490	238909673	A	SESE_103346	MAT		Scaffold_181730	118021592	T	SESE_067476*
Scaffold_142490	238909702	C	SESE_103346	MAT		Scaffold_181730	118021617	A	SESE_067476*
Scaffold_142490	238921795	T	SESE_103346	AHM		Scaffold_181730	118021651	A	SESE_067476*
Scaffold_142490	299599819	T	SESE_085719	MAP		Scaffold_203021	548254633	C	SESE_048862*
Scaffold_142490	299599866	T	SESE_085719	AHM		Scaffold_330512	196143030	A	.
Scaffold_142490	299600889	G	SESE_085719	MAT		Scaffold_68679	22263	C	SESE_085834
Scaffold_142490	299600902	T	SESE_085719	MAT
Scaffold_142490	319623776	G	.	CMD
Scaffold_142490	332752223	T	SESE_012202	MAT
Scaffold_142490	340066136	A	SESE_087166	MAP
Scaffold_142490	370263637	G	SESE_079479*	MAP
Scaffold_142490	370264163	T	SESE_079479	MAP
Scaffold_142490	393567915	A	SESE_098832*	MAT
Scaffold_142490	455392342	A	.	MAT
Scaffold_142490	457867291	A	SESE_025814	MAP
Scaffold_142490	494809822	C	SESE_001890	MAP
Scaffold_142490	508282499	G	SESE_079019*	CMD
Scaffold_142490	521076046	G	.	MAT
Scaffold_142490	552506549	T	SESE_120402	MAP
Scaffold_142490	552506641	T	SESE_120402	AHM
Scaffold_142490	587284320	C	.	MAT
Scaffold_142490	587284646	T	.	MAT
Scaffold_142490	587284652	G	.	MAT
Scaffold_142490	628187726	T	.	MAT
Scaffold_142640	37126560	A	SESE_085061	AHM
Scaffold_142640	37126694	G	SESE_085061*	AHM
Scaffold_142640	37126697	A	SESE_085061*	AHM
Scaffold_142640	93465099	T	SESE_004651	AHM
Scaffold_142640	107465295	A	SESE_096324	AHM
Scaffold_142640	113283388	A	SESE_102440*	AHM
Scaffold_142640	120501307	A	.	AHM
Scaffold_142640	113287106	C	SESE_102440*	CMD
Scaffold_142640	113287337	G	SESE_102440*	CMD
Scaffold_142640	113287459	A	SESE_102440*	CMD
Scaffold_142640	37126731	T	.	MAP
Scaffold_142640	37126738	C	.	MAP
Scaffold_142640	37126752	G	.	MAP
Scaffold_142640	37126768	C	.	MAP
Scaffold_142640	37126836	A	.	MAP
Scaffold_142640	37126853	A	.	MAP
Scaffold_142640	93464147	T	SESE_004651	MAT
Scaffold_142640	113287241	T	SESE_102440*	MAT
Scaffold_143733	5959	C	.	MAP
Scaffold_144279	53245646	T	SESE_120175	AHM
Scaffold_144279	102215027	C	SESE_089652	MAT
Scaffold_144279	102215061	A	SESE_089652	MAT
Scaffold_144279	102215191	A	SESE_089652*	MAT
Scaffold_148645	45322	C	SESE_029440	AHM
Scaffold_150004	93098	C	.	MAP
Scaffold_15069	46478283	G	SESE_147247*	CMD
Scaffold_15069	46478228	C	SESE_147247*	MAT
Scaffold_15069	46478248	A	SESE_147247*	MAT
Scaffold_15069	46478252	G	SESE_147247*	MAT
Scaffold_15069	47103247	T	.	MAT
Scaffold_152400	5056453	T	SESE_062974*	MAP
Scaffold_152400	33431063	C	.	MAT
Scaffold_152400	43387351	G	SESE_004901*	AHM
Scaffold_152400	43961477	G	SESE_026200	MAT
Scaffold_152400	43961505	C	SESE_026200	CMD
Scaffold_152400	51318429	A	.	MAT
Scaffold_152400	51318968	T	.	MAP
Scaffold_152400	75265079	T	SESE_002172	AHM
Scaffold_152400	80460350	G	SESE_024698	MAT
Scaffold_152400	86825224	G	SESE_118250	MAP
Scaffold_152400	179917177	G	SESE_027502*	MAP
Scaffold_152400	180372213	T	SESE_120015	AHM
Scaffold_152400	208897037	A	.	MAT
Scaffold_152400	224828852	C	.	AHM
Scaffold_152400	245093038	A	SESE_093798	CMD
Scaffold_152400	246865325	T	.	MAP
Scaffold_152400	246868327	A	.	MAP
Scaffold_152400	263354607	A	SESE_092476	MAT
Scaffold_152400	270600329	G	SESE_105718	MAP
Scaffold_152400	270601562	C	SESE_105718*	MAT
Scaffold_152400	360133333	G	SESE_015793	AHM
Scaffold_152400	360134443	T	SESE_015793	MAP
Scaffold_152400	473042482	A	.	CMD
Scaffold_152400	497008540	T	.	MAT
Scaffold_152400	511952188	G	.	AHM
Scaffold_152400	511952201	G	.	AHM
Scaffold_152400	511952489	C	.	CMD
Scaffold_152400	527637636	A	.	MAP
Scaffold_152400	527637709	A	.	MAP
Scaffold_152400	527637720	A	.	MAP
Scaffold_152400	527637734	A	.	MAP
Scaffold_152400	527637789	T	.	MAP
Scaffold_152400	527637848	T	.	MAP
Scaffold_152400	533126987	A	.	CMD
Scaffold_152400	732123018	T	.	MAT
Scaffold_152400	738055584	G	SESE_102258*	CMD
Scaffold_152400	738055676	A	SESE_102258*	CMD
Scaffold_162829	42749	T	SESE_106924*	MAT
Scaffold_164616	152973	G	SESE_115738	MAT
Scaffold_164616	152974	C	SESE_115738	MAT
Scaffold_16502	5234288	T	SESE_115959	MAP
Scaffold_16502	5234291	G	SESE_115959	MAP
Scaffold_16502	41541590	A	.	MAP
Scaffold_16502	73386209	A	.	MAP
Scaffold_16502	104237737	G	.	MAP
Scaffold_16502	104237795	G	.	MAP
Scaffold_16502	91341275	C	SESE_005926*	MAT
Scaffold_16502	104238457	C	.	MAT
Scaffold_167773	80234529	G	SESE_083263	AHM
Scaffold_167773	80234549	G	SESE_083263	AHM
Scaffold_167773	80234552	A	SESE_083263	AHM
Scaffold_167773	80234566	A	SESE_083263	AHM
Scaffold_167773	80234572	G	SESE_083263	AHM
Scaffold_167773	218347142	C	SESE_100967*	AHM
Scaffold_167773	258146638	G	SESE_133812*	AHM
Scaffold_167773	258146705	A	SESE_133812*	AHM
Scaffold_167773	258146778	T	SESE_133812*	AHM
Scaffold_167773	258146846	G	SESE_133812*	AHM
Scaffold_167773	207125440	G	SESE_020758*	CMD
Scaffold_167773	292046525	A	SESE_102523*	CMD
Scaffold_167773	300311280	G	SESE_144377*	CMD
Scaffold_167773	301292004	G	.	CMD
Scaffold_167773	80234408	G	SESE_083263	MAP
Scaffold_167773	278881215	T	.	MAP
Scaffold_167773	278963948	A	SESE_004548	MAP
Scaffold_167773	278970643	G	.	MAP
Scaffold_167773	300310837	T	.	MAP
Scaffold_167773	363237134	A	SESE_032139	MAP
Scaffold_167773	364035330	C	.	MAP
Scaffold_167773	124948280	G	SESE_021145*	MAT
Scaffold_167773	154576572	G	.	MAT
Scaffold_167773	154576580	A	.	MAT
Scaffold_167773	154576586	G	.	MAT
Scaffold_167773	161576223	A	SESE_018356*	MAT
Scaffold_167773	363237310	G	SESE_032139*	MAT
Scaffold_167773	366145521	T	SESE_075849*	MAT
Scaffold_167773	374190348	A	.	MAT
Scaffold_17168	89602	A	.	MAP
Scaffold_172323	106771	A	SESE_082391*	AHM
Scaffold_172323	106937	C	SESE_082391*	AHM
Scaffold_172323	106946	G	SESE_082391*	AHM
Scaffold_172323	107174	A	SESE_082391*	AHM
Scaffold_172323	106075	C	SESE_082391*	MAT
Scaffold_172323	106835	G	SESE_082391*	MAT
Scaffold_1728	265284	G	.	MAP
Scaffold_177458	36282744	A	SESE_091326*	MAT
Scaffold_177458	59787586	A	.	MAP
Scaffold_177458	59787742	T	.	MAP
Scaffold_177458	59788166	T	.	MAP
Scaffold_177458	59788391	C	.	MAP
Scaffold_177458	59788468	A	.	MAP
Scaffold_177458	59788510	A	.	MAP
Scaffold_177458	63954538	T	SESE_107702*	MAT
Scaffold_177458	63954540	A	SESE_107702*	MAT
Scaffold_177458	63954807	T	.	CMD
Scaffold_177458	63954815	A	.	CMD
Scaffold_177458	63954825	G	.	CMD
Scaffold_177458	63954837	T	.	CMD
Scaffold_177458	106208753	T	.	CMD
Scaffold_177458	140918161	C	.	AHM
Scaffold_177458	140918173	A	.	AHM
Scaffold_177458	140918183	A	.	AHM
Scaffold_177458	140918219	T	.	AHM
Scaffold_177458	232124102	A	.	MAP
Scaffold_177458	232124133	T	.	MAP
Scaffold_177458	298419024	T	.	AHM
Scaffold_177458	371895602	G	.	AHM
Scaffold_178709	5089	T	.	AHM
Scaffold_178709	5025	T	.	MAP
Scaffold_17892	281927	C	.	CMD
Scaffold_181730	136705205	A	.	AHM
Scaffold_181730	47331577	C	SESE_005157	CMD
Scaffold_181730	94658784	T	.	CMD
Scaffold_181730	94658869	A	.	CMD
Scaffold_181730	94658885	A	.	CMD
Scaffold_181730	94658895	G	.	CMD
Scaffold_181730	94658898	C	.	CMD
Scaffold_181730	102627869	T	.	CMD
Scaffold_181730	102629668	C	SESE_121765*	CMD
Scaffold_181730	102629768	A	SESE_121765*	CMD
Scaffold_181730	102629934	T	SESE_121765	CMD
Scaffold_181730	102633466	T	SESE_121765*	CMD
Scaffold_181730	102793987	G	.	CMD
Scaffold_181730	102793989	A	.	CMD
Scaffold_181730	102794048	C	.	CMD
Scaffold_181730	102794803	A	SESE_009736*	CMD
Scaffold_181730	102794885	G	SESE_009736*	CMD
Scaffold_181730	102795197	A	SESE_009736*	CMD
Scaffold_181730	102795332	C	SESE_009736*	CMD
Scaffold_181730	102795489	A	SESE_009736*	CMD
Scaffold_181730	103034273	A	SESE_029346	CMD
Scaffold_181730	103034377	T	SESE_029346*	CMD
Scaffold_181730	103034392	C	SESE_029346*	CMD
Scaffold_181730	103034431	A	SESE_029346*	CMD
Scaffold_181730	117020871	G	.	CMD
Scaffold_181730	117020878	G	.	CMD
Scaffold_181730	118020917	A	SESE_067476*	CMD
Scaffold_181730	118021677	C	.	CMD
Scaffold_181730	118021809	G	.	CMD
Scaffold_181730	193891767	A	SESE_027078*	CMD
Scaffold_181730	212907754	C	.	CMD
Scaffold_181730	25038566	C	.	MAP
Scaffold_181730	25038601	T	.	MAP
Scaffold_181730	102627731	G	.	MAP
Scaffold_181730	102628357	T	SESE_121765	MAP
Scaffold_181730	102628876	C	SESE_121765*	MAP
Scaffold_181730	118019259	T	SESE_067476	MAP
Scaffold_181730	118020287	A	SESE_067476*	MAP
Scaffold_181730	173532280	T	SESE_001152	MAP
Scaffold_181730	203564448	C	SESE_013143	MAP
Scaffold_181730	212906779	A	.	MAP
Scaffold_181730	13200943	T	.	MAT
Scaffold_181730	13200955	G	.	MAT
Scaffold_181730	260092877	A	SESE_007109*	MAT
Scaffold_181730	260155607	T	SESE_007109	MAT
Scaffold_18580	9475	A	.	MAT
Scaffold_18580	9515	C	.	MAT
Scaffold_186248	99438	A	.	CMD
Scaffold_187815	18788	C	.	CMD
Scaffold_195192	46372300	G	.	CMD
Scaffold_195192	50722260	A	SESE_111734	AHM
Scaffold_195192	64535013	A	.	MAT
Scaffold_195192	64535074	G	.	MAT
Scaffold_195192	64535248	C	.	MAT
Scaffold_195192	64535266	C	.	MAT
Scaffold_195192	64535319	G	.	MAP
Scaffold_195192	77024861	C	.	AHM
Scaffold_195192	77025249	A	.	MAP
Scaffold_195192	93070222	T	.	MAP
Scaffold_195192	182439119	A	.	AHM
Scaffold_195192	206898021	G	SESE_032005	AHM
Scaffold_195192	206898968	G	SESE_068456	AHM
Scaffold_195192	235075832	A	SESE_093142	CMD
Scaffold_195192	249167706	G	.	AHM
Scaffold_195192	249167721	T	.	CMD
Scaffold_195192	261699360	C	.	AHM
Scaffold_195192	262547738	C	SESE_020778*	AHM
Scaffold_195192	328945633	A	SESE_007525	AHM
Scaffold_195192	334181242	A	SESE_058034	CMD
Scaffold_195192	342940116	T	SESE_031985*	MAP
Scaffold_195192	388022951	C	.	AHM
Scaffold_195192	398272081	C	SESE_079577*	MAP
Scaffold_195192	449253371	C	SESE_107814	AHM
Scaffold_195192	457869137	C	SESE_060620*	MAP
Scaffold_195192	457869140	A	SESE_060620*	MAP
Scaffold_195192	482228186	C	.	AHM
Scaffold_195192	482228196	T	.	AHM
Scaffold_195192	532033451	G	SESE_011847	MAP
Scaffold_195192	540739155	C	.	CMD
Scaffold_195192	562428429	G	.	AHM
Scaffold_19765	41729	A	.	MAT
Scaffold_198123	33779666	A	SESE_010706	CMD
Scaffold_198123	18747158	C	SESE_000417	MAT
Scaffold_198123	24621368	A	.	MAT
Scaffold_198805	155705	A	SESE_081498*	MAT
Scaffold_198858	28026	T	.	MAP
Scaffold_203021	22150293	C	.	CMD
Scaffold_203021	35971898	G	.	MAT
Scaffold_203021	35972254	G	SESE_027368	MAP
Scaffold_203021	35972395	A	SESE_027368	MAP
Scaffold_203021	38669114	A	SESE_022179*	AHM
Scaffold_203021	38669528	A	SESE_022179*	AHM
Scaffold_203021	38669797	C	.	AHM
Scaffold_203021	38669960	A	.	AHM
Scaffold_203021	50508207	G	SESE_026779*	AHM
Scaffold_203021	64972250	T	.	MAT
Scaffold_203021	82676966	T	.	CMD
Scaffold_203021	115769236	G	SESE_001413	MAT
Scaffold_203021	115769237	T	SESE_001413	MAT
Scaffold_203021	115769255	C	SESE_001413	MAT
Scaffold_203021	115769360	C	SESE_001413	MAT
Scaffold_203021	115769367	A	SESE_001413	MAT
Scaffold_203021	115769434	T	SESE_001413	MAT
Scaffold_203021	125053934	A	SESE_032253	MAT
Scaffold_203021	201421276	A	.	MAP
Scaffold_203021	230880129	C	.	CMD
Scaffold_203021	230880167	A	.	CMD
Scaffold_203021	230880414	C	.	MAP
Scaffold_203021	230880593	G	.	MAP
Scaffold_203021	230880612	T	.	CMD
Scaffold_203021	232785391	T	SESE_052680*	AHM
Scaffold_203021	232785394	A	SESE_052680*	AHM
Scaffold_203021	232785901	G	SESE_052680*	AHM
Scaffold_203021	257318698	A	.	MAT
Scaffold_203021	329711498	G	.	MAP
Scaffold_203021	332478780	C	SESE_041504*	AHM
Scaffold_203021	336425445	T	.	MAT
Scaffold_203021	347132808	T	.	MAP
Scaffold_203021	372679543	C	SESE_014702*	MAP
Scaffold_203021	372679655	C	SESE_014702	MAP
Scaffold_203021	372680196	T	SESE_014702*	MAP
Scaffold_203021	372680512	T	SESE_014702	MAP
Scaffold_203021	372680513	C	SESE_014702	MAP
Scaffold_203021	372740483	G	SESE_014702	MAP
Scaffold_203021	372740490	A	SESE_014702	MAP
Scaffold_203021	375695208	A	SESE_027642*	CMD
Scaffold_203021	375695307	T	SESE_027642*	AHM
Scaffold_203021	379257943	A	SESE_003150*	MAT
Scaffold_203021	407302748	C	.	CMD
Scaffold_203021	424800717	C	.	AHM
Scaffold_203021	548254633	C	SESE_048862*	CMD
Scaffold_203021	569562776	A	SESE_030384*	AHM
Scaffold_203021	571466528	A	.	CMD
Scaffold_203021	571466888	T	.	AHM
Scaffold_203021	571466908	A	.	MAT
Scaffold_203021	628219093	G	SESE_034118	MAT
Scaffold_203021	661377450	T	.	CMD
Scaffold_203021	706636312	T	SESE_022889*	CMD
Scaffold_203021	723605565	A	SESE_031915*	MAT
Scaffold_203021	803537908	T	.	AHM
Scaffold_203021	807397389	T	.	MAT
Scaffold_203021	828132665	A	SESE_003833	AHM
Scaffold_203021	837615287	G	.	AHM
Scaffold_203021	838466130	A	.	MAT
Scaffold_203021	846717044	A	.	MAP
Scaffold_203021	847409561	T	SESE_027373	AHM
Scaffold_203021	852980859	C	.	MAT
Scaffold_203021	853157369	T	SESE_028352*	MAT
Scaffold_203021	875236201	G	SESE_032417	MAT
Scaffold_203021	992804520	G	SESE_027993	AHM
Scaffold_203021	993333060	C	.	AHM
Scaffold_203021	1039745803	T	.	MAP
Scaffold_203021	1041840896	G	SESE_039525*	AHM
Scaffold_203021	1041842087	T	SESE_039525	AHM
Scaffold_203021	1041842554	A	.	AHM
Scaffold_203021	1050216375	A	.	MAP
Scaffold_203021	1085124953	T	SESE_025816*	MAP
Scaffold_203021	1085124958	G	SESE_025816*	MAP
Scaffold_203021	1085125359	G	SESE_025816*	MAP
Scaffold_203021	1093608993	T	.	MAT
Scaffold_203021	1093609000	G	.	MAT
Scaffold_203021	1152079789	G	.	AHM
Scaffold_203021	1152080123	G	.	AHM
Scaffold_203021	1189665241	C	SESE_007455	AHM
Scaffold_203021	1222446127	G	SESE_028622	CMD
Scaffold_203021	1240266173	A	SESE_037729	MAP
Scaffold_203021	1246709786	A	SESE_039889	MAT
Scaffold_203021	1246709897	C	SESE_039889	MAT
Scaffold_203021	1248942656	C	SESE_017373	MAT
Scaffold_203021	1248942872	A	SESE_017373	MAP
Scaffold_203021	1248942983	G	SESE_017373	MAP
Scaffold_203021	1248943284	C	SESE_017373	MAP
Scaffold_203021	1324034431	A	.	AHM
Scaffold_207106	6168	G	.	AHM
Scaffold_207287	88411	A	.	AHM
Scaffold_207287	88418	C	.	AHM
Scaffold_207287	88396	A	.	MAP
Scaffold_213210	79251	G	.	AHM
Scaffold_213210	81102	T	.	AHM
Scaffold_215653	13692573	T	.	MAP
Scaffold_215653	13693348	T	SESE_004990	MAT
Scaffold_216796	151481	T	.	AHM
Scaffold_223616	19028475	A	SESE_066024*	AHM
Scaffold_223616	19028490	C	SESE_066024*	MAP
Scaffold_223616	19028505	C	SESE_066024*	MAP
Scaffold_223616	40513671	A	SESE_057325*	MAT
Scaffold_224175	20138	G	.	CMD
Scaffold_237584	297658	C	.	MAT
Scaffold_23776	61506	A	SESE_118440	AHM
Scaffold_23776	61394	T	SESE_118440*	MAT
Scaffold_23946	33554	C	.	AHM
Scaffold_244917	89792	T	SESE_026833*	AHM
Scaffold_25048	96300	G	.	AHM
Scaffold_25048	96569	G	.	MAT
Scaffold_25048	96579	T	.	MAT
Scaffold_251294	33328138	G	SESE_017704	AHM
Scaffold_251294	33328193	C	SESE_017704	AHM
Scaffold_251294	46218924	T	SESE_113383	AHM
Scaffold_251294	68574781	T	SESE_029555	MAT
Scaffold_251294	68575542	C	.	CMD
Scaffold_251294	68575552	G	.	CMD
Scaffold_251294	134476799	G	.	CMD
Scaffold_251294	139955381	T	.	MAP
Scaffold_251294	146830986	T	.	AHM
Scaffold_251294	146830987	T	.	AHM
Scaffold_251294	146831182	C	.	CMD
Scaffold_251294	176810714	A	.	MAT
Scaffold_251294	176810718	G	.	MAT
Scaffold_255721	71871	T	.	AHM
Scaffold_255721	70380	C	.	MAP
Scaffold_255721	71249	A	.	MAP
Scaffold_256783	92795	G	SESE_105796*	CMD
Scaffold_256783	93034	T	SESE_105796*	CMD
Scaffold_256783	93119	G	SESE_105796*	CMD
Scaffold_25918	75836	G	SESE_001538	MAP
Scaffold_26129	87807709	C	SESE_001771	MAP
Scaffold_262753	298153	C	SESE_019897	MAT
Scaffold_271552	105909	A	.	AHM
Scaffold_271552	105937	T	.	AHM
Scaffold_273603	37496	A	.	MAP
Scaffold_274470	14072627	T	SESE_029568*	MAT
Scaffold_274470	14072628	A	SESE_029568*	MAT
Scaffold_274470	26750465	A	SESE_113422	MAT
Scaffold_274470	52205559	A	SESE_000137	CMD
Scaffold_274470	52205865	C	.	CMD
Scaffold_274470	52205909	G	.	CMD
Scaffold_274470	79823699	T	.	CMD
Scaffold_274470	79835169	C	.	MAP
Scaffold_274470	81975160	G	.	MAT
Scaffold_274470	95407999	C	.	MAT
Scaffold_274470	145667593	A	SESE_030592	MAT
Scaffold_274470	145671240	A	SESE_030592	MAT
Scaffold_274470	145672412	G	SESE_030592*	MAP
Scaffold_274470	165823743	A	.	MAT
Scaffold_274470	209166148	A	SESE_025281	MAT
Scaffold_274470	284652362	G	SESE_090540*	MAT
Scaffold_274470	284652718	A	SESE_090540*	MAT
Scaffold_274470	284652753	C	SESE_090540*	MAT
Scaffold_274470	326785512	G	.	MAP
Scaffold_274470	403905440	T	SESE_027530	AHM
Scaffold_274470	403905444	T	SESE_027530	AHM
Scaffold_274470	403905589	A	SESE_027530*	MAP
Scaffold_274470	403905726	A	SESE_027530*	AHM
Scaffold_274470	403905740	T	.	AHM
Scaffold_274470	403905747	T	.	AHM
Scaffold_274470	406243640	T	SESE_076584*	MAT
Scaffold_274470	406243759	T	SESE_076584*	MAT
Scaffold_274470	406243765	C	SESE_076584*	MAT
Scaffold_274470	413438879	G	.	MAP
Scaffold_274470	413997061	T	.	MAP
Scaffold_274470	413997075	T	.	MAP
Scaffold_274470	413997271	C	.	MAP
Scaffold_274470	413997410	T	SESE_031320*	MAP
Scaffold_274470	502675285	C	.	MAT
Scaffold_274470	504386691	C	.	MAT
Scaffold_274470	525274852	T	SESE_085538*	AHM
Scaffold_274470	525274931	G	SESE_085538*	AHM
Scaffold_274470	525275132	C	SESE_085538	AHM
Scaffold_274470	525275133	T	SESE_085538	AHM
Scaffold_274470	525275136	C	SESE_085538	AHM
Scaffold_274470	525279579	G	SESE_085538*	CMD
Scaffold_274470	525279591	A	SESE_085538	AHM
Scaffold_274470	525279607	A	SESE_085538*	CMD
Scaffold_274470	525279652	T	SESE_085538*	CMD
Scaffold_274470	525279670	T	SESE_085538	CMD
Scaffold_274470	558634299	G	.	MAT
Scaffold_274470	621754392	T	.	AHM
Scaffold_274470	621754434	T	.	AHM
Scaffold_274470	621754515	A	.	AHM
Scaffold_274470	621754520	C	.	AHM
Scaffold_274470	621754552	C	.	AHM
Scaffold_274470	621754598	A	.	AHM
Scaffold_274470	621754655	A	.	AHM
Scaffold_274470	621754940	T	.	AHM
Scaffold_274470	621754992	A	.	AHM
Scaffold_274470	668961838	G	.	AHM
Scaffold_274470	695683057	T	SESE_058590*	MAT
Scaffold_274470	695684191	C	SESE_058590*	MAT
Scaffold_274470	695685761	C	SESE_058590*	MAT
Scaffold_274470	763832187	G	.	MAP
Scaffold_274470	784519543	G	.	MAT
Scaffold_277755	188340	T	.	AHM
Scaffold_282073	103456	A	.	AHM
Scaffold_282073	103636	G	.	AHM
Scaffold_285622	10567	T	.	MAT
Scaffold_290852	12377	T	SESE_105044*	AHM
Scaffold_30082	96738	C	.	MAT
Scaffold_301026	57478	G	SESE_099649	AHM
Scaffold_302117	192990	A	.	MAT
Scaffold_327349	15796763	C	.	CMD
Scaffold_327349	15796951	A	SESE_122154*	CMD
Scaffold_327349	15797045	G	SESE_122154	CMD
Scaffold_327349	43846283	T	SESE_000644	MAT
Scaffold_327349	52258758	C	SESE_076253*	AHM
Scaffold_327349	62691356	C	.	MAT
Scaffold_327349	62691357	A	.	CMD
Scaffold_327349	62691546	T	.	CMD
Scaffold_327349	99940531	A	.	MAT
Scaffold_327349	99940532	T	.	MAT
Scaffold_327349	104067048	T	.	AHM
Scaffold_327349	104067112	C	.	AHM
Scaffold_327349	104068204	C	.	AHM
Scaffold_327349	159237916	T	.	AHM
Scaffold_327349	161369050	T	.	MAT
Scaffold_327349	170135223	C	.	MAT
Scaffold_327349	170135314	A	.	MAT
Scaffold_327349	170135351	T	.	MAT
Scaffold_327349	170135394	A	.	MAT
Scaffold_327349	214799161	A	.	AHM
Scaffold_327349	214799247	T	.	AHM
Scaffold_327349	214799336	T	.	AHM
Scaffold_327349	241543805	C	.	AHM
Scaffold_327349	241544214	T	.	AHM
Scaffold_327349	241545037	A	SESE_028821*	AHM
Scaffold_330512	111771686	C	SESE_008056	CMD
Scaffold_330512	169124625	T	.	CMD
Scaffold_330512	83052761	G	SESE_015231*	MAP
Scaffold_330512	135333331	G	SESE_025033	MAP
Scaffold_330512	196143030	A	.	MAP
Scaffold_330512	233790164	T	SESE_058212	MAP
Scaffold_330512	104869676	C	SESE_013042	MAT
Scaffold_330512	135334130	C	SESE_029655	MAT
Scaffold_330512	135337206	G	.	MAT
Scaffold_330512	235057996	A	.	MAT
Scaffold_331017	169959	C	SESE_027814*	AHM
Scaffold_331019	313088	T	SESE_107637	MAT
Scaffold_332052	19710031	C	.	AHM
Scaffold_332052	19710059	A	.	AHM
Scaffold_332052	30305543	G	.	AHM
Scaffold_332052	30305547	A	.	AHM
Scaffold_332052	30305552	C	.	AHM
Scaffold_332052	98648705	A	SESE_093968*	MAP
Scaffold_332832	38511	T	.	MAT
Scaffold_332912	27369	C	.	CMD
Scaffold_333761	102887	G	SESE_072458	AHM
Scaffold_333959	157657	T	SESE_013024	AHM
Scaffold_333959	158741	A	SESE_024149	AHM
Scaffold_333959	159493	A	SESE_013024	AHM
Scaffold_334187	196716	T	.	MAT
Scaffold_334536	73966	G	.	AHM
Scaffold_336091	249556	A	.	AHM
Scaffold_336345	220585	T	SESE_000507	MAT
Scaffold_339844	69966	T	.	CMD
Scaffold_339844	70049	A	.	CMD
Scaffold_342150	52079	T	.	MAP
Scaffold_342150	52087	G	.	MAP
Scaffold_342150	52089	C	.	MAP
Scaffold_342150	52104	T	.	MAP
Scaffold_342150	52000	T	.	MAT
Scaffold_343581	50428796	A	.	CMD
Scaffold_343581	50428797	G	.	CMD
Scaffold_343581	54768135	C	.	CMD
Scaffold_343581	59478336	C	.	MAP
Scaffold_343581	96718138	A	SESE_018016	AHM
Scaffold_343581	111508709	T	SESE_035701	MAT
Scaffold_343581	159208036	T	.	AHM
Scaffold_343581	176272057	G	.	MAP
Scaffold_343581	176272334	T	.	MAP
Scaffold_343581	267648843	G	.	MAT
Scaffold_343581	281095954	A	SESE_016528	AHM
Scaffold_343581	299379013	T	.	CMD
Scaffold_343581	299379039	C	.	CMD
Scaffold_343581	308878160	G	SESE_026341*	MAP
Scaffold_343581	308878206	G	SESE_026341	MAP
Scaffold_343581	308878217	T	SESE_026341	MAP
Scaffold_343581	308878296	A	SESE_026341	MAP
Scaffold_343581	308878328	C	SESE_026341*	MAP
Scaffold_343581	352964558	C	.	AHM
Scaffold_343581	353365272	G	.	AHM
Scaffold_343581	417875088	A	SESE_024373	AHM
Scaffold_343581	428558013	G	.	CMD
Scaffold_343581	471592505	T	.	AHM
Scaffold_343581	471592563	A	.	MAP
Scaffold_343581	520371602	G	.	CMD
Scaffold_343581	520371606	A	.	CMD
Scaffold_343581	520371608	T	.	CMD
Scaffold_343581	521246260	T	SESE_052707*	MAT
Scaffold_343581	521246261	T	SESE_052707*	MAT
Scaffold_343581	527002774	A	.	AHM
Scaffold_343581	555117890	G	.	AHM
Scaffold_343581	555118253	A	.	AHM
Scaffold_343581	607084875	C	SESE_035712*	MAT
Scaffold_343581	636138573	C	SESE_037298	AHM
Scaffold_343581	636139342	A	SESE_037298*	AHM
Scaffold_343581	713546501	C	.	MAT
Scaffold_343581	734402501	A	.	MAP
Scaffold_343581	734402503	T	.	MAP
Scaffold_343581	769293307	T	SESE_024381*	AHM
Scaffold_343581	769293411	C	.	AHM
Scaffold_343581	778366701	T	.	AHM
Scaffold_343581	802952236	T	SESE_030655	MAP
Scaffold_343581	818723099	C	SESE_025924*	MAP
Scaffold_343581	819508503	G	SESE_031497*	MAT
Scaffold_343581	819508509	T	SESE_031497*	MAT
Scaffold_343748	609405	C	SESE_004633*	AHM
Scaffold_343782	52031	A	.	CMD
Scaffold_343833	85502	C	.	CMD
Scaffold_344217	40567447	A	.	AHM
Scaffold_344217	95032373	G	SESE_020081	AHM
Scaffold_344217	130393655	T	.	AHM
Scaffold_344217	133567445	C	SESE_026090*	AHM
Scaffold_344217	133567556	T	.	AHM
Scaffold_344217	144188623	A	.	AHM
Scaffold_344217	369209201	C	SESE_004472	AHM
Scaffold_344217	430449205	G	.	AHM
Scaffold_344217	430449523	T	.	AHM
Scaffold_344217	622902435	A	SESE_030382*	AHM
Scaffold_344217	754257359	C	.	AHM
Scaffold_344217	911719168	T	.	AHM
Scaffold_344217	971567016	C	.	AHM
Scaffold_344217	973419152	T	.	AHM
Scaffold_344217	984626746	C	.	AHM
Scaffold_344217	1004050386	C	.	AHM
Scaffold_344217	1032863489	T	SESE_032290*	AHM
Scaffold_344217	1195841581	C	SESE_015860	AHM
Scaffold_344217	1203879971	A	.	AHM
Scaffold_344217	1209408145	C	SESE_027237	AHM
Scaffold_344217	144186955	C	.	CMD
Scaffold_344217	144186966	T	.	CMD
Scaffold_344217	144186980	A	.	CMD
Scaffold_344217	144186982	A	.	CMD
Scaffold_344217	144187218	T	SESE_034033*	CMD
Scaffold_344217	144188031	C	SESE_034033	CMD
Scaffold_344217	144188549	A	.	CMD
Scaffold_344217	151158111	T	.	CMD
Scaffold_344217	151158112	G	.	CMD
Scaffold_344217	151158145	A	.	CMD
Scaffold_344217	162112771	T	SESE_013208	CMD
Scaffold_344217	462016434	G	SESE_038740*	CMD
Scaffold_344217	546600338	C	.	CMD
Scaffold_344217	546600391	A	.	CMD
Scaffold_344217	546600742	C	SESE_002185*	CMD
Scaffold_344217	622902468	C	SESE_030382*	CMD
Scaffold_344217	622902480	A	SESE_030382*	CMD
Scaffold_344217	622902519	A	SESE_030382*	CMD
Scaffold_344217	622902520	T	SESE_030382*	CMD
Scaffold_344217	622902595	C	SESE_030382	CMD
Scaffold_344217	821686603	A	.	CMD
Scaffold_344217	1127421081	G	.	CMD
Scaffold_344217	1274559316	G	.	CMD
Scaffold_344217	40567423	T	.	MAP
Scaffold_344217	127312932	T	SESE_002924	MAP
Scaffold_344217	217711734	T	SESE_024707	MAP
Scaffold_344217	217712998	C	SESE_024707*	MAP
Scaffold_344217	218310935	C	.	MAP
Scaffold_344217	218311764	T	SESE_027943	MAP
Scaffold_344217	218312324	A	SESE_027943*	MAP
Scaffold_344217	271690451	C	SESE_029966*	MAP
Scaffold_344217	281244566	A	SESE_000474*	MAP
Scaffold_344217	363653944	C	SESE_040676*	MAP
Scaffold_344217	363654042	T	SESE_040676*	MAP
Scaffold_344217	363654052	T	SESE_040676*	MAP
Scaffold_344217	509585634	T	.	MAP
Scaffold_344217	673247466	C	.	MAP
Scaffold_344217	941321059	A	.	MAP
Scaffold_344217	1004223797	C	SESE_026949	MAP
Scaffold_344217	1032885694	T	SESE_032290*	MAP
Scaffold_344217	1247151985	C	.	MAP
Scaffold_344217	354885432	A	.	MAT
Scaffold_344217	354885546	A	.	MAT
Scaffold_344217	363653971	G	SESE_040676*	MAT
Scaffold_344217	392454383	A	.	MAT
Scaffold_344217	392897534	C	.	MAT
Scaffold_344217	513949149	T	SESE_030219*	MAT
Scaffold_344217	513949188	C	SESE_030219*	MAT
Scaffold_344217	513949189	C	SESE_030219*	MAT
Scaffold_344217	514646919	C	.	MAT
Scaffold_344217	514669423	T	SESE_026105*	MAT
Scaffold_344217	606366123	G	.	MAT
Scaffold_344217	712730975	C	SESE_030354	MAT
Scaffold_344217	771614569	C	SESE_035122*	MAT
Scaffold_344217	777313152	C	SESE_038773*	MAT
Scaffold_344217	887571236	G	.	MAT
Scaffold_344217	887571237	C	.	MAT
Scaffold_344217	975808638	C	SESE_035587	MAT
Scaffold_344217	977039547	G	.	MAT
Scaffold_344217	977039561	G	.	MAT
Scaffold_344217	1254483310	C	SESE_032016	MAT
Scaffold_344217	1265951441	C	SESE_028233*	MAT
Scaffold_346494	42692	A	SESE_128311*	AHM
Scaffold_346494	42696	C	SESE_128311*	AHM
Scaffold_346494	42703	C	SESE_128311*	AHM
Scaffold_346494	42711	A	SESE_128311*	AHM
Scaffold_346494	42714	C	SESE_128311*	AHM
Scaffold_346494	42730	G	SESE_128311*	AHM
Scaffold_346494	42758	G	SESE_128311*	AHM
Scaffold_346494	42804	T	SESE_128311*	AHM
Scaffold_346494	42813	T	SESE_128311*	AHM
Scaffold_346494	42822	T	SESE_128311*	AHM
Scaffold_346494	42843	C	SESE_128311*	AHM
Scaffold_347238	21002994	A	SESE_098354	CMD
Scaffold_347238	21004778	C	SESE_098354	CMD
Scaffold_347238	9003762	T	SESE_004680*	MAP
Scaffold_347238	9004365	A	SESE_004680*	MAP
Scaffold_347238	21004636	G	SESE_098354	MAT
Scaffold_347238	21004638	G	SESE_098354	MAT
Scaffold_347238	21004651	G	SESE_098354	MAT
Scaffold_347238	21004654	A	SESE_098354	MAT
Scaffold_347295	112997	A	.	AHM
Scaffold_347959	53107	C	SESE_079497	AHM
Scaffold_347959	53689	T	SESE_079497*	MAT
Scaffold_353338	11821467	A	SESE_031841*	AHM
Scaffold_353338	45243710	T	.	AHM
Scaffold_353338	45243846	A	SESE_053543*	AHM
Scaffold_353338	45243896	T	SESE_053543*	AHM
Scaffold_353338	45245083	T	SESE_053543*	AHM
Scaffold_353338	45245242	G	.	MAT
Scaffold_353338	100624902	T	SESE_040688	MAT
Scaffold_353338	100625105	A	SESE_040688*	MAT
Scaffold_353338	100625438	T	.	MAP
Scaffold_353338	100626040	G	.	CMD
Scaffold_353338	120359219	A	SESE_023967	CMD
Scaffold_353338	126422128	G	.	MAT
Scaffold_353338	175684258	A	SESE_028794	MAP
Scaffold_353338	179361883	A	SESE_025046	MAP
Scaffold_353338	223087828	A	SESE_038374*	MAT
Scaffold_353338	247294208	T	SESE_025798*	MAT
Scaffold_353338	371241178	C	SESE_021525	MAP
Scaffold_353338	404636952	T	SESE_024810	CMD
Scaffold_353338	435464897	G	.	CMD
Scaffold_353338	435464911	G	.	CMD
Scaffold_353338	474610799	C	SESE_042059*	CMD
Scaffold_353338	476935595	C	SESE_026726	MAP
Scaffold_353338	476935788	G	SESE_026726	MAP
Scaffold_353338	477337138	T	.	MAP
Scaffold_353338	478360707	G	SESE_036327	MAP
Scaffold_353338	485638401	A	SESE_036269	MAT
Scaffold_353338	541775810	C	.	MAT
Scaffold_353338	554105993	A	SESE_022446*	CMD
Scaffold_353338	596951952	C	.	AHM
Scaffold_353338	610497467	A	.	MAP
Scaffold_353338	610517025	C	.	MAT
Scaffold_353338	610517076	C	.	MAT
Scaffold_353338	610517095	G	.	MAT
Scaffold_353338	616834635	C	.	MAT
Scaffold_353338	636817939	T	.	CMD
Scaffold_353338	636994601	G	SESE_027733*	MAT
Scaffold_353338	645396970	C	SESE_037263*	AHM
Scaffold_353338	666089348	G	SESE_014841	CMD
Scaffold_353338	691314743	C	.	MAT
Scaffold_353338	759965857	T	SESE_003442*	AHM
Scaffold_353338	759976090	A	SESE_014070*	MAT
Scaffold_353338	759976100	C	SESE_014070*	MAT
Scaffold_353338	759984098	T	SESE_014070	MAT
Scaffold_353338	759984196	C	SESE_014070*	MAT
Scaffold_353338	776953636	C	.	MAP
Scaffold_353338	783576976	A	SESE_031930*	MAP
Scaffold_353338	783603095	T	.	MAP
Scaffold_353338	783603188	T	.	AHM
Scaffold_353338	867062018	T	.	CMD
Scaffold_353338	893637672	C	.	AHM
Scaffold_353338	898988296	G	SESE_001005*	AHM
Scaffold_353338	904817611	G	SESE_031191	MAT
Scaffold_353338	1002261527	T	.	MAP
Scaffold_353338	1002261688	T	.	MAP
Scaffold_353338	1002268421	T	.	MAP
Scaffold_353338	1002268686	C	.	MAP
Scaffold_353338	1002271295	A	.	MAP
Scaffold_353338	1002271373	G	.	MAP
Scaffold_353338	1008377423	T	SESE_045046*	MAP
Scaffold_354865	144316	G	.	AHM
Scaffold_36326	2945797	A	SESE_006440	CMD
Scaffold_36326	10107628	C	.	MAP
Scaffold_36326	42907016	T	.	MAT
Scaffold_37059	61367	A	.	CMD
Scaffold_37059	61469	T	.	CMD
Scaffold_371708	62334	T	.	MAP
Scaffold_3726	133859	G	.	AHM
Scaffold_3726	133821	A	.	MAP
Scaffold_3726	133908	C	.	MAP
Scaffold_3726	133744	T	.	MAT
Scaffold_3726	133795	T	.	MAT
Scaffold_387868	3727942	T	SESE_017377	AHM
Scaffold_387868	108914175	T	.	MAT
Scaffold_387868	108914194	T	.	MAT
Scaffold_387868	108914196	G	.	MAT
Scaffold_387868	108914236	A	.	CMD
Scaffold_387868	115101593	A	.	AHM
Scaffold_387868	203322110	T	.	AHM
Scaffold_387868	210118734	C	.	CMD
Scaffold_387868	217961615	T	SESE_031495*	CMD
Scaffold_387868	236990799	C	.	AHM
Scaffold_387868	236990867	T	.	AHM
Scaffold_387868	246252705	A	SESE_031316*	MAT
Scaffold_387868	289916483	T	SESE_037770*	AHM
Scaffold_387868	290387195	A	SESE_050983*	AHM
Scaffold_387868	290975257	C	SESE_015823	AHM
Scaffold_387868	300984494	C	SESE_004380	CMD
Scaffold_387868	318824672	G	SESE_030065	AHM
Scaffold_387868	350052716	C	SESE_028584*	AHM
Scaffold_387868	368053987	C	SESE_032294	MAT
Scaffold_387868	374503167	C	SESE_031330	MAP
Scaffold_387868	381246006	G	.	AHM
Scaffold_387868	381912242	T	.	AHM
Scaffold_387868	388226781	G	.	MAT
Scaffold_387868	440557607	T	.	MAP
Scaffold_387868	491802546	C	.	CMD
Scaffold_387868	491846860	A	.	MAT
Scaffold_387868	491847008	G	.	MAT
Scaffold_387868	491847010	A	.	MAT
Scaffold_387868	491847044	C	.	MAT
Scaffold_387868	525428410	T	.	MAT
Scaffold_387868	560409983	C	.	MAP
Scaffold_387868	560412357	C	.	MAT
Scaffold_387868	646077075	C	.	MAP
Scaffold_387868	707477222	T	.	MAP
Scaffold_387868	709672299	A	SESE_029770*	AHM
Scaffold_387868	718712574	T	SESE_025840	MAT
Scaffold_387868	803066179	G	.	AHM
Scaffold_387868	803066668	G	SESE_009323	MAT
Scaffold_387868	819524342	A	SESE_017871	AHM
Scaffold_387868	843403527	T	.	MAP
Scaffold_387868	846574819	G	.	CMD
Scaffold_387868	846574848	C	.	MAP
Scaffold_387868	846574869	C	.	CMD
Scaffold_387868	846574889	G	.	CMD
Scaffold_387868	846574973	A	.	CMD
Scaffold_387868	846575064	T	.	CMD
Scaffold_387868	846575118	T	.	CMD
Scaffold_387868	846575164	A	.	CMD
Scaffold_387868	846575190	T	.	CMD
Scaffold_387868	846575208	G	.	CMD
Scaffold_387868	846575231	G	.	CMD
Scaffold_387868	846575320	C	.	CMD
Scaffold_387868	846575536	T	.	CMD
Scaffold_387868	846575545	G	.	CMD
Scaffold_387868	846575594	T	.	CMD
Scaffold_387868	846592298	G	.	CMD
Scaffold_387868	846592317	C	.	CMD
Scaffold_387868	846592323	C	.	CMD
Scaffold_387868	846592355	T	.	CMD
Scaffold_387868	846592389	T	.	CMD
Scaffold_387868	846592407	T	.	CMD
Scaffold_387868	846592436	C	.	CMD
Scaffold_387937	131582	C	SESE_111042*	AHM
Scaffold_387937	131663	C	SESE_111042	AHM
Scaffold_387937	131752	G	SESE_111042	AHM
Scaffold_387937	132195	A	SESE_111042	AHM
Scaffold_387937	132422	T	SESE_111042	AHM
Scaffold_389377	251816	A	SESE_004804*	MAT
Scaffold_389566	57689	T	.	AHM
Scaffold_389566	57853	G	.	AHM
Scaffold_389871	201650	T	.	MAT
Scaffold_390367	110176	A	.	CMD
Scaffold_391611	82534	G	SESE_029842	AHM
Scaffold_392643	9715	C	.	MAP
Scaffold_44942	23509	T	.	MAP
Scaffold_48012	293929	T	SESE_101100*	MAP
Scaffold_52904	157521	T	.	MAP
Scaffold_54284	323120	T	SESE_021137	MAT
Scaffold_55055	79554	A	.	AHM
Scaffold_55055	79661	T	.	AHM
Scaffold_56362	172048	A	.	MAT
Scaffold_6176	350641	G	SESE_072658	MAP
Scaffold_6215	57023481	A	.	AHM
Scaffold_6215	96814707	A	.	AHM
Scaffold_6215	96814735	A	.	AHM
Scaffold_6215	325204255	C	SESE_115496	AHM
Scaffold_6215	325204633	G	SESE_115496	AHM
Scaffold_6215	325204945	C	.	AHM
Scaffold_6215	325204962	C	.	AHM
Scaffold_6215	325293337	T	.	AHM
Scaffold_6215	388053219	T	SESE_029111*	AHM
Scaffold_6215	479875508	G	SESE_108247*	AHM
Scaffold_6215	658117197	C	.	AHM
Scaffold_6215	301076644	G	SESE_074982*	CMD
Scaffold_6215	325204933	G	.	CMD
Scaffold_6215	325205109	A	.	CMD
Scaffold_6215	346708045	A	.	CMD
Scaffold_6215	346708097	T	.	CMD
Scaffold_6215	397180446	C	SESE_106757*	CMD
Scaffold_6215	398497422	C	SESE_056104	CMD
Scaffold_6215	425023203	G	.	CMD
Scaffold_6215	165688805	A	.	MAP
Scaffold_6215	165689079	C	.	MAP
Scaffold_6215	325293312	A	.	MAP
Scaffold_6215	325293489	G	.	MAP
Scaffold_6215	425023385	C	.	MAP
Scaffold_6215	575298996	C	SESE_027435	MAP
Scaffold_6215	113604235	T	SESE_007516*	MAT
Scaffold_6215	282372955	G	SESE_012788	MAT
Scaffold_6215	288841381	A	SESE_123278	MAT
Scaffold_6215	288841474	C	SESE_123278	MAT
Scaffold_6215	325204982	T	.	MAT
Scaffold_6215	410783577	T	SESE_076442*	MAT
Scaffold_6215	423822679	A	.	MAT
Scaffold_6215	446642578	C	SESE_075615	MAT
Scaffold_6215	446838986	C	.	MAT
Scaffold_6215	446839145	A	.	MAT
Scaffold_6215	446839327	G	.	MAT
Scaffold_6215	446867129	T	.	MAT
Scaffold_6215	481811150	G	.	MAT
Scaffold_6215	481811221	G	.	MAT
Scaffold_6215	556166360	T	.	MAT
Scaffold_6407	175119162	A	SESE_112045	AHM
Scaffold_6407	336747599	T	.	AHM
Scaffold_6407	376582312	C	SESE_094426*	AHM
Scaffold_6407	390984032	A	SESE_085364*	AHM
Scaffold_6407	262260241	C	.	CMD
Scaffold_6407	287855101	C	SESE_096943	CMD
Scaffold_6407	376587188	G	.	CMD
Scaffold_6407	392099858	A	SESE_093462*	CMD
Scaffold_6407	413636801	C	.	CMD
Scaffold_6407	72957368	T	SESE_022842	MAP
Scaffold_6407	72957380	C	SESE_022842	MAP
Scaffold_6407	397300101	T	.	MAP
Scaffold_6407	72957437	T	SESE_022842	MAT
Scaffold_6407	153503583	G	SESE_031095*	MAT
Scaffold_6407	153506688	G	SESE_031095	MAT
Scaffold_6407	153510309	A	.	MAT
Scaffold_6407	153510445	A	.	MAT
Scaffold_6407	277258492	T	.	MAT
Scaffold_6407	277406863	C	.	MAT
Scaffold_6407	277406902	A	.	MAT
Scaffold_6407	277406909	T	.	MAT
Scaffold_6407	277407171	T	SESE_106885*	MAT
Scaffold_6407	277407370	G	SESE_106885*	MAT
Scaffold_6407	277407607	T	SESE_106885*	MAT
Scaffold_6407	277407697	A	SESE_106885*	MAT
Scaffold_6407	277407843	G	SESE_106885	MAT
Scaffold_6407	277407848	C	SESE_106885	MAT
Scaffold_6407	277407994	T	SESE_106885	MAT
Scaffold_6407	376583486	G	SESE_094426	MAT
Scaffold_6407	376583694	C	SESE_094426	MAT
Scaffold_65884	1814	A	SESE_071431*	AHM
Scaffold_67120	336154	C	SESE_113916*	CMD
Scaffold_67120	335918	G	SESE_113916*	MAP
Scaffold_67120	335919	C	SESE_113916*	MAP
Scaffold_68257	24924412	A	SESE_029899*	AHM
Scaffold_68257	137117121	A	.	CMD
Scaffold_68257	147766882	A	SESE_068947	CMD
Scaffold_68257	240779778	A	SESE_097243	CMD
Scaffold_68257	240779805	G	SESE_097243	CMD
Scaffold_68257	240779807	T	SESE_097243	CMD
Scaffold_68257	240779814	C	SESE_097243*	CMD
Scaffold_68257	240782392	A	SESE_097243*	CMD
Scaffold_68257	240782393	A	SESE_097243*	CMD
Scaffold_68257	16461807	T	SESE_017151	MAP
Scaffold_68257	16461294	T	SESE_017151	MAT
Scaffold_68257	24924522	A	.	MAT
Scaffold_68257	146715581	C	SESE_001243*	MAT
Scaffold_68257	146715582	A	SESE_001243*	MAT
Scaffold_68257	146715591	G	SESE_001243*	MAT
Scaffold_68257	154985788	C	SESE_001827*	MAT
Scaffold_68257	155475943	C	.	MAT
Scaffold_68257	166064211	A	.	MAT
Scaffold_68257	171587676	C	SESE_132171*	MAT
Scaffold_68257	176067586	C	SESE_008220	MAT
Scaffold_68257	180214627	G	.	MAT
Scaffold_68679	22263	C	SESE_085834	AHM
Scaffold_70290	211541	G	.	MAP
Scaffold_74602	237529	G	SESE_024421*	AHM
Scaffold_77038	241171	G	.	MAT
Scaffold_77166	83009	T	.	AHM
Scaffold_81965	26396206	A	SESE_101398*	MAT
Scaffold_81965	65140394	C	.	MAT
Scaffold_81965	65140611	T	.	MAT
Scaffold_81965	65142283	T	.	MAT
Scaffold_81965	66287441	C	.	MAT
Scaffold_81965	68537254	T	.	AHM
Scaffold_81965	100063057	T	.	CMD
Scaffold_81965	100251123	G	.	MAT
Scaffold_81965	138862845	C	SESE_003989	AHM
Scaffold_81965	172172367	A	.	CMD
Scaffold_81965	247664099	G	.	MAT
Scaffold_81965	325733835	T	SESE_006691*	MAP
Scaffold_81965	325733878	C	SESE_006691*	MAP
Scaffold_81965	325733905	C	SESE_006691*	MAP
Scaffold_81965	325733911	C	SESE_006691*	MAP
Scaffold_84697	286358	A	.	MAT
Scaffold_84697	287770	T	.	MAT
Scaffold_84697	287801	T	.	MAT
Scaffold_86244	242074	T	.	MAP
Scaffold_86244	242269	A	.	MAT
Scaffold_87379	38862	A	.	CMD
Scaffold_87379	39098	A	.	CMD
Scaffold_87677	148326258	A	.	AHM
Scaffold_87677	147844265	C	.	MAT
Scaffold_8810	178348	A	.	AHM
Scaffold_8817	148547	G	.	MAT
Scaffold_90201	72384	G	.	MAP
Scaffold_91299	203104	T	.	AHM
Scaffold_94993	35345	C	.	AHM
Scaffold_94993	35035	A	.	CMD
Scaffold_94993	35108	G	.	CMD
Scaffold_9817	31400	G	SESE_024652	AHM
Scaffold_98868	173412	C	SESE_029242*	MAT
*represents SNPs in both gene and CDS

## Sheet: Table S7
Table S7. Significant SNPs shared among GEA methods in coast redwood. The table contains the candidate SNPs genomic positions, and associated genes.
Scaffold	Position	SNPs	Gene
Scaffold_126231	22282	C	SESE_089222
Scaffold_167773	207125440	G	SESE_020758*
Scaffold_181730	102627731	G	.
Scaffold_181730	102628357	T	SESE_121765
Scaffold_181730	102633466	T	SESE_121765*
Scaffold_181730	102794048	C	.
Scaffold_181730	118020287	A	SESE_067476*
Scaffold_203021	548254633	C	SESE_048862*
Scaffold_330512	196143030	N	.
Scaffold_68679	22263	C	SESE_085834*

## Sheet: Table S8
Table S8. Functional annotation of candidate genes associated with different environmental variables in giant sequoia. The table contains similar search IDs of the candidate genes, detailed annotation, protein family and pathways, and gene ontology terms.
Gene	Similar Search	Similarity Precentage	Environmental variable	Description	EggNOG Description	PFAM Description	KEGG Description	Pathways/KEGG-Brite	Gene Ontology: Biological Process	Gene Ontology: Cellular Process	Gene Ontology: Molecular Function
SEGI_09259	XP_024449205.1	51	CMD	11-beta-hydroxysteroid dehydrogenase-like	NA	short chain dehydrogenase	11beta/17beta-hydroxysteroid dehydrogenase	Oxidoreductases	GO:0008152-metabolic process(L=1),	NA	GO:0003824-catalytic activity(L=1),
SEGI_29666	XP_006841530.1	44	CMD	major pollen allergen Bet v 1-F/I	Pathogenesis-related protein	Pathogenesis-related protein Bet v I family	major pollen allergen Bet v 1-F/I	NA	GO:0050896-response to stimulus(L=1),	NA	NA
SEGI_06629	XP_030480531.1	57	CMD	membrane protein PM19L-like	AWPM-19-like membrane family protein	AWPM-19-like family	membrane protein PM19L-like	NA	NA	NA	NA
SEGI_10011	NA	NA	CMD	NA	NA	NA	Serine/threonine-protein kinase	Protein kinases	NA	NA	NA
SEGI_19226	XP_011623589.1	48	CMD	pre-rRNA-processing protein TSR2	Pre-rRNA-processing protein	NA	pre-rRNA-processing protein TSR2	Ribosome biogenesis	NA	NA	NA
SEGI_18436	XP_022981662.1	41	CMD	protein trichome birefringence	NA	GDSL/SGNH-like Acyl-Esterase family found in Pmr5 and Cas1p	protein trichome birefringence-like 36	NA	GO:0008152-metabolic process(L=1),GO:0009987-cellular process(L=1),	NA	GO:0003824-catalytic activity(L=1),GO:0005488-binding(L=1),
SEGI_31880	OMO86337.1	33	CMD	reverse transcriptase	Retrotransposon protein	NA	uncharacterized protein	NA	NA	NA	GO:0005488-binding(L=1),
SEGI_13597	XP_018839917.1	35	CMD	uncharacterized protein	expressed protein	NA	uncharacterized protein	NA	GO:0008152-metabolic process(L=1),GO:0009987-cellular process(L=1),	NA	GO:0003824-catalytic activity(L=1),GO:0005488-binding(L=1),
SEGI_20855	XP_010695085.1	43	CMD	uncharacterized protein	zinc knuckle (CCHC-type) family protein	Domain of unknown function (DUF4283)	uncharacterized	NA	NA	NA	GO:0005488-binding(L=1),
SEGI_22232	XP_019706012.1	41	CMD	uncharacterized protein	Targeting protein for Xklp2 (TPX2)	Targeting protein for Xklp2 (TPX2)	protein WVD2-like 4, protein TPX2	NA	GO:0009987-cellular process(L=1),GO:0044699-single-organism process(L=1),GO:0071840-cellular component organization or biogenesis(L=1),	GO:0005623-cell(L=1),GO:0032991-macromolecular complex(L=1),GO:0043226-organelle(L=1),	NA
SEGI_09541	XP_028104787.1	69	CMD	vacuolar protein sorting-associated protein	Protein fat-free homolog	NA	acuolar protein sorting-associated protein 51	Membrane trafficking	NA	NA	NA
SEGI_31232	XP_019701365.1	77	FFP	isoamylase 3, chloroplastic	Isoamylase 3	Alpha amylase, catalytic domain	isoamylase	Starch and sucrose metabolism	GO:0008152-metabolic process(L=1),GO:0009987-cellular process(L=1),	GO:0005623-cell(L=1),GO:0043226-organelle(L=1),	GO:0003824-catalytic activity(L=1),GO:0005488-binding(L=1),
SEGI_17061	XP_020247872.1	71	FFP	protein CTR9	RNA polymerase-associated protein CTR9	NA	RNA polymerase-associated protein	RNA polymerase II system	GO:0008152-metabolic process(L=1),GO:0009987-cellular process(L=1),GO:0044699-single-organism process(L=1),GO:0065007-biological regulation(L=1),GO:0071840-cellular component organization or biogenesis(L=1),	GO:0016020-membrane(L=1),	NA
SEGI_22391	XP_021830538.1	83	MAP	dolichyl-diphosphooligosaccharide--protein glycosyltransferase	Essential subunit of the N-oligosaccharyl transferase (OST) complex which catalyzes the transfer of a high mannose oligosaccharide from a lipid-linked oligosaccharide donor to an asparagine residue within an Asn-X-Ser Thr consensus motif in nascent polypeptide chains (By similarity). Possesses cell death- inhibiting activity (By similarity)	DAD family	oligosaccharyltransferase complex subunit epsilon	N-Glycan biosynthesis,Metabolic pathways,Protein processing in endoplasmic reticulum	GO:0008152-metabolic process(L=1),GO:0009987-cellular process(L=1),GO:0044699-single-organism process(L=1),GO:0065007-biological regulation(L=1),	GO:0005623-cell(L=1),GO:0016020-membrane(L=1),GO:0032991-macromolecular complex(L=1),GO:0043226-organelle(L=1),	GO:0003824-catalytic activity(L=1),
SEGI_02591	XP_025797078.1	94	MAP	eukaryotic peptide chain release factor subunit 1-3	Eukaryotic peptide chain release factor subunit	eRF1 domain 2	peptide chain release factor subunit 1	mRNA surveillance pathway	GO:0008152-metabolic process(L=1),GO:0009987-cellular process(L=1),GO:0044699-single-organism process(L=1),GO:0071840-cellular component organization or biogenesis(L=1),	GO:0005623-cell(L=1),GO:0016020-membrane(L=1),	GO:0005488-binding(L=1),
SEGI_01196	ABR18056.1	47	MAP	hypothetical protein	LRR receptor-like serine threonine-protein kinase	Leucine rich repeat	LRR receptor-like serine/threonine-protein kinase	MAPK signaling pathway, Plant-pathogen interaction	GO:0008152-metabolic process(L=1),GO:0009987-cellular process(L=1),	GO:0016020-membrane(L=1),	GO:0003824-catalytic activity(L=1),GO:0005488-binding(L=1),
SEGI_00815	XP_024391344.1	41	MAP	neurochondrin-like isoform X2	Neurochondrin	NA	neurochondrin-like isoform X1	NA	NA	NA	NA
SEGI_34257	XP_006853048.2	48	MAP	pectinesterase	pectinesterase	Pectinesterase	pectinesterase	Pentose and glucuronate interconversions	GO:0008152-metabolic process(L=1),GO:0009987-cellular process(L=1),GO:0044699-single-organism process(L=1),GO:0050896-response to stimulus(L=1),GO:0051704-multi-organism process(L=1),GO:0065007-biological regulation(L=1),GO:0071840-cellular component organization or biogenesis(L=1),	GO:0005576-extracellular region(L=1),GO:0005623-cell(L=1),GO:0016020-membrane(L=1),	GO:0003824-catalytic activity(L=1),
SEGI_04086	XP_006845785.1	60	MAP	probable inactive purple acid phosphatase 28 isoform X4	inactive purple acid phosphatase	Calcineurin-like phosphoesterase	inactive purple acid phosphatase 28	NA	GO:0008152-metabolic process(L=1),GO:0009987-cellular process(L=1),	GO:0005576-extracellular region(L=1),	GO:0003824-catalytic activity(L=1),GO:0005488-binding(L=1),
SEGI_21478	XP_027940045.1	58	MAP	probable LRR receptor-like serine/threonine-protein kinase	LRR receptor-like serine threonine-protein kinase	Protein kinase domain	LRR receptor-like serine/threonine-protein kinase	NA	GO:0008152-metabolic process(L=1),GO:0009987-cellular process(L=1),	GO:0005623-cell(L=1),GO:0016020-membrane(L=1),GO:0043226-organelle(L=1),	GO:0003824-catalytic activity(L=1),GO:0005488-binding(L=1),
SEGI_29292	XP_030552736.1	75	MAP	serine/threonine-protein kinase SAPK7-like	serine threonine-protein kinase	Protein kinase domain	serine/threonine-protein kinase SRK2	MAPK signaling pathway	GO:0008152-metabolic process(L=1),GO:0009987-cellular process(L=1),GO:0023052-signaling(L=1),GO:0032501-multicellular organismal process(L=1),GO:0032502-developmental process(L=1),GO:0040007-growth(L=1),GO:0044699-single-organism process(L=1),GO:0050896-response to stimulus(L=1),GO:0051704-multi-organism process(L=1),GO:0065007-biological regulation(L=1),	GO:0005623-cell(L=1),GO:0043226-organelle(L=1),	GO:0003824-catalytic activity(L=1),GO:0005488-binding(L=1),
SEGI_25599	XP_011620495.1	45	MAP	UDP-glycosyltransferase 86A2	transferase activity, transferring hexosyl groups	UDP-glucoronosyl and UDP-glucosyl transferase	UDP-glycosyltransferase 86A2	NA	GO:0008152-metabolic process(L=1),		GO:0003824-catalytic activity(L=1),
SEGI_29217	XP_022864121.1	50	MAP	uncharacterized protein	Plant protein of unknown function (DUF946)	NA	vacuolar protein sorting-associated protein 13A/C	Membrane trafficking	NA	NA	GO:0005488-binding(L=1),
SEGI_09865	XP_014110068.1	57	MAP	uncharacterized protein	Retrotransposon protein	NA	netrin-G2	Axon guidance	GO:0008152-metabolic process(L=1),GO:0009987-cellular process(L=1),	NA	GO:0003824-catalytic activity(L=1),GO:0005488-binding(L=1),
SEGI_21288	XP_019108059.1	33	MAP	uncharacterized protein	Retrotransposon protein	NA	uncharacterized mitochondrial protein	NA	GO:0008152-metabolic process(L=1),GO:0009987-cellular process(L=1),GO:0044699-single-organism process(L=1),GO:0051179-localization(L=1),	GO:0005623-cell(L=1),GO:0016020-membrane(L=1),GO:0043226-organelle(L=1),	GO:0003824-catalytic activity(L=1),GO:0005215-transporter activity(L=1),GO:0005488-binding(L=1),
SEGI_37058	XP_010539577.1	39	MAP	uncharacterized protein	mitochondrial transcription termination factor family protein	mTERF	mTERF domain-containing protein, mitochondrial	Mitochondrial biogenesis	NA	NA	NA
SEGI_34105	XP_031385060.1	45	MSP	GDSL esterase/lipase At5g22810-like	GDSL esterase lipase	GDSL-like Lipase/Acylhydrolase	GDSL esterase/lipase	NA	GO:0008152-metabolic process(L=1),	GO:0005576-extracellular region(L=1),	GO:0003824-catalytic activity(L=1),
SEGI_24707	ABK21926.1	39	MSP	hypothetical protein	NA	NA	uncharacterized protein	NA	NA	NA	NA
SEGI_33223	XP_020242721.1	61	MSP	linoleate 9S-lipoxygenase 5, chloroplastic-like	Plant lipoxygenase may be involved in a number of diverse aspects of plant physiology including growth and development, pest resistance, and senescence or responses to wounding (By similarity)	Lipoxygenase	linoleate 9S-lipoxygenase	Linoleic acid metabolism	GO:0002376-immune system process(L=1),GO:0008152-metabolic process(L=1),GO:0009987-cellular process(L=1),GO:0032501-multicellular organismal process(L=1),GO:0032502-developmental process(L=1),GO:0044699-single-organism process(L=1),GO:0050896-response to stimulus(L=1),GO:0051704-multi-organism process(L=1),GO:0065007-biological regulation(L=1),	GO:0005623-cell(L=1),GO:0043226-organelle(L=1),	GO:0003824-catalytic activity(L=1),GO:0005488-binding(L=1),GO:0016209-antioxidant activity(L=1),
SEGI_27020	XP_024542551.1	39	MSP	NFX1-type zinc finger-containing protein	NFX1-type zinc finger-containing protein	AAA domain	NFX1-type zinc finger-containing protein 1-like	NA	GO:0008152-metabolic process(L=1),GO:0009987-cellular process(L=1),GO:0044699-single-organism process(L=1),GO:0065007-biological regulation(L=1),GO:0071840-cellular component organization or biogenesis(L=1),	GO:0005623-cell(L=1),GO:0032991-macromolecular complex(L=1),GO:0043226-organelle(L=1),	GO:0001071-nucleic acid binding transcription factor activity(L=1),GO:0003824-catalytic activity(L=1),GO:0005488-binding(L=1),
SEGI_09261	XP_006837387.1	85	MSP	probable enoyl-CoA hydratase 2, mitochondrial	hydratase	Enoyl-CoA hydratase/isomerase	methylglutaconyl-CoA hydratase	Valine, leucine and isoleucine degradation	GO:0008152-metabolic process(L=1),		GO:0003824-catalytic activity(L=1),GO:0005488-binding(L=1),
SEGI_33526	XP_010922745.1	41	MSP	taxane 13-alpha-hydroxylase	Cytochrome P450	Cytochrome P450	taxadiene 5-alpha hydroxylase-like	NA	GO:0008152-metabolic process(L=1),		GO:0003824-catalytic activity(L=1),GO:0005488-binding(L=1),GO:0009055-electron carrier activity(L=1),
SEGI_11478	XP_020687175.1	31	MSP	uncharacterized protein	zinc finger protein	NA	uncharacterized	NA	NA	NA	GO:0005488-binding(L=1),
SEGI_24670	XP_027090446.1	39	MSP	uncharacterized protein	Non-LTR retroelement reverse transcriptase	NA	uncharacterized protein	NA	GO:0008152-metabolic process(L=1),GO:0009987-cellular process(L=1),		GO:0003824-catalytic activity(L=1),GO:0005488-binding(L=1),
SEGI_04694	XP_023511562.1	26	MSP	uncharacterized protein	NA	NA	uncharacterized protein	NA	NA	NA	NA
SEGI_01182	XP_017977390.1	81	MSP	uncharacterized protein	NA	NA	NADH dehydrogenase	Thermogenesis	NA	NA	NA
SEGI_21199	XP_021655669.1	44	MSP	uncharacterized protein	Uncharacterised protein family UPF0066	tRNA-methyltransferase O	tRNA (adenine37-N6)-methyltransferase	Transfer RNA biogenesis	NA	NA	NA
SEGI_24916	XP_030931300.1	23	MSP	uncharacterized protein	Retrotransposon protein	Domain of unknown function (DUF4283)	uncharacterized protein	NA	NA	NA	GO:0005488-binding(L=1),
SEGI_14834	XP_002868255.1	36	MSP	uncharacterized protein	NA	NA	neurogenic locus notch homolog protein 1	NA	NA	GO:0016020-membrane(L=1),	NA
SEGI_11925	NA	NA	NFFD	NA	NA	NA	SHC-transforming protein 4 isoform X1	EGFR tyrosine kinase inhibitor resistance	NA	NA	NA
SEGI_30531	XP_031114397.1	78	NFFD	translationally-controlled tumor protein	translationally-controlled tumor protein homolog	Translationally controlled tumour protein	translationally-controlled tumor protein homolog	NA	GO:0000003-reproduction(L=1),GO:0009987-cellular process(L=1),GO:0032501-multicellular organismal process(L=1),GO:0032502-developmental process(L=1),GO:0040007-growth(L=1),GO:0044699-single-organism process(L=1),GO:0050896-response to stimulus(L=1),GO:0051704-multi-organism process(L=1),GO:0065007-biological regulation(L=1),GO:0071840-cellular component organization or biogenesis(L=1),	GO:0005576-extracellular region(L=1),GO:0005623-cell(L=1),GO:0016020-membrane(L=1),GO:0030054-cell junction(L=1),GO:0043226-organelle(L=1),GO:0055044-symplast(L=1),	GO:0005488-binding(L=1),
SEGI_08479	XP_018839180.1	49	NFFD	uncharacterized protein	fatty acid chain	Phosphopantetheine attachment site	uncharacterized protein	NA	GO:0008152-metabolic process(L=1),GO:0009987-cellular process(L=1),	GO:0005623-cell(L=1),GO:0043226-organelle(L=1),
SEGI_37506	XP_022741483.1	60	NFFD	uncharacterized protein	glycosyl transferase family 17 protein	Glycosyltransferase family 17	beta-1,4-mannosyl-glycoprotein beta-1,4-N-acetylglucosaminyltransferase	N-Glycan biosynthesis	GO:0008152-metabolic process(L=1),GO:0009987-cellular process(L=1),	GO:0016020-membrane(L=1),	GO:0003824-catalytic activity(L=1),
SEGI_02202	XP_020262610.1	35	PAS	serine/threonine-protein phosphatase 7	Serine threonine-protein phosphatase 7 long form homolog	Plant mobile domain	serine/threonine-protein phosphatase 7 long form homolog	NA	GO:0008152-metabolic process(L=1),GO:0009987-cellular process(L=1),GO:0023052-signaling(L=1),GO:0044699-single-organism process(L=1),GO:0050896-response to stimulus(L=1),GO:0065007-biological regulation(L=1),		GO:0003824-catalytic activity(L=1),GO:0005488-binding(L=1),
SEGI_09451	XP_023735169.1	48	PAS	DNA (cytosine-5)-methyltransferase DRM2	DNA (cytosine-5-)-methyltransferase	C-5 cytosine-specific DNA methylase	DNA (cytosine-5)-methyltransferase DRM1	NA	GO:0008152-metabolic process(L=1),GO:0009987-cellular process(L=1),GO:0044699-single-organism process(L=1),GO:0050896-response to stimulus(L=1),GO:0051704-multi-organism process(L=1),GO:0065007-biological regulation(L=1),GO:0071840-cellular component organization or biogenesis(L=1),	GO:0005623-cell(L=1),GO:0031974-membrane-enclosed lumen(L=1),GO:0043226-organelle(L=1),	GO:0003824-catalytic activity(L=1),GO:0005488-binding(L=1),
SEGI_01914	XP_020401554.1	42	PAS	pentatricopeptide repeat-containing protein	Pentatricopeptide repeat-containing protein	PPR repeat	pentatricopeptide repeat-containing protein	NA	NA	NA	NA
SEGI_18256	XP_024459855.1	42	PAS	uncharacterized protein	NA	NA	uncharacterized protein	NA	GO:0008152-metabolic process(L=1),GO:0009987-cellular process(L=1),		GO:0003824-catalytic activity(L=1),GO:0005488-binding(L=1),
SEGI_24660	XP_028804850.1	33	PAS	uncharacterized protein	NA	NA	uncharacterized protein	NA	NA	NA	NA

## Sheet: Table S9
Table S9. Functional annotation of candidate genes associated with different environmental variables in coast redwood. The table contains similar search IDs of the candidate genes, detailed annotation, protein family and pathways, and gene ontology terms.
Gene	Similarity Search	Percentage	Environmental variable	Description	Description	PFAM Description	KEGG Description	Pathways	Gene Ontology: Biological Process	Gene Ontology: Cellular Process	Gene Ontology: Molecular Function
SESE_105044	XP_008803292.2	62.5	AHM	2-methylene-furan-3-one reductase-like isoform X1	NA	Zinc-binding dehydrogenase	2-methylene-furan-3-one reductase	NA
SESE_004633	XP_024401967.1	48.1	AHM	50S ribosomal protein L34, chloroplastic-like	ribosomal protein L34	Ribosomal protein L34	large subunit ribosomal protein L34	Ribosome	GO:0008152-metabolic process(L=1),GO:0009987-cellular process(L=1),	GO:0005623-cell(L=1),GO:0032991-macromolecular complex(L=1),GO:0043226-organelle(L=1),	GO:0005198-structural molecule activity(L=1),GO:0005488-binding(L=1),
SESE_128311	XP_031480534.1	48.3	AHM	AAA-ATPase At4g25835-like	NA	ATPase family associated with various cellular activities (AAA)	mitochondrial chaperone BCS1	Mitochondrial biogenesis	NA	NA	NA
SESE_133812	XP_027109615.1	61.4	AHM	acidic endochitinase	Glycosyl hydrolases family 18	Glycosyl hydrolases family 18	chitinase	Amino sugar and nucleotide sugar metabolism	GO:0008152-metabolic process(L=1),	NA	GO:0003824-catalytic activity(L=1),
SESE_027530	XP_001942421.1	29.3	AHM	ankyrin repeat domain containing protein	NACHT domain	Ankyrin repeats (3 copies)	ankyrin repeat domain-containing protein 50	Membrane trafficking	GO:0008152-metabolic process(L=1),	NA	GO:0003824-catalytic activity(L=1),
SESE_029111	KAF3784664.1	59.1	AHM	argonaute 1A protein	Eukaryotic translation initiation factor 2C	NA	eukaryotic translation initiation factor	Axon regeneration	GO:0000003-reproduction(L=1),GO:0002376-immune system process(L=1),GO:0008152-metabolic process(L=1),GO:0009987-cellular process(L=1),GO:0023052-signaling(L=1),GO:0032501-multicellular organismal process(L=1),GO:0032502-developmental process(L=1),GO:0035278-miRNA mediated inhibition of translation(L=10),GO:0040011-locomotion(L=1),GO:0044699-single-organism process(L=1),GO:0050896-response to stim…	GO:0005623-cell(L=1),GO:0016020-membrane(L=1),GO:0031974-membrane-enclosed lumen(L=1),GO:0032991-macromolecular complex(L=1),GO:0043226-organelle(L=1),	GO:0001071-nucleic acid binding transcription factor activity(L=1),GO:0003824-catalytic activity(L=1),GO:0005198-structural molecule activity(L=1),GO:0005488-binding(L=1),
SESE_130738	XP_027152571.1	38.7	AHM	beta-D-glucosyl crocetin beta-1,6-glucosyltransferase	cyanidin-3-O-glucoside 2-O-glucuronosyltransferase-like	UDP-glucoronosyl and UDP-glucosyl transferase	UDP-glycosyltransferase 79B30	Flavone and flavonol biosynthesis	GO:0008152-metabolic process(L=1),	NA	GO:0003824-catalytic activity(L=1),
SESE_030382	XP_008782619.2	76.1	AHM	cationic peroxidase 1-like	peroxidase	Peroxidase	peroxidase	Phenylpropanoid biosynthesis	GO:0008152-metabolic process(L=1),GO:0009987-cellular process(L=1),GO:0044699-single-organism process(L=1),GO:0050896-response to stimulus(L=1),	GO:0005576-extracellular region(L=1),GO:0005623-cell(L=1),	GO:0003824-catalytic activity(L=1),GO:0005488-binding(L=1),GO:0016209-antioxidant activity(L=1),
SESE_028584	XP_015901731.1	27.8	AHM	COP1-interacting protein 7	expressed protein	NA	uncharacterized protein	NA	GO:0008152-metabolic process(L=1),GO:0009987-cellular process(L=1),	NA	GO:0003824-catalytic activity(L=1),GO:0005488-binding(L=1),
SESE_027993	XP_004247754.1	66.3	AHM	cyanate hydratase	Catalyzes the reaction of cyanate with bicarbonate to produce ammonia and carbon dioxide (By similarity)	Cyanate lyase C-terminal domain	cyanate lyase	Nitrogen metabolism	GO:0008152-metabolic process(L=1),GO:0009987-cellular process(L=1),GO:0050896-response to stimulus(L=1),	GO:0005623-cell(L=1),	GO:0003824-catalytic activity(L=1),GO:0005488-binding(L=1),
SESE_120015	XP_012847609.1	45.4	AHM	cytochrome P450 704B1	NA	Cytochrome P450	long-chain fatty acid omega-monooxygenase	Fatty acid degradation	NA	NA	NA
SESE_100967	XP_031479228.1	46.2	AHM	cytochrome P450 CYP82D47-like	NA	Cytochrome P450	cytochrome P450 CYP82D47	NA	NA	NA	NA
SESE_026779	WP_193450475.1	49.2	AHM	DDE-type integrase/transposase/recombinase	Tkp5 protein	NA	uncharacterized protein	NA	GO:0008152-metabolic process(L=1),GO:0009987-cellular process(L=1),	NA	GO:0003824-catalytic activity(L=1),GO:0005488-binding(L=1),
SESE_026833	WP_193450475.1	50	AHM	DDE-type integrase/transposase/recombinase	Inherit from meNOG: Hydra magnipapillata	Integrase core domain	uncharacterized protein	NA	GO:0008152-metabolic process(L=1),GO:0009987-cellular process(L=1),	NA	GO:0005488-binding(L=1),
SESE_020081	OEL16115.1	50.6	AHM	DEAD-box ATP-dependent RNA helicase 28	ATP-dependent RNA helicase	DEAD/DEAH box helicase	ATP-dependent RNA helicase DDX27	Ribosome biogenesis,Spliceosome	GO:0008152-metabolic process(L=1),GO:0009987-cellular process(L=1),	NA	GO:0003824-catalytic activity(L=1),GO:0005488-binding(L=1),
SESE_032005	XP_006826893.1	45.6	AHM	DELLA protein GAI1	DELLA protein	GRAS domain family	DELLA protein	Plant hormone signal transduction	GO:0000003-reproduction(L=1),GO:0008152-metabolic process(L=1),GO:0009987-cellular process(L=1),GO:0023052-signaling(L=1),GO:0032501-multicellular organismal process(L=1),GO:0032502-developmental process(L=1),GO:0044699-single-organism process(L=1),GO:0050896-response to stimulus(L=1),GO:0051179-localization(L=1),GO:0065007-biological regulation(L=1),	GO:0005623-cell(L=1),GO:0043226-organelle(L=1),	GO:0001071-nucleic acid binding transcription factor activity(L=1),GO:0003824-catalytic activity(L=1),
SESE_041504	XP_027329642.1	42.6	AHM	dihydroflavonol 4-reductase-like	Dihydroflavonol4-reductase	NAD dependent epimerase/dehydratase family	anthocyanidin reductase	Flavonoid biosynthesis	GO:0008152-metabolic process(L=1),GO:0009987-cellular process(L=1),	GO:0005623-cell(L=1),GO:0016020-membrane(L=1),GO:0043226-organelle(L=1),	GO:0003824-catalytic activity(L=1),GO:0005488-binding(L=1),
SESE_018016	XP_006852826.1	64.8	AHM	F-box/LRR-repeat protein 14	F-box LRR-repeat protein	NA	F-box/LRR-repeat protein 14	NA	NA	NA	NA
SESE_037298	XP_031494653.1	52.6	AHM	G-box-binding factor 1	Transcription factor	G-box binding protein MFMR	plant G-box-binding factor	Transcription factors	GO:0008152-metabolic process(L=1),GO:0009987-cellular process(L=1),GO:0065007-biological regulation(L=1),	GO:0005623-cell(L=1),GO:0043226-organelle(L=1),	GO:0001071-nucleic acid binding transcription factor activity(L=1),GO:0005488-binding(L=1),
SESE_017377	XP_008783737.2	71.7	AHM	general transcription factor IIH subunit 2	general transcription factor IIH subunit	Ssl1-like	transcription initiation factor TFIIH	Basal transcription factors,Viral carcinogenesis,Nucleotide excision repair	GO:0008152-metabolic process(L=1),GO:0009987-cellular process(L=1),GO:0044699-single-organism process(L=1),GO:0050896-response to stimulus(L=1),GO:0065007-biological regulation(L=1),	GO:0005623-cell(L=1),GO:0031974-membrane-enclosed lumen(L=1),GO:0032991-macromolecular complex(L=1),GO:0043226-organelle(L=1),	GO:0005488-binding(L=1),
SESE_032290	XP_023553741.1	82.9	AHM	glycerate dehydrogenase isoform	Hydroxypyruvate reductase	D-isomer specific 2-hydroxyacid dehydrogenase, NAD binding domain	glycerate dehydrogenase	Glycine, serine and threonine metabolism,Microbial metabolism in diverse environments,Carbon metabolism	GO:0008152-metabolic process(L=1),GO:0009987-cellular process(L=1),GO:0044699-single-organism process(L=1),GO:0050896-response to stimulus(L=1),	GO:0005576-extracellular region(L=1),GO:0005623-cell(L=1),GO:0043226-organelle(L=1),	GO:0003824-catalytic activity(L=1),GO:0005488-binding(L=1),
SESE_085719	XP_024036086.1	75.9	AHM	glycine-rich domain-containing protein 1 isoform	Protein of unknown function (DUF1399)	Glycine-rich domain-containing protein-like	glycine-rich domain-containing protein 1	NA	NA	GO:0005623-cell(L=1),GO:0016020-membrane(L=1),	NA
SESE_004651	XP_020530621.1	59.8	AHM	GPI ethanolamine phosphate transferase	GPI ethanolamine phosphate transferase	Phosphatidylinositolglycan class N (PIG-N)	GPI ethanolamine phosphate transferase 1	Glycosylphosphatidylinositol (GPI)-anchor biosynthesis	GO:0008152-metabolic process(L=1),GO:0009987-cellular process(L=1),	GO:0005623-cell(L=1),GO:0016020-membrane(L=1),GO:0043226-organelle(L=1),	GO:0003824-catalytic activity(L=1),
SESE_099649	XP_020519800.1	68.7	AHM	haloacid dehalogenase-like hydrolase domain-containing protein Sgpp isoform	Haloacid dehalogenase-like hydrolase family protein	Haloacid dehalogenase-like hydrolase	haloacid dehalogenase-like hydrolase domain-containing protein Sgpp isoform		GO:0008152-metabolic process(L=1),	GO:0005623-cell(L=1),GO:0016020-membrane(L=1),	GO:0003824-catalytic activity(L=1),
SESE_030065	XP_006851770.2	65.6	AHM	homeobox-leucine zipper protein ANTHOCYANINLESS 2	homeobox-leucine zipper protein	START domain	homeobox-leucine zipper protein	Transcription factors	GO:0008152-metabolic process(L=1),GO:0009987-cellular process(L=1),GO:0032501-multicellular organismal process(L=1),GO:0032502-developmental process(L=1),GO:0044699-single-organism process(L=1),GO:0050896-response to stimulus(L=1),GO:0065007-biological regulation(L=1),	GO:0005623-cell(L=1),GO:0043226-organelle(L=1),	GO:0001071-nucleic acid binding transcription factor activity(L=1),GO:0005488-binding(L=1),
SESE_053543	KAG0576827.1	25	AHM	hypothetical protein KC19	NA	NA	MAGUK p55 subfamily member 5	Hippo signaling pathway	NA	NA	NA
SESE_111734	XP_021969614.1	56.3	AHM	late embryogenesis abundant protein D-34	late embryogenesis abundant protein	Seed maturation protein	late embryogenesis abundant protein D-34-like	NA	NA	NA	NA
SESE_085538	XP_002307051.3	32.4	AHM	lipase-like PAD4	Lipase (class 3)	Enhanced disease susceptibility 1 protein EP domain	lipase-like PAD4	NA	GO:0002376-immune system process(L=1),GO:0008152-metabolic process(L=1),GO:0009987-cellular process(L=1),GO:0023052-signaling(L=1),GO:0032501-multicellular organismal process(L=1),GO:0032502-developmental process(L=1),GO:0044699-single-organism process(L=1),GO:0050896-response to stimulus(L=1),GO:0051704-multi-organism process(L=1),GO:0065007-biological regulation(L=1),	GO:0005623-cell(L=1),GO:0043226-organelle(L=1),	GO:0003824-catalytic activity(L=1),
SESE_052680	XP_028101022.1	37	AHM	LRR receptor-like serine/threonine-protein kinase FLS2	LRR receptor-like serine threonine-protein kinase	Leucine rich repeat	LRR receptor-like serine/threonine-protein kinase	MAPK signaling pathway	GO:0008152-metabolic process(L=1),GO:0009987-cellular process(L=1),	GO:0016020-membrane(L=1),	GO:0003824-catalytic activity(L=1),GO:0005488-binding(L=1),
SESE_076253	XP_006486395.1	47.4	AHM	L-type lectin-domain containing receptor kinase	Legume lectin domain	Legume lectin domain	L-type lectin-domain containing receptor kinase IV.1		GO:0008152-metabolic process(L=1),GO:0009987-cellular process(L=1),GO:0023052-signaling(L=1),GO:0044699-single-organism process(L=1),GO:0050896-response to stimulus(L=1),GO:0065007-biological regulation(L=1),	GO:0005623-cell(L=1),GO:0016020-membrane(L=1),GO:0043226-organelle(L=1),	GO:0003824-catalytic activity(L=1),GO:0004871-signal transducer activity(L=1),GO:0005488-binding(L=1),GO:0060089-molecular transducer activity(L=1),
SESE_015793	XP_026448105.1	63.3	AHM	mediator of RNA polymerase II transcription	mediator of RNA polymerase II transcription subunit 11	Mediator complex protein	mediator of RNA polymerase II transcription	Transcription machinery	GO:0008152-metabolic process(L=1),GO:0009987-cellular process(L=1),GO:0065007-biological regulation(L=1),	GO:0005623-cell(L=1),GO:0031974-membrane-enclosed lumen(L=1),GO:0032991-macromolecular complex(L=1),GO:0043226-organelle(L=1),	GO:0000988-transcription factor activity, protein binding(L=1),
SESE_027642	XP_023926905.1	83.6	AHM	mitogen-activated protein kinase	Mitogen-activated protein kinase	Protein kinase domain	mitogen-activated protein kinase 4	MAPK signaling pathway	GO:0000003-reproduction(L=1),GO:0002376-immune system process(L=1),GO:0008152-metabolic process(L=1),GO:0009987-cellular process(L=1),GO:0023052-signaling(L=1),GO:0032501-multicellular organismal process(L=1),GO:0032502-developmental process(L=1),GO:0044699-single-organism process(L=1),GO:0050896-response to stimulus(L=1),GO:0051704-multi-organism process(L=1),GO:0065007-biological regulation(L=1…	GO:0005623-cell(L=1),GO:0032991-macromolecular complex(L=1),GO:0043226-organelle(L=1),	GO:0003824-catalytic activity(L=1),GO:0004871-signal transducer activity(L=1),GO:0005488-binding(L=1),GO:0060089-molecular transducer activity(L=1),
SESE_066024	AEH25775.1	54	AHM	MYB-like protein	myb-like DNA-binding domain containing protein	Myb-like DNA-binding domain	transcription factor MYB	Transcription factors	GO:0008152-metabolic process(L=1),GO:0009987-cellular process(L=1),GO:0050896-response to stimulus(L=1),GO:0065007-biological regulation(L=1),	GO:0005623-cell(L=1),GO:0043226-organelle(L=1),	GO:0001071-nucleic acid binding transcription factor activity(L=1),GO:0005488-binding(L=1),
SESE_071431	XP_008788172.1	30.9	AHM	myosin-binding protein 3-like	NA	Zein-binding	myosin-binding protein 3-like	NA	GO:0009987-cellular process(L=1),GO:0044699-single-organism process(L=1),GO:0051179-localization(L=1),GO:0065007-biological regulation(L=1),	GO:0005623-cell(L=1),GO:0016020-membrane(L=1),GO:0032991-macromolecular complex(L=1),	GO:0005215-transporter activity(L=1),
SESE_013024	XP_006445884.1	73	AHM	notchless protein	notchless protein	WD domain, G-beta repeat	ribosome assembly protein 4	Ribosome biogenesis	GO:0071840-cellular component organization or biogenesis(L=1),	GO:0005623-cell(L=1),GO:0031974-membrane-enclosed lumen(L=1),GO:0032991-macromolecular complex(L=1),GO:0043226-organelle(L=1),
SESE_094426	AQX43135.1	82.9	AHM	NPF family transporter	NA	POT family	solute carrier family 15 (peptide/histidine transporter)	Transporters	NA	NA	NA
SESE_079497	XP_023541824.1	72.8	AHM	nucleobase-ascorbate transporter 2	nucleobase-ascorbate transporter	Permease family	nucleobase-ascorbate transporter 2	NA	GO:0009987-cellular process(L=1),GO:0044699-single-organism process(L=1),GO:0051179-localization(L=1),	GO:0016020-membrane(L=1),	GO:0005215-transporter activity(L=1),
SESE_082391	XP_010256135.1	30	AHM	pentatricopeptide repeat-containing protein At3g22670, mitochondrial isoform	pentatricopeptide repeat-containing protein At3g22670	PPR repeat family	pentatricopeptide repeat-containing protein At1g52640, mitochondrial		GO:0008152-metabolic process(L=1),GO:0009987-cellular process(L=1),	GO:0005623-cell(L=1),GO:0043226-organelle(L=1),	GO:0003824-catalytic activity(L=1),GO:0005488-binding(L=1),
SESE_007455	XP_002501904.1	35.5	AHM	predicted protein	Alpha beta hydrolase fold protein	alpha/beta hydrolase fold	epoxide hydrolase 4	Hydrolases	GO:0008152-metabolic process(L=1),		GO:0003824-catalytic activity(L=1),
SESE_050983	XP_006852821.1	62.1	AHM	probable sodium-coupled neutral amino acid transporter	amino acid transporter	Transmembrane amino acid transporter protein	probable sodium-coupled neutral amino acid transporter 6	NA	GO:0009987-cellular process(L=1),GO:0044699-single-organism process(L=1),GO:0051179-localization(L=1),	GO:0016020-membrane(L=1),	GO:0005215-transporter activity(L=1),
SESE_029440	XP_006416659.1	69.9	AHM	probable zinc metallopeptidase EGY3,chloroplastic	Inherit from COG: Membrane-associated zinc metalloprotease		probable zinc metallopeptidase EGY3, chloroplastic	NA	GO:0008152-metabolic process(L=1),GO:0050896-response to stimulus(L=1),		GO:0003824-catalytic activity(L=1),
SESE_096324	XP_009420477.1	64.1	AHM	protease Do-like 10, mitochondrial	Protease Do-like 10	Trypsin-like peptidase domain	protease Do-like 10, mitochondrial	NA	GO:0008152-metabolic process(L=1),	GO:0005623-cell(L=1),GO:0016020-membrane(L=1),GO:0031974-membrane-enclosed lumen(L=1),GO:0043226-organelle(L=1),	GO:0003824-catalytic activity(L=1),
SESE_115496	XP_028101795.1	60.6	AHM	protein DETOXIFICATION 29-like	protein TRANSPARENT TESTA 12-like	MatE	multidrug resistance protein, MATE family	Transporters	GO:0009987-cellular process(L=1),GO:0044699-single-organism process(L=1),GO:0050896-response to stimulus(L=1),GO:0051179-localization(L=1),GO:0051704-multi-organism process(L=1),	GO:0005623-cell(L=1),GO:0016020-membrane(L=1),GO:0043226-organelle(L=1),	GO:0005215-transporter activity(L=1),
SESE_029770	XP_023549952.1	45.7	AHM	protein HOTHEAD	glucose-methanol-choline (GMC) oxidoreductase family protein	GMC oxidoreductase	protein HOTHEAD-like	Glycine, serine and threonine metabolism	GO:0008152-metabolic process(L=1),		GO:0003824-catalytic activity(L=1),GO:0005488-binding(L=1),
SESE_111042	XP_023533080.1	65.3	AHM	protein NRT1/ PTR FAMILY 7.3-like isoform	Nitrate transporter	POT family	solute carrier family 15 (peptide/histidine transporter)	Transporters	GO:0009987-cellular process(L=1),GO:0044699-single-organism process(L=1),GO:0050896-response to stimulus(L=1),GO:0051179-localization(L=1),	GO:0005623-cell(L=1),GO:0016020-membrane(L=1),	GO:0005215-transporter activity(L=1),
SESE_039525	XP_006422534.1	75.8	AHM	protein phosphatase 2C	phosphatase 2C	Protein phosphatase 2C	probable protein phosphatase 2C 60	Protein phosphatases and associated proteins	GO:0008152-metabolic process(L=1),GO:0009987-cellular process(L=1),	GO:0005623-cell(L=1),GO:0016020-membrane(L=1),	GO:0003824-catalytic activity(L=1),GO:0005488-binding(L=1),
SESE_026090	AAM28917.1	45	AHM	putative TIR/NBS/LRR disease resistance protein	resistance protein	TIR domain	disease resistance protein	NA	GO:0008152-metabolic process(L=1),GO:0009987-cellular process(L=1),GO:0023052-signaling(L=1),GO:0044699-single-organism process(L=1),GO:0050896-response to stimulus(L=1),GO:0065007-biological regulation(L=1),		GO:0003824-catalytic activity(L=1),GO:0005488-binding(L=1),
SESE_037263	ADW94527.1	39.5	AHM	putative TIR-NBS-LRR protein	resistance protein	NB-ARC domain	disease resistance protein TAO1 isoform	NA	GO:0008152-metabolic process(L=1),GO:0009987-cellular process(L=1),GO:0023052-signaling(L=1),GO:0044699-single-organism process(L=1),GO:0050896-response to stimulus(L=1),GO:0065007-biological regulation(L=1),		GO:0003824-catalytic activity(L=1),GO:0005488-binding(L=1),
SESE_102440	QEH91620.1	40.2	AHM	putative TIR-NBS-LRR protein	resistance protein	NB-ARC domain	disease resistance protein TAO1-like	NA	GO:0008152-metabolic process(L=1),GO:0009987-cellular process(L=1),GO:0023052-signaling(L=1),GO:0044699-single-organism process(L=1),GO:0050896-response to stimulus(L=1),GO:0065007-biological regulation(L=1),		GO:0003824-catalytic activity(L=1),GO:0005488-binding(L=1),
SESE_107044	QEH91620.1	29.3	AHM	putative TIR-NBS-LRR protein	resistance protein	NB-ARC domain	disease resistance protein TAO1	NA	GO:0008152-metabolic process(L=1),GO:0009987-cellular process(L=1),GO:0023052-signaling(L=1),GO:0044699-single-organism process(L=1),GO:0050896-response to stimulus(L=1),GO:0065007-biological regulation(L=1),		GO:0003824-catalytic activity(L=1),GO:0005488-binding(L=1),
SESE_003989	XP_023544353.1	80.1	AHM	pyrophosphate-fructose 6-phosphate 1-phosphotransferase	pyrophosphate--fructose 6-phosphate 1-phosphotransferase	Phosphofructokinase	diphosphate-dependent phosphofructokinase	Glycolysis / Gluconeogenesis	GO:0000003-reproduction(L=1),GO:0008152-metabolic process(L=1),GO:0009987-cellular process(L=1),GO:0032501-multicellular organismal process(L=1),GO:0032502-developmental process(L=1),GO:0044699-single-organism process(L=1),GO:0050896-response to stimulus(L=1),	GO:0005623-cell(L=1),GO:0016020-membrane(L=1),GO:0032991-macromolecular complex(L=1),	GO:0003824-catalytic activity(L=1),GO:0005488-binding(L=1),
SESE_027373	XP_024387936.1	61.5	AHM	repressor of RNA polymerase III transcription MAF1	Repressor of RNA polymerase III transcription MAF1	Maf1 regulator	repressor of RNA polymerase III transcription MAF1	NA	GO:0065007-biological regulation(L=1),	GO:0005623-cell(L=1),GO:0043226-organelle(L=1),	NA
SESE_113383	TFH84699.1	45.4	AHM	retroviral-like aspartic protease	Legume lectin domain	Legume lectin domain	L-type lectin-domain containing receptor kinase	NA	GO:0008152-metabolic process(L=1),GO:0009987-cellular process(L=1),	GO:0005623-cell(L=1),GO:0016020-membrane(L=1),	GO:0003824-catalytic activity(L=1),GO:0005488-binding(L=1),
SESE_083263	WP_156113310.1	63	AHM	reverse transcriptase-like protein	NA	Reverse transcriptase-like	uncharacterized protein	NA	NA	NA	NA
SESE_120175	YP_009233161.1	89	AHM	ribulose-1,5-bisphosphate carboxylase/oxygenase	NA	Ribulose bisphosphate carboxylase large chain, catalytic domain		NA	NA	NA	NA
SESE_108247	XP_023891279.1	55.5	AHM	secoisolariciresinol dehydrogenase	momilactone A synthase-like	Enoyl-(Acyl carrier protein) reductase	secoisolariciresinol dehydrogenase-like isoform	NA	GO:0008152-metabolic process(L=1),	NA	GO:0003824-catalytic activity(L=1),
SESE_085061	XP_010277102.1	68.9	AHM	somatic embryogenesis receptor kinase 1-like	NA	Leucine Rich repeats (2 copies)	somatic embryogenesis receptor kinase 1-like	NA	NA	NA	NA
SESE_072458	XP_008779090.1	72.6	AHM	superoxide dismutase [Cu-Zn],chloroplastic	Destroys radicals which are normally produced within the cells and which are toxic to biological systems (By similarity)	Copper/zinc superoxide dismutase (SODC)	superoxide dismutase, Cu-Zn family,Prion disease,Huntington disease,Pathways of neurodegeneration - multiple diseases	Peroxisome,Longevity regulating pathway	GO:0008152-metabolic process(L=1),GO:0009987-cellular process(L=1),GO:0044699-single-organism process(L=1),GO:0050896-response to stimulus(L=1),GO:0065007-biological regulation(L=1),	GO:0005576-extracellular region(L=1),GO:0005623-cell(L=1),GO:0043226-organelle(L=1),	GO:0003824-catalytic activity(L=1),GO:0005488-binding(L=1),GO:0016209-antioxidant activity(L=1),
SESE_031841	TBA00021934	27.3	AHM	TBA00021934	GRF zinc finger	Zinc knuckle	replication factor A1	DNA replication	NA	NA	GO:0005488-binding(L=1),
SESE_085364	QHZ00914.1	83.6	AHM	terpene synthase 11	NA	Terpene synthase family, metal binding domain	longifolene/alpha-longipinene synthase	Sesquiterpenoid and triterpenoid biosynthesis	NA	NA	NA
SESE_107814	XP_039164771.1	28	AHM	TMV resistance protein N-like isoform X4	resistance protein	NB-ARC domain	TMV resistance protein N isoform	NA	GO:0008152-metabolic process(L=1),GO:0009987-cellular process(L=1),GO:0023052-signaling(L=1),GO:0044699-single-organism process(L=1),GO:0050896-response to stimulus(L=1),GO:0065007-biological regulation(L=1),	NA	GO:0003824-catalytic activity(L=1),GO:0005488-binding(L=1),
SESE_037770	XP_006855163.1	78.1	AHM	topless-related protein 1	NA	WD domain, G-beta repeat	topless-related protein 1	NA	NA	NA	NA
SESE_029842	XP_020682558.1	33.9	AHM	transcription factor IBH1-like 1	NA	NA	transcription factor IBH1-like 1	NA	NA	NA	NA
SESE_103346	XP_023898837.1	69.2	AHM	transmembrane protein	transmembrane protein 120	TMPIT-like protein	transmembrane protein 120	NA	NA	GO:0016020-membrane(L=1),	NA
SESE_120402	BBH05290.1	46.5	AHM	transposable element gene	NA	GDSL-like Lipase/Acylhydrolase	adenylate cyclase	Purine metabolism,Longevity regulating pathway	NA	NA	NA
SESE_027237	XP_007220262.2	37.9	AHM	U-box domain-containing protein	U-box domain-containing protein	Protein kinase domain	U-box domain-containing protein 33	NA	GO:0008152-metabolic process(L=1),GO:0009987-cellular process(L=1),GO:0050896-response to stimulus(L=1),	GO:0005623-cell(L=1),GO:0032991-macromolecular complex(L=1),	GO:0003824-catalytic activity(L=1),GO:0005488-binding(L=1),
SESE_015860	XP_024357444.1	66.1	AHM	uncharacterized protein	Uncharacterised BCR, YnfA/UPF0060 family	Uncharacterised BCR, YnfA/UPF0060 family	small multidrug resistance family-3 protein	Transporters	NA	GO:0016020-membrane(L=1),	NA
SESE_028821	XP_018481121.1	39.1	AHM	uncharacterized protein	expressed protein	Protein of unknown function (DUF1645)	uncharacterized protein	NA	NA	NA	NA
SESE_029899	WP_044909216.1	50.8	AHM	uncharacterized protein	NA	NA	legumain	Lysosome	NA	NA	NA
SESE_030384	XP_022866138.1	33.5	AHM	uncharacterized protein	NA	NA	uncharacterized protein	NA	NA	NA	NA
SESE_068456	XP_031488436.1	49.2	AHM	uncharacterized protein	PAR1 protein	PAR1 protein	uncharacterized	NA	NA	NA	NA
SESE_085834	XP_025699805.1	50.5	AHM	uncharacterized protein	Plant protein of unknown function (DUF946)	Vacuolar protein sorting-associated protein 62	uncharacterized protein	NA	NA	NA	NA
SESE_118440	XP_017423273.1	46.8	AHM	uncharacterized protein	NA	gag-polypeptide of LTR copia-type	uncharacterized protein	NA	NA	NA	NA
SESE_112045	ABK23880.1	84.4	AHM	unknown	DNA-binding protein that specifically recognizes a negative element (S1F) within the RPS1 promoter (By similarity)	DNA binding protein S1FA	GC-rich sequence DNA-binding factor 2 isoform	Transcription factors	GO:0008152-metabolic process(L=1),GO:0009987-cellular process(L=1),GO:0065007-biological regulation(L=1),	GO:0005623-cell(L=1),GO:0043226-organelle(L=1),	GO:0005488-binding(L=1),
SESE_027814	XP_019702179.1	60	AHM	WAT1-related protein At5g07050-like	auxin-induced protein	EamA-like transporter family	WAT1-related protein	NA	NA	GO:0016020-membrane(L=1),	NA
SESE_026109	XP_023517428.1	52.8	CMD	ABC transporter B family member 15-like isoform	ABC transporter	ABC transporter	ATP-binding cassette, subfamily B (MDR/TAP)	ABC transporters	GO:0002376-immune system process(L=1),GO:0008152-metabolic process(L=1),GO:0009987-cellular process(L=1),GO:0023052-signaling(L=1),GO:0032501-multicellular organismal process(L=1),GO:0032502-developmental process(L=1),GO:0044699-single-organism process(L=1),GO:0050896-response to stimulus(L=1),GO:0051704-multi-organism process(L=1),GO:0065007-biological regulation(L=1),	GO:0005623-cell(L=1),GO:0043226-organelle(L=1),	GO:0003824-catalytic activity(L=1),
SESE_098354	XP_031263041.1	52.8	CMD	abietadienol/abietadienal oxidase	abietadienol abietadienal	Cytochrome P450	abietadienol/abietadienal oxidase	Diterpenoid biosynthesis	GO:0008152-metabolic process(L=1),GO:0050896-response to stimulus(L=1),	GO:0005623-cell(L=1),	GO:0003824-catalytic activity(L=1),GO:0005488-binding(L=1),
SESE_028622	XP_010261604.1	74.9	CMD	ATPase family AAA domain-containing protein	ATPase family AAA domain-containing protein	Domain of unknown function (DUF3523)	ATPase family AAA domain-containing protein	Mitochondrial biogenesis	GO:0008152-metabolic process(L=1),	NA	GO:0003824-catalytic activity(L=1),
SESE_083869	XP_004299992.1	32.6	CMD	bark storage protein	bark storage protein A-like	Phosphorylase superfamily	bark storage protein A	NA	NA	NA	NA
SESE_030382	XP_008782619.2	76.1	CMD	cationic peroxidase 1-like	peroxidase	Peroxidase	peroxidase	Phenylpropanoid biosynthesis	NA	NA	NA
SESE_058034	XP_008800494.1	44.4	CMD	cysteine-rich receptor-like protein kinase 6 isoform	Cysteine-rich receptor-like protein kinase	Protein tyrosine kinase	cysteine-rich receptor-like protein kinase 10	NA	GO:0065007-biological regulation(L=1),	GO:0005623-cell(L=1),GO:0043226-organelle(L=1),	GO:0001071-nucleic acid binding transcription factor activity(L=1),GO:0005488-binding(L=1),
SESE_067476	XP_006851423.1	49.9	CMD	cytochrome P450	NA	Cytochrome P450	cytochrome P450 family 89	NA	GO:0008152-metabolic process(L=1),GO:0009987-cellular process(L=1),GO:0023052-signaling(L=1),GO:0044699-single-organism process(L=1),GO:0050896-response to stimulus(L=1),GO:0065007-biological regulation(L=1),	NA	GO:0003824-catalytic activity(L=1),GO:0005488-binding(L=1),
SESE_031495	XP_022552315.1	55	CMD	DNA replication licensing factor MCM6-like	NA	MCM P-loop domain	DNA replication licensing factor MCM6	DNA replication, Meiosis	GO:0008152-metabolic process(L=1),GO:0009987-cellular process(L=1),GO:0044699-single-organism process(L=1),GO:0050896-response to stimulus(L=1),	GO:0005576-extracellular region(L=1),GO:0005623-cell(L=1),	GO:0003824-catalytic activity(L=1),GO:0005488-binding(L=1),GO:0016209-antioxidant activity(L=1),
SESE_048862	XP_022761141.1	36.8	CMD	ethylene-responsive transcription factor	AP2 ERF domain-containing transcription factor source	AP2 domain	pathogenesis-related genes transcriptional activator	Plant-pathogen interaction	NA	NA	NA
SESE_106757	XP_019451476.1	27.46	CMD	F-box/FBD/LRR-repeat protein	NA	F-box domain	F-box/FBD/LRR-repeat protein	Ubiquitin system	GO:0002376-immune system process(L=1),GO:0008152-metabolic process(L=1),GO:0009987-cellular process(L=1),GO:0044699-single-organism process(L=1),GO:0050896-response to stimulus(L=1),GO:0051179-localization(L=1),GO:0051704-multi-organism process(L=1),	GO:0005623-cell(L=1),GO:0016020-membrane(L=1),GO:0043226-organelle(L=1),	GO:0003824-catalytic activity(L=1),GO:0005215-transporter activity(L=1),GO:0005488-binding(L=1),
SESE_147247	XP_006465451.1	38.5	CMD	F-box/kelch-repeat protein	F-box kelch-repeat protein	Kelch motif	F-box/kelch-repeat protein At1g80440-like	NA	GO:0000003-reproduction(L=1),GO:0008152-metabolic process(L=1),GO:0009987-cellular process(L=1),GO:0032501-multicellular organismal process(L=1),GO:0032502-developmental process(L=1),GO:0044699-single-organism process(L=1),GO:0050896-response to stimulus(L=1),GO:0051179-localization(L=1),GO:0051704-multi-organism process(L=1),GO:0065007-biological regulation(L=1),	GO:0005623-cell(L=1),GO:0016020-membrane(L=1),GO:0043226-organelle(L=1),	GO:0003824-catalytic activity(L=1),GO:0005488-binding(L=1),
SESE_097243	XP_009416303.1	60.5	CMD	ferritin-4, chloroplastic-like isoform	NA	Ferritin-like domain	ferritin heavy chain	Ferroptosis,Necroptosis,Mineral absorption	GO:0008152-metabolic process(L=1),GO:0009987-cellular process(L=1),	NA	GO:0003824-catalytic activity(L=1),GO:0005488-binding(L=1),
SESE_102258	XP_009416303.1	69.7	CMD	ferritin-4, chloroplastic-like isoform	Stores iron in a soluble, non-toxic, readily available form. Important for iron homeostasis (By similarity)	Ferritin-like domain	ferritin heavy chain	Ferroptosis,Necroptosis,Mineral absorption	GO:0008152-metabolic process(L=1),GO:0009987-cellular process(L=1),	NA	GO:0003824-catalytic activity(L=1),
SESE_089222	XP_020891214.1	74.1	CMD	galactinol synthase 4	galactinol synthase	Glycosyl transferase family 8	inositol 3-alpha-galactosyltransferase	Galactose metabolism	GO:0008152-metabolic process(L=1),GO:0009987-cellular process(L=1),GO:0065007-biological regulation(L=1),	GO:0005623-cell(L=1),GO:0043226-organelle(L=1),	GO:0001071-nucleic acid binding transcription factor activity(L=1),GO:0005488-binding(L=1),
SESE_042059	XP_024043408.1	36.23	CMD	LEAF RUST 10 DISEASE-RESISTANCE LOCUS RECEPTOR-LIKE PROTEIN KINASE-like	serine threonine-protein kinase	Protein kinase domain	LEAF RUST 10 DISEASE-RESISTANCE LOCUS RECEPTOR-LIKE PROTEIN KINASE-like		NA	NA	NA
SESE_026200	XP_021692357.1	36.4	CMD	leucine-rich repeat receptor protein kinase EMS1-like [Hevea brasiliensis]	leucine rich repeat	Leucine rich repeat	LRR receptor-like serine/threonine-protein kinase FLS2		GO:0008152-metabolic process(L=1),GO:0009987-cellular process(L=1),		GO:0003824-catalytic activity(L=1),GO:0005488-binding(L=1),
SESE_034033	XP_015894870.1	39.6	CMD	linamarin synthase 1	UDP-Glycosyltransferase	UDP-glucoronosyl and UDP-glucosyl transferase	UDP-Glycosyltransferase superfamily protein	Zeatin biosynthesis	GO:0000003-reproduction(L=1),GO:0009987-cellular process(L=1),GO:0032501-multicellular organismal process(L=1),GO:0032502-developmental process(L=1),GO:0044699-single-organism process(L=1),	GO:0005623-cell(L=1),GO:0043226-organelle(L=1),	NA
SESE_085538	XP_002307051.3	32.4	CMD	lipase-like PAD4	Lipase (class 3)	Enhanced disease susceptibility 1 protein EP domain	lipase-like PAD4	NA	GO:0008152-metabolic process(L=1),	GO:0005623-cell(L=1),GO:0043226-organelle(L=1),	GO:0003824-catalytic activity(L=1),GO:0005488-binding(L=1),
SESE_027642	XP_023926905.1	83.6	CMD	mitogen-activated protein kinase	Mitogen-activated protein kinase	Protein kinase domain	mitogen-activated protein kinase 4	MAPK signaling pathway,Plant-pathogen interaction	NA	NA	NA
SESE_014841	NA	NA	CMD	NA	NA	NA	SWI/SNF-related matrix-associated actin-dependent regulator of chromatin subfamily A member 3-like	Ubiquitin system	GO:0008152-metabolic process(L=1),GO:0009987-cellular process(L=1),GO:0044699-single-organism process(L=1),GO:0050896-response to stimulus(L=1),GO:0065007-biological regulation(L=1),	GO:0005623-cell(L=1),GO:0043226-organelle(L=1),	GO:0005488-binding(L=1),
SESE_096943	XP_006851210.1	87.6	CMD	NAD(P)H dehydrogenase (quinone) FQR1-like	NA	NADPH-dependent FMN reductase	NAD(P)H dehydrogenase (quinone)	Ubiquinone and other terpenoid-quinone biosynthesis	NA	NA	NA
SESE_068947	XP_010268217.1	69.4	CMD	naringenin,2-oxoglutarate 3-dioxygenase-like	NA	2OG-Fe(II) oxygenase superfamily	naringenin 3-dioxygenase	Flavonoid biosynthesis, Biosynthesis of secondary metabolites	NA	NA	NA
SESE_023967	XP_008808800.1	75	CMD	phytochrome-interacting ankyrin-repeat protein 2-like	Ankyrin repeat-containing protein	Ankyrin repeats (3 copies)	phytochrome-interacting ankyrin-repeat protein 2-like isoform		GO:0008152-metabolic process(L=1),GO:0009987-cellular process(L=1),	GO:0005623-cell(L=1),GO:0043226-organelle(L=1),	GO:0003824-catalytic activity(L=1),
SESE_079019	XP_009409272.1	25.8	CMD	protein ACCELERATED CELL DEATH 6-like	Ankyrin repeat-containing protein	Ankyrin repeats (3 copies)	protein ACCELERATED CELL DEATH 6-like	NA	NA	NA	NA
SESE_093142	XP_011628344.1	56.9	CMD	protein phosphatase inhibitor 2	protein phosphatase inhibitor 2 containing protein, expressed	Protein phosphatase inhibitor 2 (IPP-2)	protein phosphatase inhibitor 2	Phosphoprotein phosphatases	GO:0008152-metabolic process(L=1),GO:0009987-cellular process(L=1),GO:0044699-single-organism process(L=1),	GO:0005623-cell(L=1),GO:0016020-membrane(L=1),GO:0032991-macromolecular complex(L=1),GO:0043226-organelle(L=1),	GO:0003824-catalytic activity(L=1),GO:0005488-binding(L=1),
SESE_013208	XP_028799849.1	38.46	CMD	putative disease resistance protein	NA	Leucine rich repeat	putative disease resistance protein RGA4	NA	GO:0051704-multi-organism process(L=1),	NA	NA
SESE_121765	XP_009384814.1	60.3	CMD	putative respiratory burst oxidase	respiratory burst oxidase	Ferric reductase NAD binding domain	respiratory burst oxidase	MAPK signaling pathway	NA	NA	NA
SESE_144377	XP_023732137.1	35.8	CMD	ranscription termination factor MTERF9, chloroplastic isoform	mitochondrial transcription termination factor family protein	mTERF	mTERF domain-containing protein	Mitochondrial biogenesis	GO:0008152-metabolic process(L=1),	NA	GO:0003824-catalytic activity(L=1),GO:0005488-binding(L=1),GO:0009055-electron carrier activity(L=1),
SESE_105796	XP_031486608.1	40.8	CMD	receptor kinase-like protein Xa21 isoform	STYKc	Leucine rich repeat	LRR receptor-like serine/threonine-protein kinase	MAPK signaling pathway	GO:0000003-reproduction(L=1),GO:0002376-immune system process(L=1),GO:0008152-metabolic process(L=1),GO:0009987-cellular process(L=1),GO:0023052-signaling(L=1),GO:0032501-multicellular organismal process(L=1),GO:0032502-developmental process(L=1),GO:0044699-single-organism process(L=1),GO:0050896-response to stimulus(L=1),GO:0051704-multi-organism process(L=1),GO:0065007-biological regulation(L=1…	GO:0005623-cell(L=1),GO:0032991-macromolecular complex(L=1),GO:0043226-organelle(L=1),	GO:0003824-catalytic activity(L=1),GO:0004871-signal transducer activity(L=1),GO:0005488-binding(L=1),GO:0060089-molecular transducer activity(L=1),
SESE_008056	XP_031480943.1	57.1	CMD	replication protein	Replication protein A	Replication protein A C terminal	replication factor A2	DNA replication,Fanconi anemia pathway	NA	NA	NA
SESE_029346	XP_022722688.1	83	CMD	serine/threonine-protein kinase	serine threonine-protein kinase HT1-like	Protein tyrosine kinase	serine/threonine-protein kinase	NA	NA	NA	NA
SESE_113916	XP_026435369.1	72.4	CMD	SWI/SNF complex component SNF12	NA	SWIB/MDM2 domain	SWI/SNF-related matrix-associated actin-dependent regulator of chromatin	Thermogenesis	GO:0008152-metabolic process(L=1),GO:0009987-cellular process(L=1),GO:0032501-multicellular organismal process(L=1),GO:0032502-developmental process(L=1),GO:0044699-single-organism process(L=1),GO:0050896-response to stimulus(L=1),GO:0065007-biological regulation(L=1),GO:0071840-cellular component organization or biogenesis(L=1),	GO:0005623-cell(L=1),GO:0043226-organelle(L=1),	NA
SESE_102523	QHZ00923.1	77.7	CMD	terpene synthase	NA	Terpene synthase family, metal binding domain	myrcene/ocimene synthase	Monoterpenoid biosynthesis	GO:0008152-metabolic process(L=1),	NA	GO:0003824-catalytic activity(L=1),
SESE_093798	XP_039131149.1	77.4	CMD	threonine dehydratase 1 biosynthetic, chloroplastic	NA	Pyridoxal-phosphate dependent enzyme	threonine dehydratase	Glycine, serine and threonine metabolism,Valine, leucine and isoleucine biosynthesis,Carbon metabolism	NA	NA	NA
SESE_093462	ADW94527.1	35.3	CMD	TIR-NBS-LRR protein	resistance protein	NB-ARC domain	isease resistance protein RPV1-like	NA	NA	GO:0005623-cell(L=1),GO:0031974-membrane-enclosed lumen(L=1),GO:0043226-organelle(L=1),	NA
SESE_102440	QEH91620.1	40.2	CMD	TIR-NBS-LRR protein	resistance protein	NB-ARC domain	disease resistance protein TAO1	NA	GO:0008152-metabolic process(L=1),GO:0009987-cellular process(L=1),GO:0023052-signaling(L=1),GO:0044699-single-organism process(L=1),GO:0050896-response to stimulus(L=1),GO:0065007-biological regulation(L=1),	NA	GO:0003824-catalytic activity(L=1),GO:0005488-binding(L=1),
SESE_056104	XP_040376418.1	84.5	CMD	transcription factor HY5-like	transcription factor	bZIP transcription factor	transcription factor HY5	Circadian rhythm	NA	NA	NA
SESE_074982	ASU44000.1	50.7	CMD	UDP-glycosyltransferase UGT7 [Picea glauca]	NA	UDP-glucoronosyl and UDP-glucosyl transferase	hydroquinone glucosyltransferase	Glycosyltransferases	GO:0008152-metabolic process(L=1),GO:0009987-cellular process(L=1),GO:0023052-signaling(L=1),GO:0044699-single-organism process(L=1),GO:0050896-response to stimulus(L=1),GO:0051179-localization(L=1),GO:0065007-biological regulation(L=1),	GO:0005623-cell(L=1),GO:0016020-membrane(L=1),	GO:0003824-catalytic activity(L=1),GO:0005215-transporter activity(L=1),GO:0005488-binding(L=1),
SESE_038740	XP_031481950.1	37.7	CMD	uncharacterized protein	expressed protein	Protein of unknown function (DUF1262)	uncharacterized protein	NA	GO:0008152-metabolic process(L=1),	GO:0005623-cell(L=1),GO:0043226-organelle(L=1),	GO:0003824-catalytic activity(L=1),GO:0016209-antioxidant activity(L=1),
SESE_122154	XP_031120957.1	69.1	CMD	uncharacterized protein	Redoxin	AhpC/TSA family	uncharacterized protein	NA	GO:0065007-biological regulation(L=1),	NA	NA
SESE_027078	CAE1144201.1	34.6	CMD	unnamed protein product	NA	NA	epidermal growth factor receptor substrate 15	Endocytosis	GO:0008152-metabolic process(L=1),	GO:0016020-membrane(L=1),	GO:0003824-catalytic activity(L=1),GO:0005488-binding(L=1),GO:0016209-antioxidant activity(L=1),
SESE_120078	XP_006429108.1	60.4	CMD	UPF0161 protein	UPF0161 protein	Putative membrane protein insertion efficiency factor	uncharacterized protein	NA	NA	NA	NA
SESE_024810	XP_031501975.1	65.9	CMD	WD repeat-containing protein	WD repeat-containing protein	WD domain, G-beta repeat	U3 small nucleolar RNA-associated protein 12	Ribosome biogenesis in eukaryotes	NA	NA	NA
SESE_022842	XP_022027445.1	66.4	MAP	1-(5-phosphoribosyl)-5-[(5-phosphoribosylamino)methylideneamino] imidazole-4-carboxamide isomerase,chloroplastic	1-(5-phosphoribosyl)-5- (5-phosphoribosylamino)methylideneamino imidazole-4-carboxamide isomerase	Histidine biosynthesis protein	phosphoribosylformimino-5-aminoimidazole carboxamide ribotide isomerase	Histidine metabolism,Biosynthesis of secondary metabolites	GO:0008152-metabolic process(L=1),GO:0009987-cellular process(L=1),GO:0023052-signaling(L=1),GO:0044699-single-organism process(L=1),GO:0050896-response to stimulus(L=1),GO:0051704-multi-organism process(L=1),GO:0065007-biological regulation(L=1),	GO:0005623-cell(L=1),GO:0016020-membrane(L=1),GO:0043226-organelle(L=1),	GO:0003824-catalytic activity(L=1),GO:0005488-binding(L=1),
SESE_025033	XP_031473434.1	62.4	MAP	2-oxoisovalerate dehydrogenase subunit alpha 2,mitochondrial,Propanoate metabolism	2-oxoisovalerate dehydrogenase subunit alpha	Dehydrogenase E1 component	2-oxoisovalerate dehydrogenase	Valine, leucine and isoleucine degradation,Propanoate metabolism, Biosynthesis of secondary metabolites	GO:0008152-metabolic process(L=1),GO:0009987-cellular process(L=1),	GO:0005623-cell(L=1),GO:0016020-membrane(L=1),GO:0032991-macromolecular complex(L=1),	GO:0003824-catalytic activity(L=1),GO:0005488-binding(L=1),
SESE_030592	XP_016559403.1	50.6	MAP	2-succinylbenzoate--CoA ligase, chloroplastic/peroxisomal	NA	AMP-binding enzyme	o-succinylbenzoate---CoA ligase	Ubiquinone and other terpenoid-quinone biosynthesis,Biosynthesis of secondary metabolites	GO:0008152-metabolic process(L=1),		GO:0003824-catalytic activity(L=1),
SESE_062974	XP_018805706.1	48.2	MAP	5'-3' exoribonuclease 4-like isoform	5-3 exoribonuclease	Xrn1 helical domain	5'-3' exoribonuclease	MAPK signaling pathway	GO:0008152-metabolic process(L=1),		GO:0003824-catalytic activity(L=1),
SESE_021525	XP_022752954.1	45.5	MAP	7-deoxyloganetin glucosyltransferase-like	UDP-glycosyltransferase	UDP-glucoronosyl and UDP-glucosyl transferase	cyanohydrin UDP-glucosyltransferase	Cyanoamino acid metabolism,Biosynthesis of secondary metabolites	NA	NA	NA
SESE_045046	XP_025804559.1	61.3	MAP	acidic endochitinase-like	acidic endochitinase-like	Glycosyl hydrolases family 18	chitinase	Amino sugar and nucleotide sugar metabolism	NA	GO:0005623-cell(L=1),GO:0016020-membrane(L=1),	NA
SESE_027943	XP_023554517.1	77.6	MAP	ADP,ATP carrier protein 3,mitochondrial	ADP,ATP carrier protein	Mitochondrial carrier protein	solute carrier family 25 (mitochondrial adenine nucleotide translocator)	Calcium signaling pathway,cGMP-PKG signaling pathway,Necroptosis,Cellular senescence,Pathways of neurodegeneration - multiple diseases	GO:0009987-cellular process(L=1),GO:0044699-single-organism process(L=1),GO:0051179-localization(L=1),	GO:0005623-cell(L=1),GO:0016020-membrane(L=1),GO:0031974-membrane-enclosed lumen(L=1),GO:0043226-organelle(L=1),	GO:0005215-transporter activity(L=1),GO:0005488-binding(L=1),
SESE_027530	XP_001942421.1	29.8	MAP	ankyrin repeat domain containing protein	NACHT domain	Ankyrin repeats (3 copies)	serine/threonine-protein phosphatase 6 regulatory ankyrin repeat	Protein serine/threonine phosphatases	GO:0008152-metabolic process(L=1),GO:0009987-cellular process(L=1),GO:0023052-signaling(L=1),GO:0032501-multicellular organismal process(L=1),GO:0032502-developmental process(L=1),GO:0040007-growth(L=1),GO:0044699-single-organism process(L=1),GO:0050896-response to stimulus(L=1),GO:0065007-biological regulation(L=1),GO:0071840-cellular component organization or biogenesis(L=1),	GO:0005623-cell(L=1),GO:0043226-organelle(L=1),	GO:0003824-catalytic activity(L=1),GO:0005488-binding(L=1),
SESE_017373	XP_006826817.1	50.7	MAP	aspartyl protease	Eukaryotic aspartyl protease	Xylanase inhibitor N-terminal	aspartyl protease APCB1	NA	GO:0008152-metabolic process(L=1),	GO:0016020-membrane(L=1),	GO:0003824-catalytic activity(L=1),GO:0005488-binding(L=1),GO:0009055-electron carrier activity(L=1),
SESE_058212	KHN47037.1	49	MAP	Auxin-induced protein 5NG4-like protein	auxin-induced protein	EamA-like transporter family	WAT1-related protein	NA	GO:0008152-metabolic process(L=1),GO:0009987-cellular process(L=1),GO:0050896-response to stimulus(L=1),GO:0065007-biological regulation(L=1),	GO:0005623-cell(L=1),GO:0016020-membrane(L=1),GO:0031974-membrane-enclosed lumen(L=1),GO:0043226-organelle(L=1),	GO:0003824-catalytic activity(L=1),GO:0005488-binding(L=1),
SESE_060620	QEL09524.1	58.7	MAP	class IV chitinase	NA	Chitinase class I	chitinase	Amino sugar and nucleotide sugar metabolism	GO:0008152-metabolic process(L=1),GO:0009987-cellular process(L=1),GO:0023052-signaling(L=1),GO:0044699-single-organism process(L=1),GO:0050896-response to stimulus(L=1),GO:0065007-biological regulation(L=1),		GO:0003824-catalytic activity(L=1),GO:0005488-binding(L=1),
SESE_064138	XP_017788894.1	45.5	MAP	COMM domain-containing protein 7-like	COMM domain containing 7	COMM domain	COMM domain containing	Ubiquitin system	GO:0008152-metabolic process(L=1),GO:0009987-cellular process(L=1),		GO:0003824-catalytic activity(L=1),GO:0005488-binding(L=1),
SESE_067476	XP_006851423.1	50	MAP	cytochrome P450	NA	Cytochrome P450	cytochrome P450 family 89	Cytochrome	GO:0008152-metabolic process(L=1),GO:0009987-cellular process(L=1),GO:0023052-signaling(L=1),GO:0032501-multicellular organismal process(L=1),GO:0032502-developmental process(L=1),GO:0044699-single-organism process(L=1),GO:0051704-multi-organism process(L=1),	GO:0005576-extracellular region(L=1),GO:0005623-cell(L=1),GO:0016020-membrane(L=1),	GO:0003824-catalytic activity(L=1),GO:0005488-binding(L=1),
SESE_025924	AIN43955.1	44.5	MAP	dehydrin	NA	Dehydrin	dehydrin Xero 1-like	NA	GO:0008152-metabolic process(L=1),	GO:0016020-membrane(L=1),	GO:0003824-catalytic activity(L=1),GO:0005488-binding(L=1),GO:0016209-antioxidant activity(L=1),
SESE_031930	XP_039164228.1	31.7	MAP	disease resistance protein	resistance	NA	TMV resistance protein N-like	NA	GO:0008152-metabolic process(L=1),GO:0009987-cellular process(L=1),GO:0050896-response to stimulus(L=1),	GO:0005623-cell(L=1),GO:0016020-membrane(L=1),GO:0043226-organelle(L=1),	GO:0003824-catalytic activity(L=1),GO:0005488-binding(L=1),
SESE_027435	XP_010261378.1	44.8	MAP	dnaJ protein ERDJ2	translocation protein SEC63	NA	translocation protein	Protein export, Protein processing in endoplasmic reticulum	NA	NA	NA
SESE_036327	XP_020224816.1	32	MAP	F-box/FBD/LRR-repeat protein	F-box LRR-repeat protein	NA	F-box/LRR-repeat protein 13-like	NA	NA	NA	NA
SESE_029966	XP_028210010.1	42.9	MAP	flavonoid 3'-monooxygenase-like isoform	cytochrome P450	Cytochrome P450	cytochrome P450 family	Cytochrome	GO:0008152-metabolic process(L=1),	GO:0005623-cell(L=1),GO:0043226-organelle(L=1),	GO:0003824-catalytic activity(L=1),
SESE_026341	XP_002965201.2	42.4	MAP	GDSL esterase/lipase 6	NA	GDSL-like Lipase/Acylhydrolase	GDSL esterase/lipase 6-like	NA	NA	NA	NA
SESE_105718	XP_021282323.1	87	MAP	glutamate dehydrogenase	glutamate dehydrogenase	Glutamate/Leucine/Phenylalanine/Valine dehydrogenase	glutamate dehydrogenase (NAD(P)+)	Arginine biosynthesis, Alanine, aspartate and glutamate metabolism, D-Glutamine and D-glutamate metabolism, Nitrogen metabolism,Microbial metabolism in diverse environments,Carbon metabolism,Necroptosis,Proximal tubule bicarbonate reclamation	GO:0008152-metabolic process(L=1),GO:0009987-cellular process(L=1),GO:0023052-signaling(L=1),GO:0044699-single-organism process(L=1),GO:0050896-response to stimulus(L=1),GO:0065007-biological regulation(L=1),	GO:0005623-cell(L=1),GO:0031974-membrane-enclosed lumen(L=1),GO:0043226-organelle(L=1),	GO:0003824-catalytic activity(L=1),GO:0005488-binding(L=1),GO:0009055-electron carrier activity(L=1),
SESE_032290	XP_023553741.1	82.9	MAP	glycerate dehydrogenase isoform	Hydroxypyruvate reductase	D-isomer specific 2-hydroxyacid dehydrogenase, NAD binding domain	glycerate dehydrogenase	Glycine, serine and threonine metabolism,Microbial metabolism in diverse environments,Carbon metabolism	NA	NA	NA
SESE_085719	XP_024036086.1	43	MAP	glycine-rich domain-containing protein	Protein of unknown function (DUF1399)	Glycine-rich domain-containing protein-like	glycine-rich domain-containing protein	NA	NA	NA	NA
SESE_115959	XP_029118301.1	54	MAP	G-type lectin S-receptor-like serine/threonine-protein kinase	serine threonine-protein kinase	Protein kinase domain	G-type lectin S-receptor-like serine/threonine-protein kinase	NA	GO:0009987-cellular process(L=1),GO:0044699-single-organism process(L=1),GO:0050896-response to stimulus(L=1),GO:0051179-localization(L=1),	GO:0005623-cell(L=1),GO:0016020-membrane(L=1),GO:0043226-organelle(L=1),	GO:0005215-transporter activity(L=1),
SESE_093968	XP_014516107.1	54.5	MAP	inactive protein kinase SELMODRAFT	inactive protein kinase SELMODRAFT 444075-like	Protein tyrosine kinase	inactive protein kinase	NA	GO:0051179-localization(L=1),	GO:0005623-cell(L=1),	GO:0005215-transporter activity(L=1),
SESE_040676	BBG99232.1	47	MAP	Leucine-rich receptor-like protein kinase family protein	leucine-rich repeat receptor-like serine threonine-protein kinase	Protein kinase domain	putative leucine-rich repeat receptor-like serine/threonine-protein kinase		GO:0008152-metabolic process(L=1),	NA	GO:0003824-catalytic activity(L=1),
SESE_015793	XP_026448105.1	63.3	MAP	mediator of RNA polymerase II transcription subunit 11	mediator of RNA polymerase II transcription subunit 11	Mediator complex protein	mediator of RNA polymerase II transcription	Transcription machinery	GO:0008152-metabolic process(L=1),GO:0009987-cellular process(L=1),GO:0065007-biological regulation(L=1),	GO:0005623-cell(L=1),GO:0031974-membrane-enclosed lumen(L=1),GO:0032991-macromolecular complex(L=1),GO:0043226-organelle(L=1),	GO:0000988-transcription factor activity, protein binding(L=1),
SESE_026949	XP_031274536.1	56.4	MAP	microtubule-associated protein	microtubule-associated protein	Microtubule associated protein (MAP65/ASE1 family)	Ase1/PRC1/MAP65 family protein	NA	GO:0009987-cellular process(L=1),GO:0044699-single-organism process(L=1),GO:0051179-localization(L=1),	GO:0016020-membrane(L=1),
SESE_004548	XP_031250848.1	62.2	MAP	mitochondrial substrate carrier family protein ucpB isoform	mitochondrial substrate carrier family protein	Mitochondrial carrier protein	mitochondrial substrate carrier family protein	NA	NA	GO:0016020-membrane(L=1),	NA
SESE_066024	AEH25775.1	54	MAP	MYB-like protein	myb-like DNA-binding domain containing protein	Myb-like DNA-binding domain	transcription factor MYB	Transcription factors	NA	NA	NA
SESE_013143	XP_038679219.1	62.8	MAP	nuclear pore complex protein NUP98A-like	Nucleoporin autopeptidase	NA	nuclear pore complex protein NUP98A isoform	RNA transport,Amyotrophic lateral sclerosis	GO:0008152-metabolic process(L=1),GO:0009987-cellular process(L=1),	GO:0005623-cell(L=1),GO:0016020-membrane(L=1),	GO:0003824-catalytic activity(L=1),GO:0005488-binding(L=1),
SESE_004680	XP_031475468.1	44.3	MAP	pentatricopeptide repeat-containing protein	Pentatricopeptide repeat-containing protein	PPR repeat	pentatricopeptide repeat-containing protein ELI1, chloroplastic-like		NA	NA	NA
SESE_001890	XP_031481354.1	72	MAP	peroxisomal 2,4-dienoyl-CoA reductase	NA	Enoyl-(Acyl carrier protein) reductase	2,4-dienoyl-CoA reductase	Oxidoreductases	NA	NA	NA
SESE_087166	OMO82874.1	60	MAP	phosphatase 2C (PP2C)-like protein	phosphatase 2C	Protein phosphatase 2C	protein phosphatase	Protein serine/threonine phosphatases	GO:0008152-metabolic process(L=1),GO:0009987-cellular process(L=1),GO:0044699-single-organism process(L=1),GO:0050896-response to stimulus(L=1),	GO:0005576-extracellular region(L=1),GO:0005623-cell(L=1),GO:0043226-organelle(L=1),	GO:0003824-catalytic activity(L=1),GO:0005488-binding(L=1),
SESE_072616	XP_031501009.1	70.8	MAP	phytoene synthase 2, chloroplastic-like	phytoene synthase	Squalene/phytoene synthase	15-cis-phytoene synthase	Carotenoid biosynthesis,Biosynthesis of secondary metabolites	GO:0009987-cellular process(L=1),GO:0044699-single-organism process(L=1),GO:0051179-localization(L=1),GO:0065007-biological regulation(L=1),	GO:0005623-cell(L=1),GO:0016020-membrane(L=1),	GO:0005215-transporter activity(L=1),
SESE_079479	XP_006843841.1	47.6	MAP	probable flavin-containing monooxygenase	flavin-containing monooxygenase	Flavin-binding monooxygenase-like	dimethylaniline monooxygenase	Drug metabolism - cytochrome P450	GO:0000003-reproduction(L=1),GO:0008152-metabolic process(L=1),GO:0009987-cellular process(L=1),GO:0032501-multicellular organismal process(L=1),GO:0044699-single-organism process(L=1),GO:0051704-multi-organism process(L=1),	GO:0005623-cell(L=1),GO:0016020-membrane(L=1),	GO:0003824-catalytic activity(L=1),GO:0005488-binding(L=1),
SESE_079577	XP_007014626.2	65	MAP	protein indeterminate-domain 16	nucleic acid binding transcription factor zinc ion binding	Zinc-finger of C2H2 type	protein indeterminate-domain 16	NA	GO:0008152-metabolic process(L=1),GO:0009987-cellular process(L=1),GO:0044699-single-organism process(L=1),GO:0050896-response to stimulus(L=1),GO:0051704-multi-organism process(L=1),	GO:0005576-extracellular region(L=1),	GO:0003824-catalytic activity(L=1),GO:0005488-binding(L=1),
SESE_027368	XP_016195986.1	50.7	MAP	protein MAIN-LIKE 1-like	serine threonineprotein phosphatase	Plant mobile domain	serine/threonine-protein phosphatase	NA	GO:0008152-metabolic process(L=1),GO:0009987-cellular process(L=1),GO:0050896-response to stimulus(L=1),GO:0065007-biological regulation(L=1),	GO:0005623-cell(L=1),GO:0043226-organelle(L=1),	GO:0001071-nucleic acid binding transcription factor activity(L=1),GO:0005488-binding(L=1),
SESE_072658	XP_024524424.1	36	MAP	protein STICHEL-like 2 isoform	DNA-directed DNA polymerase activity	DNA polymerase III, delta subunit	DNA polymerase III subunit	DNA replication,Mismatch repair	GO:0007610-behavior(L=1),GO:0009987-cellular process(L=1),GO:0032502-developmental process(L=1),GO:0044699-single-organism process(L=1),GO:0050896-response to stimulus(L=1),GO:0051704-multi-organism process(L=1),GO:0071840-cellular component organization or biogenesis(L=1),	GO:0005623-cell(L=1),GO:0032991-macromolecular complex(L=1),GO:0043226-organelle(L=1),	GO:0005488-binding(L=1),
SESE_012239	XP_010943700.1	78.1	MAP	pto-interacting protein	NA	Protein tyrosine kinase	pto-interacting protein	Plant-pathogen interaction	GO:0008152-metabolic process(L=1),GO:0009987-cellular process(L=1),GO:0032501-multicellular organismal process(L=1),GO:0032502-developmental process(L=1),GO:0044699-single-organism process(L=1),GO:0050896-response to stimulus(L=1),GO:0065007-biological regulation(L=1),GO:0071840-cellular component organization or biogenesis(L=1),	GO:0005623-cell(L=1),GO:0043226-organelle(L=1),	NA
SESE_031330	AKH04267.1	75	MAP	putative oxidoreductase	Dehydrogenase	Transposase family tnp2	choline dehydrogenase	Glycine, serine and threonine metabolism	GO:0051179-localization(L=1),	GO:0005623-cell(L=1),GO:0016020-membrane(L=1),GO:0032991-macromolecular complex(L=1),GO:0043226-organelle(L=1),
SESE_026726	XP_012467296.1	51.2	MAP	random slug protein 5-like isoform X1 [Gossypium raimondii]	Random slug protein	CRAL/TRIO domain	random slug protein 5 isoform	NA	NA	GO:0005623-cell(L=1),GO:0016020-membrane(L=1),GO:0043226-organelle(L=1),	GO:0005488-binding(L=1),
SESE_025816	XP_020155159.1	47.5	MAP	receptor kinase-like protein	HIV Tat-specific factor 1	Leucine rich repeat	putative receptor-like protein kinase	Ras signaling pathway	GO:0008152-metabolic process(L=1),GO:0009987-cellular process(L=1),	GO:0005623-cell(L=1),GO:0043226-organelle(L=1),	GO:0003824-catalytic activity(L=1),
SESE_032139	XP_031498766.1	36.8	MAP	replication protein A 70 kDa DNA-binding	replication protein A, 70 kDa DNA-binding	Replication protein A OB domain	replication factor	DNA replication,Fanconi anemia pathway	GO:0008152-metabolic process(L=1),GO:0009987-cellular process(L=1),GO:0050896-response to stimulus(L=1),	GO:0005623-cell(L=1),GO:0016020-membrane(L=1),	GO:0003824-catalytic activity(L=1),GO:0005488-binding(L=1),
SESE_121765	XP_006828231.1	61	MAP	respiratory burst oxidase	respiratory burst oxidase	Ferric reductase NAD binding domain	respiratory burst oxidase	MAPK signaling pathway,Plant-pathogen interaction	GO:0008152-metabolic process(L=1),GO:0009987-cellular process(L=1),GO:0023052-signaling(L=1),GO:0044699-single-organism process(L=1),GO:0050896-response to stimulus(L=1),GO:0065007-biological regulation(L=1),		GO:0003824-catalytic activity(L=1),GO:0005488-binding(L=1),
SESE_113916	XP_026446134.1	72.4	MAP	SWI/SNF complex component SNF12	SWI SNF complex component SNF12	SWIB/MDM2 domain	SWI/SNF-related matrix-associated actin-dependent regulator of chromatin	Thermogenesis,Hepatocellular carcinoma	NA	NA	NA
SESE_030655	ABB82028.1	27	MAP	TIR-NBS disease resistance-like protein [Populus trichocarpa]	resistance protein	NB-ARC domain	TMV resistance protein N	NA	GO:0008152-metabolic process(L=1),GO:0009987-cellular process(L=1),	GO:0005623-cell(L=1),GO:0043226-organelle(L=1),	GO:0003824-catalytic activity(L=1),
SESE_015231	XP_030459041.1	55.6	MAP	TLC domain-containing protein 5-like	TRAM, LAG1 and CLN8 (TLC) lipid-sensing domain containing protein	TLC domain	transmembrane protein 136-like isoform	NA	NA	NA	NA
SESE_101100	XP_030441460.1	26	MAP	TMV resistance protein N-like	NA	NB-ARC domain	resistance protein	Plant-pathogen interaction	GO:0009987-cellular process(L=1),GO:0023052-signaling(L=1),GO:0044699-single-organism process(L=1),GO:0050896-response to stimulus(L=1),GO:0065007-biological regulation(L=1),		GO:0005488-binding(L=1),
SESE_037729	XP_023539971.1	81.3	MAP	transketolase, chloroplastic	Transketolase	Transketolase, thiamine diphosphate binding domain	transketolase	Pentose phosphate pathway, Carbon fixation in photosynthetic organisms,Biosynthesis of ansamycins, Microbial metabolism in diverse environments,Carbon metabolism	NA	GO:0005623-cell(L=1),GO:0043226-organelle(L=1),	NA
SESE_120402	BBH05290.1	47	MAP	transposable element gene	NA	GDSL-like Lipase/Acylhydrolase	adenylate cyclase	Purine metabolism,Longevity regulating pathway	GO:0000003-reproduction(L=1),GO:0008152-metabolic process(L=1),GO:0009987-cellular process(L=1),GO:0032501-multicellular organismal process(L=1),GO:0032502-developmental process(L=1),GO:0044699-single-organism process(L=1),GO:0071840-cellular component organization or biogenesis(L=1),	GO:0005623-cell(L=1),GO:0031974-membrane-enclosed lumen(L=1),GO:0043226-organelle(L=1),	GO:0005488-binding(L=1),
SESE_028794	XP_019234545.1	37.6	MAP	uncharacterized protein	Inherit from KOG: Retrotransposon protein	Domain of unknown function (DUF4283)	uncharacterized	NA	NA	NA	NA
SESE_031320	XP_027057309.1	32.1	MAP	uncharacterized protein	NA	NA	uncharacterized protein	NA	GO:0002376-immune system process(L=1),GO:0008152-metabolic process(L=1),GO:0009987-cellular process(L=1),GO:0023052-signaling(L=1),GO:0044699-single-organism process(L=1),GO:0050896-response to stimulus(L=1),GO:0051704-multi-organism process(L=1),GO:0065007-biological regulation(L=1),	GO:0005623-cell(L=1),GO:0016020-membrane(L=1),GO:0043226-organelle(L=1),	GO:0003824-catalytic activity(L=1),GO:0005488-binding(L=1),
SESE_083263	XP_039173722.1	39	MAP	uncharacterized protein	NA	Reverse transcriptase-like	uncharacterized protein	NA	GO:0032501-multicellular organismal process(L=1),GO:0044699-single-organism process(L=1),GO:0050896-response to stimulus(L=1),GO:0065007-biological regulation(L=1),	GO:0005623-cell(L=1),GO:0043226-organelle(L=1),	GO:0001071-nucleic acid binding transcription factor activity(L=1),GO:0005488-binding(L=1),
SESE_118250	XP_027064440.1	30	MAP	uncharacterized protein	NA	Retrotransposon gag protein	uncharacterized protein	NA	NA	NA	NA
SESE_031985	XP_022971648.1	27.6	MAP	WAT1-related protein At5g64700-like	auxin-induced protein	EamA-like transporter family	WAT1-related protein	NA	GO:0008152-metabolic process(L=1),GO:0009987-cellular process(L=1),GO:0065007-biological regulation(L=1),	GO:0005623-cell(L=1),GO:0043226-organelle(L=1),	GO:0005488-binding(L=1),
SESE_000507	XP_031117952.1	47.8	MAT	carboxypeptidase SOL1	Carboxypeptidase	NA	carboxypeptidase D	Metallocarboxypeptidases	NA	NA	NA
SESE_107702	XP_015649962.1	48.3	MAT	LRR receptor-like serine/threonine-protein kinase	LRR receptor-like serine threonine-protein kinase	Protein kinase domain	LRR receptor-like serine/threonine-protein kinase	NA	NA	NA	NA
SESE_058590	XP_010249185.1	41.3	MAT	RNA polymerase II C-terminal domain phosphatase-like		NLI interacting factor-like phosphatase	RNA polymerase II C-terminal domain phosphatase-like	RNA polymerase II system	GO:0008152-metabolic process(L=1),GO:0009987-cellular process(L=1),GO:0023052-signaling(L=1),GO:0044699-single-organism process(L=1),GO:0050896-response to stimulus(L=1),GO:0051179-localization(L=1),GO:0065007-biological regulation(L=1),	GO:0005623-cell(L=1),GO:0016020-membrane(L=1),	GO:0003824-catalytic activity(L=1),GO:0005215-transporter activity(L=1),GO:0005488-binding(L=1),
SESE_022842	XP_022027445.1	66.4	MAT	1-(5-phosphoribosyl)-5-[(5-phosphoribosylamino)methylideneamino] imidazole-4-carboxamide isomerase, chloroplastic	1-(5-phosphoribosyl)-5- (5-phosphoribosylamino)methylideneamino imidazole-4-carboxamide isomerase	Histidine biosynthesis protein	phosphoribosylformimino-5-aminoimidazole carboxamide ribotide isomerase	Histidine metabolism,Biosynthesis of secondary metabolites	NA	NA	NA
SESE_075615	XP_020700054.1	60	MAT	1,4-dihydroxy-2-naphthoyl-CoA thioesterase	thioesterase	Thioesterase superfamily	1,4-dihydroxy-2-naphthoyl-CoA hydrolase	Ubiquinone and other terpenoid-quinone biosynthesis,Biosynthesis of secondary metabolites	GO:0008152-metabolic process(L=1),	NA	GO:0003824-catalytic activity(L=1),
SESE_030592	XP_016559403.1	50.6	MAT	2-succinylbenzoate--CoA ligase, chloroplastic/peroxisomal		AMP-binding enzyme	o-succinylbenzoate---CoA ligase	Ubiquinone and other terpenoid-quinone biosynthesis,Biosynthesis of secondary metabolites,Biosynthesis of secondary metabolites	GO:0008152-metabolic process(L=1),GO:0009987-cellular process(L=1),GO:0023052-signaling(L=1),GO:0044699-single-organism process(L=1),GO:0050896-response to stimulus(L=1),GO:0065007-biological regulation(L=1),	GO:0005623-cell(L=1),GO:0016020-membrane(L=1),GO:0043226-organelle(L=1),	GO:0003824-catalytic activity(L=1),GO:0005488-binding(L=1),
SESE_034118	XP_006840139.1	89.8	MAT	60S ribosomal protein L13a-4	NA	Ribosomal protein L13	large subunit ribosomal protein L13Ae	Ribosome,Coronavirus disease - COVID-19	GO:0008152-metabolic process(L=1),GO:0009987-cellular process(L=1),	GO:0005623-cell(L=1),	GO:0003824-catalytic activity(L=1),GO:0005488-binding(L=1),
SESE_035587	XP_006829382.1	84.6	MAT	60S ribosomal protein L29-1	60S ribosomal protein	Ribosomal L29e protein family	large subunit ribosomal protein L29e	Ribosome,Coronavirus disease - COVID-19	GO:0008152-metabolic process(L=1),GO:0009987-cellular process(L=1),	NA	GO:0003824-catalytic activity(L=1),GO:0005488-binding(L=1),
SESE_026109	XP_023517428.1	52.8	MAT	ABC transporter B family member 15-like	ABC transporter	ABC transporter	ATP-binding cassette, subfamily B (MDR/TAP), member	ABC transporters,Bile secretion,MicroRNAs in cancer	GO:0008152-metabolic process(L=1),GO:0009987-cellular process(L=1),	GO:0005623-cell(L=1),GO:0016020-membrane(L=1),GO:0043226-organelle(L=1),	GO:0003824-catalytic activity(L=1),
SESE_098354	XP_031263041.1	52.8	MAT	abietadienol/abietadienal oxidase	abietadienol abietadienal	Cytochrome P450	abietadienol/abietadienal oxidase	Diterpenoid biosynthesis,Biosynthesis of secondary metabolites	GO:0009987-cellular process(L=1),GO:0044699-single-organism process(L=1),GO:0051179-localization(L=1),	GO:0016020-membrane(L=1),	GO:0005215-transporter activity(L=1),
SESE_004804	XP_019447971.1	49.7	MAT	acid phosphatase 1-like	acid phosphatase	HAD superfamily, subfamily IIIB (Acid phosphatase)	acid phosphatase 1	NA	GO:0008152-metabolic process(L=1),GO:0009987-cellular process(L=1),	GO:0005623-cell(L=1),	NA
SESE_107637	XP_020206309.1	54.4	MAT	apoptosis-enhancing nuclease	exonuclease	Exonuclease	RNA exonuclease 4	Ribosome biogenesis	NA	NA	NA
SESE_017373	XP_006826817.1	50.7	MAT	aspartyl protease	Eukaryotic aspartyl protease	Xylanase inhibitor N-terminal	aspartyl protease APCB1	NA	NA	GO:0016020-membrane(L=1),	NA
SESE_029568	XP_039828081.1	64	MAT	ATP-dependent RNA helicase DExH1 isoform	ATP-dependent RNA helicase	NA	ATP-dependent RNA helicase DHX36	RNA degradation	GO:0008152-metabolic process(L=1),GO:0009987-cellular process(L=1),GO:0023052-signaling(L=1),GO:0044699-single-organism process(L=1),GO:0050896-response to stimulus(L=1),GO:0065007-biological regulation(L=1),	NA	GO:0003824-catalytic activity(L=1),GO:0005488-binding(L=1),
SESE_038374	XP_012068429.1	76.2	MAT	beta-glucosidase 44	beta-glucosidase	Glycosyl hydrolase family 1	beta-glucosidase	Cyanoamino acid metabolism,Starch and sucrose metabolism, Phenylpropanoid biosynthesis,Biosynthesis of secondary metabolites	NA	NA	NA
SESE_032509	XP_021598658.1	43.5	MAT	cyclic phosphodiesterase	cyclic phosphodiesterase	Cyclic phosphodiesterase-like protein	cyclic phosphodiesterase-like	NA	GO:0009987-cellular process(L=1),GO:0023052-signaling(L=1),GO:0044699-single-organism process(L=1),GO:0050896-response to stimulus(L=1),GO:0065007-biological regulation(L=1),	GO:0005576-extracellular region(L=1),	NA
SESE_109345	XP_026415515.1	75.6	MAT	cyclin-dependent kinase B1-1	NA	Protein kinase domain	cyclin-dependent kinase	Protein kinases	NA	GO:0005623-cell(L=1),GO:0016020-membrane(L=1),GO:0030054-cell junction(L=1),GO:0055044-symplast(L=1),	NA
SESE_036269	XP_024191267.1	46.5	MAT	dnaJ protein ERDJ3A	NA	DnaJ domain	DnaJ homolog subfamily B member 9	Chaperones and folding catalyst	NA	NA	NA
SESE_032417	XP_022766212.1	62.2	MAT	dynein light chain 1, cytoplasmic-like	Dynein light chain type 1	Dynein light chain type 1	dynein light chain LC8-type	Vasopressin-regulated water reabsorption,Salmonella infection	GO:0008152-metabolic process(L=1),	NA	GO:0003824-catalytic activity(L=1),
SESE_030219	XP_011625302.1	38.5	MAT	E3 ubiquitin ligase PARAQUAT TOLERANCE	NA	DWNN domain	E3 ubiquitin-protein ligase RBBP6	Ubiquitin system	GO:0008152-metabolic process(L=1),	GO:0005623-cell(L=1),GO:0043226-organelle(L=1),	GO:0003824-catalytic activity(L=1),
SESE_040688	KAG1334159.1	59.2	MAT	fatty acyl-CoA reductase 2-like	Male sterility protein	Male sterility protein	alcohol-forming fatty acyl-CoA reductase	Cutin, suberine and wax biosynthesis,Peroxisome,Longevity regulating pathway - worm	GO:0008152-metabolic process(L=1),GO:0009987-cellular process(L=1),GO:0023052-signaling(L=1),GO:0044699-single-organism process(L=1),GO:0050896-response to stimulus(L=1),GO:0065007-biological regulation(L=1),	GO:0005623-cell(L=1),GO:0031974-membrane-enclosed lumen(L=1),GO:0043226-organelle(L=1),	GO:0003824-catalytic activity(L=1),GO:0005488-binding(L=1),GO:0009055-electron carrier activity(L=1),
SESE_147247	XP_006465451.1	38.5	MAT	F-box/kelch-repeat protein	F-box kelch-repeat protein	Kelch motif	F-box/kelch-repeat protein	NA	NA	NA	NA
SESE_090540	XP_031503476.1	45.9	MAT	folate-biopterin transporter 9, chloroplastic	integral membrane transporter family protein	BT1 family	probable folate-biopterin transporter 7,maltose/moltooligosaccharide transporter	Transporters	GO:0008152-metabolic process(L=1),GO:0009987-cellular process(L=1),	NA	GO:0003824-catalytic activity(L=1),
SESE_028233	PON57498.1	65.7	MAT	Glucose-methanol-choline oxidoreductase	glucose-methanol-choline (GMC) oxidoreductase family protein	GMC oxidoreductase	choline dehydrogenase	Glycine, serine and threonine metabolism	GO:0009987-cellular process(L=1),GO:0044699-single-organism process(L=1),GO:0051179-localization(L=1),	GO:0016020-membrane(L=1),	GO:0005215-transporter activity(L=1),
SESE_105718	XP_021282323.1	87	MAT	glutamate dehydrogenase 1	glutamate dehydrogenase	Glutamate/Leucine/Phenylalanine/Valine dehydrogenase	glutamate dehydrogenase (NAD(P)+)	Arginine biosynthesis, Alanine, aspartate and glutamate metabolism, D-Glutamine and D-glutamate metabolism, Nitrogen metabolism,Microbial metabolism in diverse environments,Carbon metabolism,Necroptosis,Proximal tubule bicarbonate reclamation	GO:0008152-metabolic process(L=1),GO:0009987-cellular process(L=1),	NA	NA
SESE_030354	XP_011000874.1	43.6	MAT	glutamate receptor	Glutamate-gated receptor that probably acts as non- selective cation channel	Ligand-gated ion channel	glutamate receptor, ionotropic, plant	Ion channels	GO:0000003-reproduction(L=1),GO:0002376-immune system process(L=1),GO:0008152-metabolic process(L=1),GO:0009987-cellular process(L=1),GO:0023052-signaling(L=1),GO:0032501-multicellular organismal process(L=1),GO:0032502-developmental process(L=1),GO:0044699-single-organism process(L=1),GO:0050896-response to stimulus(L=1),GO:0051704-multi-organism process(L=1),GO:0065007-biological regulation(L=1…	GO:0005623-cell(L=1),GO:0032991-macromolecular complex(L=1),GO:0043226-organelle(L=1),	NA
SESE_085719	XP_024036086.1	43.4	MAT	glycine-rich domain-containing protein	Protein of unknown function (DUF1399)	Glycine-rich domain-containing protein-like	glycine-rich domain-containing protein 1	NA	GO:0008152-metabolic process(L=1),GO:0009987-cellular process(L=1),GO:0032501-multicellular organismal process(L=1),GO:0032502-developmental process(L=1),GO:0044699-single-organism process(L=1),	NA	GO:0003824-catalytic activity(L=1),
SESE_004651	XP_020530621.1	59.8	MAT	GPI ethanolamine phosphate transferase 1 isoform	GPI ethanolamine phosphate transferase	Phosphatidylinositolglycan class N (PIG-N)	GPI ethanolamine phosphate transferase	Glycosylphosphatidylinositol (GPI)-anchor biosynthesis, Metabolic pathways	NA	NA	NA
SESE_035122	XP_021610057.1	77.5	MAT	importin beta-like SAD2	importin-7 homolog	Importin-beta N-terminal domain	importin-7	MAPK signaling pathway - fly	GO:0008152-metabolic process(L=1),	NA	GO:0003824-catalytic activity(L=1),
SESE_026200	XP_021692357.1	36.4	MAT	leucine-rich repeat receptor protein kinase EMS1	leucine rich repeat	Leucine rich repeat	LRR receptor-like serine/threonine-protein kinase GSO2	Plant-pathogen interaction	NA	NA	NA
SESE_040676	XP_006481406.2	46.2	MAT	LRR receptor-like serine/threonine-protein kinase	leucine-rich repeat receptor-like serine threonine-protein kinase	Protein kinase domain	leucine-rich repeat receptor-like serine/threonine-protein kinase	NA	NA	NA	NA
SESE_012202	NA	NA	MAT	NA	NA	NA	mucin-4	Membrane trafficking	GO:0008152-metabolic process(L=1),GO:0009987-cellular process(L=1),	GO:0005623-cell(L=1),GO:0032991-macromolecular complex(L=1),GO:0043226-organelle(L=1),	GO:0003824-catalytic activity(L=1),GO:0005488-binding(L=1),
SESE_101398	XP_006844884.1	53.4	MAT	non-canonical poly(A) RNA polymerase PAPD5 isoform	Cid1 family poly A polymerase	Cid1 family poly A polymerase	non-canonical poly(A) RNA polymerase PAPD5/7	RNA degradation	GO:0008152-metabolic process(L=1),GO:0009987-cellular process(L=1),	GO:0005623-cell(L=1),GO:0043226-organelle(L=1),	GO:0003824-catalytic activity(L=1),GO:0005488-binding(L=1),
SESE_094426	XP_010937011.1	70.5	MAT	NRT1/ PTR FAMILY	NA	POT family	solute carrier family 15 (peptide/histidine transporter)	Transporters	GO:0008152-metabolic process(L=1),GO:0009987-cellular process(L=1),	GO:0005623-cell(L=1),GO:0031974-membrane-enclosed lumen(L=1),GO:0032991-macromolecular complex(L=1),GO:0043226-organelle(L=1),	GO:0005198-structural molecule activity(L=1),
SESE_079497	XP_023541824.1	72.8	MAT	nucleobase-ascorbate transporter	nucleobase-ascorbate transporter	Permease family	nucleobase-ascorbate transporter	Transporters	NA	NA	NA
SESE_019897	XP_002514949.2	70.5	MAT	OTU domain-containing protein At3g57810 isoform	OTU-like cysteine protease	OTU-like cysteine protease	OTU domain-containing protein 6	Ubiquitin system	GO:0008152-metabolic process(L=1),GO:0009987-cellular process(L=1),	NA	GO:0003824-catalytic activity(L=1),GO:0005488-binding(L=1),GO:0009055-electron carrier activity(L=1),
SESE_115738	XP_030466568.1	50	MAT	peamaclein-like	Gibberellin regulated protein	Gibberellin regulated protein	peamaclein-like	NA	GO:0009987-cellular process(L=1),GO:0044699-single-organism process(L=1),GO:0051179-localization(L=1),GO:0071840-cellular component organization or biogenesis(L=1),	GO:0005623-cell(L=1),GO:0016020-membrane(L=1),GO:0030054-cell junction(L=1),GO:0043226-organelle(L=1),GO:0055044-symplast(L=1),	NA
SESE_082391	XP_010256135.1	51	MAT	pentatricopeptide repeat-containing protein	pentatricopeptide repeat-containing protein At3g22670	PPR repeat family	pentatricopeptide repeat-containing protein	NA	GO:0009987-cellular process(L=1),GO:0044699-single-organism process(L=1),GO:0051179-localization(L=1),GO:0065007-biological regulation(L=1),GO:0071840-cellular component organization or biogenesis(L=1),	GO:0005623-cell(L=1),GO:0016020-membrane(L=1),GO:0032991-macromolecular complex(L=1),GO:0043226-organelle(L=1),	GO:0005215-transporter activity(L=1),
SESE_026105	XP_008806109.1	86	MAT	peptidyl-prolyl cis-trans isomerase CYP18-2	PPIases accelerate the folding of proteins (By similarity)	Cyclophilin type peptidyl-prolyl cis-trans isomerase/CLD	peptidyl-prolyl cis-trans isomerase-like	Spliceosome	GO:0008152-metabolic process(L=1),GO:0009987-cellular process(L=1),GO:0044699-single-organism process(L=1),GO:0065007-biological regulation(L=1),	GO:0005623-cell(L=1),	GO:0003824-catalytic activity(L=1),GO:0005488-binding(L=1),
SESE_032253	XP_023923150.1	56.6	MAT	phosphatidylinositol glycan anchor biosynthesis class U protein-like isoform	phosphatidylinositol glycan anchor biosynthesis class U	GPI transamidase subunit PIG-U	GPI-anchor transamidase subunit U	Glycosylphosphatidylinositol (GPI)-anchor biosynthesis, Metabolic pathways	NA	NA	NA
SESE_005926	XP_034697411.1	59.5	MAT	poly(A) polymerase I-like isoform	Polynucleotide adenylyltransferase family protein	Poly A polymerase head domain	poly(A) polymerase	RNA degradation	GO:0008152-metabolic process(L=1),GO:0009987-cellular process(L=1),	GO:0005623-cell(L=1),GO:0016020-membrane(L=1),GO:0043226-organelle(L=1),	GO:0003824-catalytic activity(L=1),GO:0005488-binding(L=1),
SESE_057325	XP_028121686.1	85.1	MAT	probable UDP-N-acetylglucosamine--peptide N-acetylglucosaminyltransferase SEC isoform	UDP-N-acetylglucosamine--peptide N-acetylglucosaminyltransferase	Glycosyl transferase family 41	protein O-GlcNAc transferase	Other types of O-glycan biosynthesis	GO:0008152-metabolic process(L=1),GO:0009987-cellular process(L=1),GO:0050896-response to stimulus(L=1),GO:0065007-biological regulation(L=1),	GO:0005623-cell(L=1),GO:0016020-membrane(L=1),GO:0031974-membrane-enclosed lumen(L=1),GO:0043226-organelle(L=1),	GO:0003824-catalytic activity(L=1),GO:0005488-binding(L=1),
SESE_107124	XP_026391260.1	50.3	MAT	protein HOTHEAD-like	NA	GMC oxidoreductase	choline dehydrogenase	Glycine, serine and threonine metabolism,Metabolic pathways	NA	NA	NA
SESE_025281	XP_006840591.1	73	MAT	protein pleiotropic regulatory	protein pleiotropic regulatory locus	WD domain, G-beta repeat	pleiotropic regulator	Spliceosome	GO:0008152-metabolic process(L=1),	GO:0005623-cell(L=1),GO:0016020-membrane(L=1),GO:0030054-cell junction(L=1),GO:0055044-symplast(L=1),	GO:0003824-catalytic activity(L=1),GO:0005488-binding(L=1),
SESE_031095	XP_038722777.1	55	MAT	prothymosin alpha-like	NA	NA	glutamic acid-rich protein	NA	GO:0051179-localization(L=1),	GO:0016020-membrane(L=1),	NA
SESE_052707	XP_006857066.1	39.7	MAT	putative F-box protein	FBOX	F-box domain	F-box protein 7	Ubiquitin system	NA	GO:0005623-cell(L=1),GO:0016020-membrane(L=1),	NA
SESE_032139	XP_031498766.1	36.8	MAT	replication protein A 70 kDa DNA-binding subunit A	replication protein A, 70 kDa DNA-binding	Replication protein A OB domain	replication factor A1	DNA replication, Nucleotide excision repair,Fanconi anemia pathway,Mismatch repair	GO:0000003-reproduction(L=1),GO:0002376-immune system process(L=1),GO:0007094-mitotic spindle assembly checkpoint(L=10),GO:0007610-behavior(L=1),GO:0008152-metabolic process(L=1),GO:0009987-cellular process(L=1),GO:0023052-signaling(L=1),GO:0032501-multicellular organismal process(L=1),GO:0032502-developmental process(L=1),GO:0040007-growth(L=1),GO:0040011-locomotion(L=1),GO:0044699-single-organi…	GO:0005576-extracellular region(L=1),GO:0005623-cell(L=1),GO:0016020-membrane(L=1),GO:0032991-macromolecular complex(L=1),GO:0043226-organelle(L=1),	GO:0003824-catalytic activity(L=1),GO:0005198-structural molecule activity(L=1),GO:0005488-binding(L=1),
SESE_027733	GEY96431.1	50	MAT	retrovirus-related Pol polyprotein from transposon TNT		NA	adenylate cyclase	Purine metabolism,Biofilm formation - Pseudomonas aeruginosa,Meiosis - yeast, Longevity regulating pathway - multiple species	NA	NA	NA
SESE_025798	GFQ02696.1	45	MAT	retrovirus-related pol polyprotein from transposon tnt 1-94		GAG-pre-integrase domain	eukaryotic translation initiation factor	Axon regeneration	GO:0008152-metabolic process(L=1),GO:0009987-cellular process(L=1),GO:0022610-biological adhesion(L=1),GO:0023052-signaling(L=1),GO:0032501-multicellular organismal process(L=1),GO:0032502-developmental process(L=1),GO:0044699-single-organism process(L=1),GO:0050896-response to stimulus(L=1),GO:0065007-biological regulation(L=1),GO:0071840-cellular component organization or biogenesis(L=1),	GO:0005623-cell(L=1),GO:0016020-membrane(L=1),GO:0043226-organelle(L=1),	GO:0003824-catalytic activity(L=1),GO:0004871-signal transducer activity(L=1),GO:0005488-binding(L=1),GO:0060089-molecular transducer activity(L=1),
SESE_032016	XP_031269325.1	57.7	MAT	serine/threonine-protein phosphatase 7	serine threonine-protein phosphatase	Domain of unknown function (DUF4283)	serine/threonine-protein phosphatase	MAPK signaling pathway	NA	NA	NA
SESE_001827	XP_006826451.3	62.3	MAT	serine/threonine-protein phosphatase BSL1	serine threonine-protein phosphatase	Calcineurin-like phosphoesterase	protein phosphatase	Hydrolases	NA	NA	NA
SESE_001243	XP_020207571.1	65.6	MAT	shewanella-like protein phosphatase	Calcineurin-like phosphoesterase	Calcineurin-like phosphoesterase	shewanella-like protein phosphatase 1	NA	NA	NA	NA
SESE_039889	XP_008795112.1	58	MAT	sugar transporter ERD6-like 16	sugar transporter ERD6-like	Sugar (and other) transporter	MFS transporter, SP family, ERD6-like sugar transporter	Transporters	GO:0008152-metabolic process(L=1),GO:0009987-cellular process(L=1),	GO:0016020-membrane(L=1),	GO:0003824-catalytic activity(L=1),GO:0005488-binding(L=1),
SESE_106924	XP_030483774.1	38	MAT	taxadiene 5-alpha hydroxylase	cytochrome P450	Cytochrome P450	beta-amyrin 28-monooxygenase	Cytochrome	GO:0008152-metabolic process(L=1),	NA	GO:0003824-catalytic activity(L=1),GO:0005488-binding(L=1),
SESE_028352	RWR81026.1	74.4	MAT	Tetratricopeptide repeat-like superfamily protein	NA	NA	type IV pilus assembly protein PilF	Bacterial motility proteins,Secretion system	GO:0000003-reproduction(L=1),GO:0008152-metabolic process(L=1),GO:0009987-cellular process(L=1),GO:0032501-multicellular organismal process(L=1),GO:0044699-single-organism process(L=1),GO:0050896-response to stimulus(L=1),GO:0051704-multi-organism process(L=1),	GO:0016020-membrane(L=1),	GO:0003824-catalytic activity(L=1),GO:0005488-binding(L=1),
SESE_035701	XP_017439205.1	33.9	MAT	thaumatin-like protein	NA	Thaumatin family	thaumatin-like protein	NA	GO:0008152-metabolic process(L=1),GO:0009987-cellular process(L=1),	GO:0030054-cell junction(L=1),GO:0055044-symplast(L=1),	GO:0003824-catalytic activity(L=1),GO:0005488-binding(L=1),
SESE_076584	QEH91620.1	38.9	MAT	TIR-NBS-LRR protein	resistance protein	NB-ARC domain	disease resistance protein TAO1	NA	GO:0008152-metabolic process(L=1),GO:0009987-cellular process(L=1),	GO:0005623-cell(L=1),GO:0043226-organelle(L=1),	GO:0003824-catalytic activity(L=1),GO:0005488-binding(L=1),
SESE_098832	QEH91620.1	38.5	MAT	TIR-NBS-LRR protein	resistance protein	NB-ARC domain	resistance protein L6	Plant-pathogen interaction	NA	NA	NA
SESE_102440	QEH91620.1	42.2	MAT	TIR-NBS-LRR protein	resistance protein	NB-ARC domain	disease resistance protein TAO1	NA	GO:0008152-metabolic process(L=1),GO:0009987-cellular process(L=1),	GO:0005623-cell(L=1),	GO:0003824-catalytic activity(L=1),
SESE_032294	XP_018858499.1	31.3	MAT	TMV resistance protein N-like	resistance protein	NB-ARC domain	TMV resistance protein N	NA	GO:0009987-cellular process(L=1),GO:0023052-signaling(L=1),GO:0044699-single-organism process(L=1),GO:0050896-response to stimulus(L=1),GO:0051179-localization(L=1),GO:0065007-biological regulation(L=1),	GO:0005623-cell(L=1),GO:0016020-membrane(L=1),	GO:0004871-signal transducer activity(L=1),GO:0005215-transporter activity(L=1),GO:0060089-molecular transducer activity(L=1),
SESE_085808	XP_028789244.1	42.7	MAT	transcription factor MYC2-like	NA	bHLH-MYC and R2R3-MYB transcription factors N-terminal	transcription factor MYC2	MAPK signaling pathway, Plant hormone signal transduction	NA	NA	NA
SESE_092476	XP_006858817.2	77.6	MAT	translation initiation factor	NA	Domain found in IF2B/IF5	translation initiation factor 2	RNA transport	GO:0008152-metabolic process(L=1),	NA	GO:0003824-catalytic activity(L=1),
SESE_103346	XP_023898837.1	69.2	MAT	transmembrane protein 120	transmembrane protein 120	TMPIT-like protein	transmembrane protein 120	NA	GO:0008152-metabolic process(L=1),GO:0009987-cellular process(L=1),		GO:0003824-catalytic activity(L=1),GO:0005488-binding(L=1),
SESE_075849	XP_010252087.1	63.2	MAT	tRNA (guanine(26)-N(2))-dimethyltransferase	N(2),N(2)-dimethylguanosine tRNA methyltransferase	N2,N2-dimethylguanosine tRNA methyltransferase	tRNA (guanine26-N2/guanine27-N2)-dimethyltransferase	Transfer RNA biogenesis	NA	NA	NA
SESE_031191	EGW08816.1	77.4	MAT	Tubulin alpha	Tubulin	NA	tubulin alpha	Phagosome,Apoptosis, Amyotrophic lateral sclerosis,Pathways of neurodegeneration - multiple diseases,Pathogenic Escherichia coli infection, Salmonella infection		NA	NA
SESE_004990	XP_034903895.1	77.8	MAT	ubiquitin carboxyl-terminal hydrolase 7-like	ubiquitin carboxyl-terminal hydrolase	Ubiquitin carboxyl-terminal hydrolase	ubiquitin carboxyl-terminal hydrolase	Ubiquitin system,Hydrolases	GO:0008152-metabolic process(L=1),GO:0009987-cellular process(L=1),	GO:0005623-cell(L=1),GO:0016020-membrane(L=1),	GO:0003824-catalytic activity(L=1),GO:0005488-binding(L=1),
SESE_123278	XP_006846255.2	73.6	MAT	ubiquitin fusion degradation protein 1	ubiquitin fusion degradation protein 1	Ubiquitin fusion degradation protein UFD1	ubiquitin fusion degradation protein 1	Protein processing in endoplasmic reticulum	GO:0000003-reproduction(L=1),GO:0008152-metabolic process(L=1),GO:0009987-cellular process(L=1),GO:0032501-multicellular organismal process(L=1),GO:0032502-developmental process(L=1),GO:0044699-single-organism process(L=1),GO:0071840-cellular component organization or biogenesis(L=1),	GO:0005623-cell(L=1),GO:0031974-membrane-enclosed lumen(L=1),GO:0043226-organelle(L=1),	GO:0005488-binding(L=1),
SESE_091326	ASK39407.1	51.9	MAT	UDP-glycosyltransferase	hydroxy-2-methylbutyronitrile, forming linamarin and lotaustralin.	UDP-glucoronosyl and UDP-glucosyl transferase	UDP-glycosyltransferase 83A1-like	NA	GO:0008152-metabolic process(L=1),GO:0009987-cellular process(L=1),GO:0023052-signaling(L=1),GO:0044699-single-organism process(L=1),GO:0050896-response to stimulus(L=1),GO:0065007-biological regulation(L=1),	NA	GO:0003824-catalytic activity(L=1),GO:0005488-binding(L=1),
SESE_007516	XP_010910389.1	30.5	MAT	uncharacterized protein	NA	Cotton fibre expressed protein	uncharacterized protein,WNK lysine deficient protein kinase	Protein kinases	GO:0008152-metabolic process(L=1),	GO:0005576-extracellular region(L=1),GO:0005623-cell(L=1),GO:0032991-macromolecular complex(L=1),GO:0043226-organelle(L=1),	GO:0003824-catalytic activity(L=1),GO:0005488-binding(L=1),
SESE_025840	XP_009408482.1	52.1	MAT	uncharacterized protein	Zeta toxin	Zeta toxin	Zeta toxin	NA	GO:0008152-metabolic process(L=1),GO:0009987-cellular process(L=1),	GO:0005623-cell(L=1),GO:0043226-organelle(L=1),	GO:0003824-catalytic activity(L=1),
SESE_029242	XP_026399975.1	53	MAT	uncharacterized protein	NA	NA	uncharacterized protein	NA	GO:0008152-metabolic process(L=1),	NA	GO:0003824-catalytic activity(L=1),GO:0016209-antioxidant activity(L=1),
SESE_029555	XP_024177841.1	54.3	MAT	uncharacterized protein	Retrotransposon protein	NA	uncharacterized	NA	GO:0009987-cellular process(L=1),GO:0044699-single-organism process(L=1),	GO:0005623-cell(L=1),GO:0032991-macromolecular complex(L=1),GO:0043226-organelle(L=1),	NA
SESE_029655	XP_010258199.1	33.9	MAT	uncharacterized protein	Plant protein of unknown function (DUF863)	NA	uncharacterized	NA	GO:0008152-metabolic process(L=1),GO:0009987-cellular process(L=1),GO:0044699-single-organism process(L=1),	GO:0005623-cell(L=1),GO:0016020-membrane(L=1),GO:0043226-organelle(L=1),	NA
SESE_031316	XP_006827821.1	68.1	MAT	uncharacterized protein	Protein of unknown function (DUF1218)	Protein of unknown function (DUF1218)	uncharacterized protein, Kunitz-type protease inhibitor 4	Peptidases and inhibitors	GO:0008152-metabolic process(L=1),GO:0009987-cellular process(L=1),	GO:0016020-membrane(L=1),	GO:0003824-catalytic activity(L=1),GO:0005488-binding(L=1),
SESE_031915	XP_027156177.1	37.6	MAT	uncharacterized protein	Inherit from KOG: Retrotransposon protein	C1 domain	uncharacterized protein	NA	NA	NA	NA
SESE_035712	XP_012853803.1	23.3	MAT	uncharacterized protein	NA	NA	hemoglobin/transferrin/lactoferrin receptor protein	Transporters	GO:0008152-metabolic process(L=1),GO:0009987-cellular process(L=1),	GO:0005623-cell(L=1),GO:0016020-membrane(L=1),	GO:0003824-catalytic activity(L=1),GO:0005488-binding(L=1),
SESE_038773	XP_027191042.1	40.4	MAT	uncharacterized protein	receptor kinase	Legume lectin domain	L-type lectin-domain containing receptor kinase	NA	GO:0008152-metabolic process(L=1),GO:0009987-cellular process(L=1),	GO:0005623-cell(L=1),GO:0043226-organelle(L=1),	NA
SESE_076442	XP_006449119.2	35.4	MAT	uncharacterized protein	receptor-like protein kinase	Protein kinase domain	cysteine-rich receptor-like protein kinase 10 isoform	NA	GO:0008152-metabolic process(L=1),GO:0009987-cellular process(L=1),	NA	GO:0003824-catalytic activity(L=1),GO:0005488-binding(L=1),
SESE_081498	XP_023526951.1	69.3	MAT	uncharacterized protein	lysosomal beta glucosidase-like	Glycosyl hydrolase family 3 N terminal domain	beta-glucosidase	Cyanoamino acid metabolism,Starch and sucrose metabolism,Phenylpropanoid biosynthesis	GO:0008152-metabolic process(L=1),GO:0009987-cellular process(L=1),GO:0023052-signaling(L=1),GO:0044699-single-organism process(L=1),GO:0050896-response to stimulus(L=1),GO:0065007-biological regulation(L=1),	NA	GO:0003824-catalytic activity(L=1),GO:0005488-binding(L=1),
SESE_089652	XP_022771339.1	35.3	MAT	uncharacterized protein	Inherit from euNOG: expressed protein	NA	uncharacterized, protein O-GlcNAc transferase	O-glycan biosynthesis	GO:0008152-metabolic process(L=1),GO:0009987-cellular process(L=1),GO:0023052-signaling(L=1),GO:0044699-single-organism process(L=1),GO:0050896-response to stimulus(L=1),GO:0065007-biological regulation(L=1),	NA	GO:0003824-catalytic activity(L=1),GO:0005488-binding(L=1),
SESE_106885	XP_020527800.1	63.3	MAT	uncharacterized protein	Divergent PAP2 family	Divergent PAP2 family	uncharacterized protein, divergent PAP2 family protein	NA	NA	NA	NA
SESE_118440	XP_017423273.1	46.8	MAT	uncharacterized protein	NA	gag-polypeptide of LTR copia-type	ISWI chromatin-remodeling complex ATPase	NA	GO:0008152-metabolic process(L=1),GO:0009987-cellular process(L=1),	GO:0005623-cell(L=1),	GO:0003824-catalytic activity(L=1),
SESE_132171	XP_010262454.1	53.6	MAT	uncharacterized protein	Plant protein of unknown function (DUF946)	Vacuolar protein sorting-associated protein 62	uncharacterized, alpha-mannosidase	Membrane trafficking	GO:0008152-metabolic process(L=1),	NA	GO:0003824-catalytic activity(L=1),GO:0005488-binding(L=1),GO:0009055-electron carrier activity(L=1),
SESE_113422	XP_026421809.1	87.2	MAT	vesicle-associated membrane protein	vesicle-associated membrane protein	Synaptobrevin	vesicle-associated membrane protein 72	Membrane trafficking	GO:0008152-metabolic process(L=1),GO:0032501-multicellular organismal process(L=1),GO:0032502-developmental process(L=1),GO:0044699-single-organism process(L=1),GO:0065007-biological regulation(L=1),	NA	GO:0003824-catalytic activity(L=1),GO:0005488-binding(L=1),
SESE_031497	XP_002993997.2	45.3	MAT	wall-associated receptor kinase-like 14	wall-associated receptor kinase-like	Protein tyrosine kinase	wall-associated receptor kinase-like	NA	GO:0008152-metabolic process(L=1),GO:0009987-cellular process(L=1),		GO:0003824-catalytic activity(L=1),GO:0005488-binding(L=1),

## Sheet: Table S10
Table S10. GO enrichment analysis for BP, MF and CC in SEGI. All p-value and FDR of GO terms are calculated at Blast2GO.
GO ID	GO Name	GO Type	Parents (ACC)	Parents (Name)	P-Value	FDR	EXPRESSION
GO:0008150	biological_process	BP
GO:0009987	cellular process	BP	GO:0008150	biological_process	2.4e-08	7.5e-06	OVER
GO:0008152	metabolic process	BP	GO:0008150	biological_process	1.7e-06	0.00011	OVER
GO:0071704	organic substance metabolic process	BP	GO:0008152	metabolic process	1.7e-06	0.00011	OVER
GO:0044238	primary metabolic process	BP	GO:0008152	metabolic process	1.7e-06	0.00011	OVER
GO:0006807	nitrogen compound metabolic process	BP	GO:0008152	metabolic process	0.00017	0.0069	OVER
GO:0044237	cellular metabolic process	BP	GO:0009987, GO:0008152	cellular process, metabolic process	1.9e-05	0.00088	OVER
GO:0043170	macromolecule metabolic process	BP	GO:0071704	organic substance metabolic process	0.00049	0.017	OVER
GO:0003674	molecular_function	MF
GO:0003824	catalytic activity	MF	GO:0003674	molecular_function	5.9e-06	0.00031	OVER
GO:0005575	cellular_component	CC
GO:0110165	cellular anatomical entity	CC	GO:0005575	cellular_component	1.7e-06	0.00011	OVER
GO:0016020	membrane	CC	GO:0110165	cellular anatomical entity	0.0013	0.041	OVER
BP=biological process; MF=molecular function; CC=cellular component

[truncated: 1 more sheets: Table S11]
